# Supplementary material
Source: publisher figshare collection journal article supplement (https://gsajournals.figshare.com/articles/dataset/_/11674005)
Supplement: Supplementary file 1 [file 1]

## Sheet: A_gly_v1
Gene ID	CDS length	Effective length	Estimated count	TPM
AG000001-RA	291	131.89	181	18.7579
AG000002-RA	2694	2527.91	1465	7.92125
AG000003-RA	1749	1582.91	4938	42.6396
AG000004-RA	192	50.56	8	2.16272
AG000005-RA	381	217.208	0	0
AG000006-RA	2223	2056.91	2994	19.8955
AG000007-RA	807	640.942	252	5.37401
AG000008-RA	306	145.636	1	0.0938532
AG000009-RA	471	305.555	62	2.77345
AG000010-RA	252	97.2837	0	0
AG000011-RA	1446	1279.91	0	0
AG000012-RA	2241	2074.91	78	0.513823
AG000013-RA	783	616.942	1511	33.4763
AG000014-RA	468	302.58	757	34.1958
AG000015-RA	1101	934.905	1198	17.5148
AG000016-RA	1116	949.905	2892	41.6136
AG000017-RA	351	188.222	4894	355.394
AG000018-RA	5166	4999.91	15334	41.919
AG000019-RA	324	162.552	1515	127.391
AG000020-RA	1536	1369.91	5207	51.9534
AG000021-RA	4242	4075.91	1418	4.7552
AG000022-RA	261	105.053	6	0.780658
AG000023-RA	2244	2077.91	5905	38.8429
AG000024-RA	3093	2926.91	3820	17.839
AG000025-RA	1074	907.905	360	5.41975
AG000026-RA	3498	3331.91	1844	7.56459
AG000027-RA	456	290.738	0	0
AG000028-RA	1554	1387.91	8616	84.8522
AG000029-RA	1374	1207.91	8800	99.5788
AG000030-RA	3657	3490.91	4432	17.3532
AG000031-RA	1644	1477.91	1011	9.35021
AG000032-RA	1638	1471.91	443	4.11378
AG000033-RA	1293	1126.91	5089	61.7251
AG000034-RA	1134	967.905	755	10.6618
AG000035-RA	276	118.385	47052	5432.47
AG000036-RA	777	610.942	1645	36.803
AG000037-RA	2268	2101.91	5432	35.3235
AG000038-RA	7029	6862.91	3642	7.25352
AG000039-RA	522	356.236	120	4.60427
AG000040-RA	1287	1120.91	5588	68.1404
AG000041-RA	366	202.638	1706	115.073
AG000042-RA	1350	1183.91	5808	67.0543
AG000043-RA	1401	1234.91	3218	35.618
AG000044-RA	1440	1273.91	1173	12.5857
AG000045-RA	780	613.942	1661	36.9793
AG000046-RA	1182	1015.91	3078	41.4126
AG000047-RA	897	730.919	1184	22.1411
AG000048-RA	354	191.107	1214	86.8277
AG000049-RA	2634	2467.91	3773	20.8966
AG000050-RA	2343	2176.91	125	0.784852
AG000051-RA	1206	1039.91	96	1.26181
AG000052-RA	10716	10549.9	10145	13.1438
AG000053-RA	1680	1513.91	0	0
AG000054-RA	2265	2098.91	1509	9.82683
AG000055-RA	342	179.616	4	0.304391
AG000056-RA	1794	1627.91	2265	19.0176
AG000057-RA	9501	9334.91	2410	3.52878
AG000058-RA	354	191.107	1068	76.3855
AG000059-RA	240	87.1894	0	0
AG000060-RA	1608	1441.91	1585	15.0248
AG000061-RA	2751	2584.91	4065	21.4948
AG000062-RA	1083	916.905	709	10.5691
AG000063-RA	228	77.4413	1473	259.984
AG000064-RA	1194	1027.91	193	2.56638
AG000065-RA	2346	2179.91	2142	13.4307
AG000066-RA	1884	1717.91	1770	14.0829
AG000067-RA	2406	2239.91	1119	6.82838
AG000068-RA	1377	1210.91	119	1.34324
AG000069-RA	405	240.602	2138	121.458
AG000070-RA	4053	3886.91	1829	6.43171
AG000071-RA	867	700.931	0	0
AG000072-RA	4065	3898.91	4814.79	16.8792
AG012678-RA	9390	9223.91	77	0.114102
AG012679-RA	2616	2449.91	78	0.435173
AG012247-RA	1203	1036.91	12	0.158183
AG012248-RA	558	392.111	1	0.0348584
AG012249-RA	417	252.363	0	0
AG012250-RA	678	511.988	448	11.9601
AG012251-RA	225	75.0425	16	2.91427
AG012252-RA	573	407.091	4771	160.19
AG012253-RA	228	77.4413	0	0
AG015871-RA	1014	847.905	0	0
AG015872-RA	750	583.952	0	0
AG015873-RA	750	583.952	0	0
AG015874-RA	1014	847.905	0	0
AG014124-RA	2400	2233.91	7736	47.3335
AG014125-RA	777	610.942	1757	39.3087
AG014126-RA	252	97.2837	119	16.7195
AG016927-RA	753	586.952	187	4.35468
AG016928-RA	3141	2974.91	0	0
AG017037-RA	240	87.1894	0	0
AG017038-RA	1218	1051.91	226	2.93663
AG012531-RA	315	154.019	0	0
AG012532-RA	522	356.236	0	0
AG012533-RA	555	389.124	133	4.67176
AG012534-RA	714	547.971	1	0.0249436
AG012535-RA	213	65.6919	10	2.08068
AG012536-RA	459	293.684	1	0.0465411
AG012537-RA	489	323.439	452	19.1013
AG012538-RA	237	84.7074	787	126.99
AG012539-RA	288	129.172	214	22.6445
AG012540-RA	381	217.208	3	0.188783
AG011817-RA	489	323.439	75	3.16947
AG011818-RA	384	220.12	2	0.12419
AG011819-RA	1623	1456.91	1767	16.5776
AG011820-RA	246	92.2042	95	14.0828
AG011821-RA	1740	1573.91	179	1.5545
AG011822-RA	1947	1780.91	1139	8.74178
AG016391-RA	924	757.919	172	3.10187
AG016392-RA	1266	1099.91	28.0757	0.348893
AG017258-RA	168	35.2764	0	0
AG017259-RA	1053	886.905	3	0.0462339
AG017405-RA	291	131.89	59	6.11444
AG017406-RA	345	182.475	0	0
AG008909-RA	465	299.59	1	0.0456236
AG008910-RA	867	700.931	1	0.0195003
AG008911-RA	1383	1216.91	0	0
AG008912-RA	699	532.971	1	0.0256457
AG008913-RA	1065	898.905	2627	39.9451
AG008914-RA	813	646.942	2076	43.861
AG008915-RA	2166	1999.91	4380	29.9352
AG008916-RA	618	452.012	2362.61	71.4429
AG008917-RA	1365	1198.91	5	0.0570036
AG008918-RA	732	565.961	977	23.5953
AG008919-RA	624	458.005	4675	139.518
AG008920-RA	2295	2128.91	261	1.67572
AG017450-RA	678	511.988	0	0
AG017451-RA	1263	1096.91	0	0
AG006359-RA	954	787.905	0	0
AG006360-RA	732	565.961	1823	44.0268
AG006361-RA	5358	5191.91	4058	10.6832
AG006362-RA	1014	847.905	150	2.41803
AG006363-RA	228	77.4413	15	2.6475
AG006364-RA	495	329.395	4	0.165981
AG006365-RA	2133	1966.91	4591	31.9037
AG006366-RA	282	123.762	0	0
AG006367-RA	1155	988.905	0	0
AG012747-RA	1212	1045.91	3770	49.2681
AG012748-RA	363	199.75	296	20.2546
AG012749-RA	753	586.952	1624	37.8182
AG012750-RA	2247	2080.91	11318	74.342
AG012751-RA	708	541.971	0	0
AG014275-RA	33	11.6232	0	0
AG014276-RA	915	748.919	9	0.164257
AG014277-RA	1815	1648.91	1166	9.6654
AG014278-RA	753	586.952	233.098	5.42817
AG008436-RA	1683	1516.91	1	0.0090107
AG008437-RA	741	574.952	2	0.0475462
AG008438-RA	411	246.475	406	22.5149
AG008439-RA	1800	1633.91	35	0.292791
AG008440-RA	5055	4888.91	47.0175	0.131451
AG008441-RA	831	664.942	653.3	13.4291
AG008442-RA	738	571.952	493.5	11.7936
AG008443-RA	384	220.12	8.5	0.527809
AG008444-RA	2070	1903.91	118.5	0.850727
AG017776-RA	735	568.961	0	0
AG010464-RA	54	18.8138	0	0
AG010465-RA	990	823.905	890	14.7649
AG010466-RA	2118	1951.91	7757	54.319
AG010467-RA	1869	1702.91	2416	19.392
AG010468-RA	1020	853.905	1525	24.4105
AG010469-RA	633	467.005	133.612	3.91059
AG010470-RA	966	799.905	362.388	6.1923
AG010471-RA	480	314.513	426	18.5135
AG010472-RA	267	110.385	215	26.6223
AG012626-RA	402	237.686	0	0
AG012627-RA	1347	1180.91	0	0
AG012628-RA	189	48.5684	11	3.09568
AG012629-RA	255	99.8736	4	0.547427
AG012630-RA	630	464.005	64	1.88528
AG012631-RA	234	82.26	12	1.99393
AG012632-RA	210	63.5266	0	0
AG012633-RA	507	341.317	0	0
AG010804-RA	1698	1531.91	425	3.79205
AG010805-RA	825	658.942	2718	56.3792
AG010806-RA	243	89.6835	366	55.7809
AG010807-RA	792	625.942	1180	25.7671
AG010808-RA	732	565.961	2313	55.8606
AG010809-RA	1050	883.905	8.18296	0.126538
AG010810-RA	2343	2176.91	2678.5	16.8178
AG009075-RA	2511	2344.91	3068	17.8833
AG009076-RA	3447	3280.91	2953.33	12.3037
AG009077-RA	393	228.901	335	20.0039
AG009078-RA	1581	1414.91	6055	58.493
AG009079-RA	651	485.005	98456	2774.68
AG009080-RA	1320	1153.91	3058	36.223
AG009081-RA	1218	1051.91	21	0.272872
AG009082-RA	2826	2659.91	12460	64.0278
AG009083-RA	369	205.559	1430	95.0859
AG015342-RA	348	185.342	34	2.50739
AG015343-RA	315	154.019	12	1.06493
AG015344-RA	285	126.433	0	0
AG015345-RA	885	718.931	3	0.0570363
AG013355-RA	1386	1219.91	20	0.224089
AG013356-RA	903	736.919	14	0.259672
AG013357-RA	447	281.838	0	0
AG013358-RA	63	22.2258	0	0
AG013359-RA	249	94.7019	9	1.29898
AG013360-RA	726	559.961	405.606	9.90064
AG013361-RA	1305	1138.91	1	0.0120013
AG008747-RA	1035	868.905	2286	35.9601
AG008748-RA	651	485.005	315	8.87732
AG008749-RA	1170	1003.91	137	1.86528
AG008750-RA	2142	1975.91	994.709	6.88093
AG008751-RA	1104	937.905	4991	72.7354
AG008752-RA	312	151.245	2762	249.608
AG008753-RA	4362	4195.91	2117	6.89624
AG014119-RA	576	410.091	25	0.833252
AG014120-RA	2505	2338.91	277	1.61877
AG014121-RA	1080	913.905	15.0431	0.224984
AG014122-RA	1089	922.905	17	0.251773
AG014123-RA	243	89.6835	0	0
AG016434-RA	2712	2545.91	0	0
AG016435-RA	240	87.1894	0	0
AG016436-RA	1293	1126.91	803	9.73969
AG015802-RA	903	736.919	0	0
AG014606-RA	231	79.8665	0	0
AG014607-RA	774	607.942	1383	31.094
AG014608-RA	255	99.8736	0	0
AG014609-RA	1116	949.905	1096	15.7706
AG015831-RA	1422	1255.91	1672	18.1969
AG015832-RA	594	428.056	1383	44.161
AG015833-RA	213	65.6919	253	52.6412
AG015834-RA	1095	928.905	1786	26.2801
AG016998-RA	2031	1864.91	2154	15.7872
AG016999-RA	1395	1228.91	4	0.0444896
AG012254-RA	909	742.919	1	0.0183982
AG012255-RA	738	571.952	0	0
AG012256-RA	1560	1393.91	0	0
AG012257-RA	420	255.299	0	0
AG012258-RA	573	407.091	0	0
AG012259-RA	1500	1333.91	0	0
AG012260-RA	2331	2164.91	0	0
AG014440-RA	471	305.555	0	0
AG014441-RA	1299	1132.91	0	0
AG014442-RA	189	48.5684	0	0
AG014443-RA	219	70.3347	19	3.69233
AG014444-RA	1200	1033.91	54	0.713888
AG017474-RA	189	48.5684	0	0
AG016339-RA	588	422.07	301	9.74762
AG016340-RA	1689	1522.91	827	7.42249
AG016882-RA	237	84.7074	0	0
AG016883-RA	915	748.919	96	1.75208
AG008637-RA	3483	3316.91	4220.5	17.3919
AG008638-RA	1023	856.905	13925.5	222.124
AG008639-RA	378	214.302	27.1015	1.72856
AG008640-RA	426	261.2	123.899	6.48351
AG008641-RA	3483	3316.91	4220.5	17.3919
AG008642-RA	1023	856.905	13925.5	222.124
AG012105-RA	1386	1219.91	0	0
AG012106-RA	327	165.382	304	25.1248
AG012107-RA	651	485.005	112	3.15638
AG012108-RA	3102	2935.91	2773	12.91
AG019162-RA	378	214.302	1	0.063781
AG015155-RA	2070	1903.91	642	4.609
AG015156-RA	381	217.208	0	0
AG015157-RA	504	338.345	0	0
AG015158-RA	405	240.602	0	0
AG016424-RA	285	126.433	144	15.5676
AG016425-RA	339	176.763	4	0.309303
AG016661-RA	5346	5179.91	0	0
AG016662-RA	981	814.905	85	1.4257
AG018617-RA	1713	1546.91	3	0.0265079
AG016706-RA	462	296.63	0	0
AG016707-RA	1566	1399.91	26	0.253858
AG006206-RA	420	255.299	548	29.3392
AG006207-RA	852	685.942	990	19.7272
AG006208-RA	486	320.476	1759	75.0217
AG006209-RA	195	52.6923	4275	1108.93
AG006210-RA	576	410.091	695	23.1644
AG006211-RA	264	107.713	0	0
AG006212-RA	1221	1054.91	1770	22.9338
AG006213-RA	636	470.005	40	1.16326
AG006214-RA	330	168.213	933	75.8124
AG006215-RA	213	65.6919	682	141.902
AG006216-RA	1317	1150.91	5385	63.9533
AG006217-RA	2325	2158.91	6452	40.8487
AG006218-RA	1308	1141.91	8390	100.427
AG006219-RA	717	550.971	2032	50.4095
AG006220-RA	750	583.952	1954	45.7367
AG006221-RA	651	485.005	688	19.3892
AG006222-RA	2067	1900.91	1127	8.10365
AG013560-RA	306	145.636	1	0.0938532
AG013561-RA	375	211.409	0	0
AG013562-RA	585	419.077	1	0.0326154
AG013563-RA	822	655.942	1	0.0208378
AG013564-RA	447	281.838	0	0
AG013565-RA	795	628.942	1	0.0217323
AG013566-RA	180	42.5637	0	0
AG013429-RA	270	113.071	58	7.01124
AG013430-RA	993	826.905	686.223	11.343
AG013431-RA	1578	1411.91	153.976	1.49062
AG013432-RA	738	571.952	92.5	2.21054
AG013433-RA	204	59.1234	29.9957	6.93454
AG016293-RA	333	171.089	4	0.319562
AG016294-RA	219	70.3347	0	0
AG016295-RA	1635	1468.91	3	0.0279154
AG018219-RA	183	44.5175	23	7.06178
AG006552-RA	324	162.552	0	0
AG006553-RA	1062	895.905	182	2.77668
AG006554-RA	1716	1549.91	1724	15.2037
AG006555-RA	2673	2506.91	569	3.10235
AG006556-RA	297	137.392	0	0
AG006557-RA	666	499.996	0	0
AG006558-RA	195	52.6923	0	0
AG006559-RA	705	538.971	230	5.83284
AG006560-RA	318	156.869	15	1.30699
AG006561-RA	609	443.035	19	0.586183
AG006562-RA	3621	3454.91	1922	7.60386
AG006563-RA	2631	2464.91	2765	15.3325
AG017318-RA	2058	1891.91	0	0
AG014757-RA	204	59.1234	39	9.01618
AG014758-RA	750	583.952	0	0
AG014759-RA	708	541.971	0	0
AG014760-RA	216	68.025	0	0
AG014761-RA	2487	2320.91	0	0
AG017166-RA	1167	1000.91	0	0
AG011527-RA	495	329.395	29	1.20337
AG011528-RA	1494	1327.91	41.7386	0.429624
AG011529-RA	918	751.919	1	0.018178
AG011530-RA	972	805.905	2	0.0339206
AG011531-RA	672	505.988	0	0
AG011532-RA	3381	3214.91	6200	26.3597
AG018540-RA	1563	1396.91	1	0.00978476
AG017590-RA	642	476.005	0	0
AG017591-RA	909	742.919	0	0
AG017592-RA	435	270.04	1	0.0506161
AG016664-RA	1056	889.905	0	0
AG016665-RA	1242	1075.91	0	0
AG017123-RA	6690	6523.91	0	0
AG017355-RA	3381	3214.91	0	0
AG014032-RA	348	185.342	138	10.1771
AG014033-RA	1173	1006.91	3571	48.475
AG014034-RA	438	272.986	30	1.5021
AG014035-RA	711	544.971	20	0.501619
AG014036-RA	573	407.091	1874	62.9209
AG014037-RA	225	75.0425	405	73.7675
AG014038-RA	477	311.534	47229.2	2072.15
AG015498-RA	1512	1345.91	0	0
AG015499-RA	1299	1132.91	0	0
AG015500-RA	360	196.846	0	0
AG015501-RA	207	61.3367	0	0
AG015502-RA	216	68.025	0	0
AG015338-RA	186	46.5575	0	0
AG015339-RA	312	151.245	22.3211	2.0172
AG015340-RA	969	802.905	0	0
AG015341-RA	1518	1351.91	0	0
AG018216-RA	516	350.259	0	0
AG018217-RA	225	75.0425	0	0
AG018076-RA	543	377.162	0	0
AG018077-RA	747	580.952	0	0
AG018653-RA	432	267.103	0	0
AG008338-RA	1140	973.905	2948	41.374
AG008339-RA	2337	2170.91	461	2.90253
AG008340-RA	1014	847.905	52221	841.811
AG008341-RA	573	407.091	32	1.07442
AG008342-RA	1911	1744.91	2468	19.3326
AG008343-RA	1884	1717.91	5190	41.2938
AG008344-RA	1203	1036.91	16	0.21091
AG008345-RA	1185	1018.91	0	0
AG016906-RA	1491	1324.91	0	0
AG016907-RA	1752	1585.91	0	0
AG018901-RA	495	329.395	1145	47.5122
AG017962-RA	3132	2965.91	0	0
AG018673-RA	801	634.942	3	0.0645809
AG019164-RA	777	610.942	0	0
AG016782-RA	231	79.8665	0	0
AG016783-RA	1644	1477.91	0	0
AG017112-RA	2385	2218.91	0	0
AG018896-RA	2808	2641.91	1	0.00517368
AG010487-RA	2265	2098.91	2	0.0130243
AG010488-RA	615	449.02	76	2.31348
AG010489-RA	3483	3316.91	1551	6.3914
AG010490-RA	1047	880.905	1621	25.1519
AG010491-RA	2496	2329.91	41	0.240526
AG016976-RA	729	562.961	21.8517	0.530548
AG014899-RA	1845	1678.91	42.6778	0.347451
AG014900-RA	765	598.942	2.09319	0.0477684
AG014901-RA	1638	1471.91	0	0
AG014906-RA	1692	1525.91	409	3.66364
AG014907-RA	1305	1138.91	507.129	6.08622
AG018862-RA	717	550.971	0	0
AG017570-RA	4140	3973.91	0	0
AG011618-RA	540	374.175	992	36.2371
AG011619-RA	234	82.26	487	80.9203
AG011620-RA	4419	4252.91	2862	9.19816
AG011621-RA	3078	2911.91	487	2.28596
AG011622-RA	963	796.905	1521	26.0879
AG015070-RA	777	610.942	2	0.0447452
AG015071-RA	339	176.763	0	0
AG015072-RA	1503	1336.91	12	0.122687
AG015073-RA	270	113.071	0	0
AG015074-RA	654	488.005	0	0
AG019107-RA	1152	985.905	0	0
AG018441-RA	2706	2539.91	0	0
AG018486-RA	903	736.919	6	0.111288
AG017606-RA	5364	5197.91	1.0091	0.00265353
AG017423-RA	243	89.6835	0	0
AG017424-RA	711	544.971	0	0
AG018769-RA	3567	3400.91	0	0
AG012019-RA	387	223.06	147.187	9.01911
AG012020-RA	744	577.952	0	0
AG012021-RA	1143	976.905	0	0
AG012022-RA	393	228.901	0	0
AG012023-RA	2076	1909.91	0	0
AG012024-RA	1131	964.905	0	0
AG012025-RA	555	389.124	0	0
AG012026-RA	945	778.919	0	0
AG012027-RA	651	485.005	1	0.028182
AG017219-RA	150	25.6139	88.2674	47.1022
AG017220-RA	387	223.06	0	0
AG017221-RA	246	92.2042	496.629	73.6204
AG016891-RA	258	102.478	0	0
AG016892-RA	225	75.0425	0	0
AG016893-RA	333	171.089	0	0
AG017703-RA	5037	4870.91	0	0
AG017670-RA	924	757.919	3	0.0541023
AG014738-RA	2073	1906.91	418	2.99615
AG014739-RA	3729	3562.91	8603	33.0037
AG014740-RA	738	571.952	271.261	6.48254
AG018056-RA	7740	7573.91	0	0
AG016786-RA	3252	3085.91	0	0
AG016787-RA	2196	2029.91	1	0.00673351
AG018418-RA	855	688.942	0	0
AG018419-RA	3711	3544.91	0	0
AG018895-RA	312	151.245	0	0
AG010993-RA	3918	3751.91	19	0.069218
AG010994-RA	597	431.042	0	0
AG010995-RA	558	392.111	0	0
AG010996-RA	615	449.02	1	0.0304405
AG010997-RA	369	205.559	0	0
AG010998-RA	498	332.373	0	0
AG010999-RA	1779	1612.91	20	0.169488
AG011000-RA	780	613.942	0	0
AG011001-RA	1713	1546.91	0.5	0.00441798
AG011002-RA	387	223.06	0	0
AG011003-RA	390	226.004	0	0
AG011004-RA	198	54.8018	0	0
AG018677-RA	321	159.691	0	0
AG018021-RA	5058	4891.91	1	0.00279408
AG017126-RA	2847	2680.91	0	0
AG017127-RA	291	131.89	0	0
AG017018-RA	501	335.362	3	0.122271
AG017019-RA	2250	2083.91	63	0.413218
AG018001-RA	660	493.996	0	0
AG018002-RA	1995	1828.91	45.1226	0.337225
AG016312-RA	543	377.162	0	0
AG016313-RA	876	709.931	1	0.0192531
AG016314-RA	717	550.971	42	1.04193
AG015868-RA	489	323.439	0	0
AG015869-RA	789	622.942	0	0
AG015870-RA	1068	901.905	0	0
AG017309-RA	2052	1885.91	0	0
AG018220-RA	7482	7315.91	0	0
AG019114-RA	2496	2329.91	1	0.0058665
AG016367-RA	879	712.931	2	0.0383442
AG016368-RA	489	323.439	1	0.0422595
AG016369-RA	684	517.979	1	0.0263879
AG016370-RA	234	82.26	0	0
AG015305-RA	1038	871.905	22	0.344882
AG015306-RA	723	556.961	1	0.024541
AG015751-RA	243	89.6835	0	0
AG015752-RA	735	568.961	0	0
AG015753-RA	681	514.988	0	0
AG018640-RA	6405	6238.91	1	0.00219083
AG016524-RA	843	676.942	2	0.0403827
AG016525-RA	1479	1312.91	251	2.61311
AG016526-RA	822	655.942	12	0.250053
AG017482-RA	2148	1981.91	29.1322	0.200913
AG013567-RA	2154	1987.91	0	0
AG013568-RA	1077	910.905	4	0.0600211
AG013569-RA	4170	4003.91	2739	9.35029
AG017267-RA	1404	1237.91	188.341	2.07958
AG016809-RA	2922	2755.91	0	0
AG016810-RA	1413	1246.91	0	0
AG018723-RA	3477	3310.91	0	0
AG017133-RA	1104	937.905	0	0
AG008954-RA	1488	1321.91	468	4.83908
AG008955-RA	3720	3553.91	5375	20.6723
AG008956-RA	3669	3502.91	3638	14.1955
AG008957-RA	1635	1468.91	558.511	5.19702
AG016051-RA	2895	2728.91	0	0
AG016052-RA	2211	2044.91	0	0
AG016375-RA	369	205.559	4	0.265975
AG016376-RA	246	92.2042	11	1.63064
AG018501-RA	2541	2374.91	0	0
AG013992-RA	423	258.261	325	17.2005
AG013993-RA	780	613.942	3661	81.5059
AG013994-RA	1416	1249.91	2319	25.3595
AG013995-RA	1620	1453.91	4096	38.5071
AG013996-RA	2370	2203.91	113	0.700814
AG014908-RA	510	344.283	1	0.039701
AG014909-RA	255	99.8736	0	0
AG014910-RA	294	134.647	1	0.101513
AG014911-RA	1653	1486.91	2	0.018385
AG014912-RA	456	290.738	14	0.658179
AG014913-RA	1566	1399.91	1082	10.5644
AG019015-RA	3879	3712.91	0	0
AG014685-RA	978	811.905	9	0.151514
AG014686-RA	213	65.6919	50	10.4034
AG014687-RA	426	261.2	1	0.0523292
AG014688-RA	279	121.079	1.5	0.169332
AG014689-RA	1800	1633.91	23.7511	0.198689
AG016743-RA	1740	1573.91	0	0
AG016744-RA	663	496.996	0	0
AG016844-RA	903	736.919	691.474	12.8255
AG016845-RA	1407	1240.91	0	0
AG016846-RA	798	631.942	0	0
AG015674-RA	1161	994.905	28	0.384674
AG015675-RA	699	532.971	18	0.461622
AG015676-RA	1023	856.905	464	7.4012
AG017879-RA	912	745.919	0	0
AG018800-RA	372	208.479	0	0
AG019007-RA	6231	6064.91	0	0
AG017200-RA	576	410.091	0	0
AG017201-RA	576	410.091	0	0
AG015838-RA	4110	3943.91	0	0
AG015839-RA	717	550.971	0	0
AG017574-RA	1530	1363.91	0	0
AG017575-RA	639	473.005	0	0
AG019054-RA	297	137.392	0	0
AG016803-RA	3219	3052.91	0	0
AG017268-RA	2976	2809.91	0	0
AG017269-RA	3468	3301.91	0	0
AG015080-RA	1857	1690.91	2	0.0161669
AG015081-RA	921	754.919	1	0.0181058
AG015082-RA	2832	2665.91	2	0.0102542
AG015083-RA	594	428.056	0	0
AG015084-RA	876	709.931	0	0
AG018300-RA	798	631.942	0	0
AG016345-RA	1578	1411.91	0	0
AG016346-RA	2694	2527.91	0	0
AG017457-RA	1974	1807.91	0	0
AG016668-RA	1662	1495.91	0	0
AG018464-RA	2862	2695.91	0	0
AG017525-RA	2343	2176.91	0	0
AG017526-RA	1770	1603.91	0	0
AG015196-RA	597	431.042	1	0.0317101
AG015197-RA	693	526.979	41	1.06343
AG015198-RA	183	44.5175	0	0
AG015199-RA	612	446.035	0	0
AG015200-RA	774	607.942	0	0
AG017477-RA	1293	1126.91	0	0
AG016609-RA	438	272.986	1	0.05007
AG016610-RA	180	42.5637	1	0.321127
AG016611-RA	960	793.905	4	0.0688665
AG018987-RA	1122	955.905	0	0
AG018685-RA	3102	2935.91	0	0
AG017636-RA	1062	895.905	0	0
AG016123-RA	1446	1279.91	7	0.0747545
AG016124-RA	582	416.091	4	0.131398
AG016125-RA	522	356.236	318	12.2013
AG016296-RA	645	479.005	0	0
AG016297-RA	576	410.091	0	0
AG016298-RA	465	299.59	0	0
AG016677-RA	2703	2536.91	0	0
AG016678-RA	2703	2536.91	0	0
AG018728-RA	3141	2974.91	0	0
AG018975-RA	2412	2245.91	0	0
AG013892-RA	3732	3565.91	0	0
AG013893-RA	1581	1414.91	1069	10.3268
AG013894-RA	570	404.105	3665	123.964
AG013895-RA	1320	1153.91	1002	11.869
AG017353-RA	1407	1240.91	0	0
AG017354-RA	1179	1012.91	0	0
AG015105-RA	3078	2911.91	0	0
AG017815-RA	1350	1183.91	4	0.0461806
AG019103-RA	2358	2191.91	0	0
AG018008-RA	651	485.005	0	0
AG017153-RA	1257	1090.91	0	0
AG016930-RA	444	278.88	490	24.0158
AG012941-RA	1233	1066.91	1	0.0128112
AG012942-RA	717	550.971	0	0
AG012943-RA	207	61.3367	171	38.1059
AG012944-RA	1248	1081.91	681.986	8.61595
AG012945-RA	1134	967.905	2	0.0282432
AG012946-RA	252	97.2837	0	0
AG012947-RA	495	329.395	0	0
AG017088-RA	2730	2563.91	0	0
AG017089-RA	1593	1426.91	0	0
AG017377-RA	204	59.1234	0	0
AG017378-RA	1389	1222.91	0	0
AG017421-RA	4479	4312.91	4	0.0126767
AG016821-RA	1068	901.905	28216	427.614
AG016822-RA	510	344.283	1065	42.2816
AG014823-RA	1227	1060.91	1867	24.0539
AG014824-RA	1167	1000.91	226	3.08626
AG014825-RA	207	61.3367	1	0.222842
AG014826-RA	306	145.636	1	0.0938532
AG019032-RA	2136	1969.91	0	0
AG017595-RA	2124	1957.91	0	0
AG018638-RA	1380	1213.91	0	0
AG016411-RA	747	580.952	0	0
AG017873-RA	1194	1027.91	0	0
AG017443-RA	1443	1276.91	0	0
AG017768-RA	1293	1126.91	0	0
AG017079-RA	1146	979.905	0	0
AG012922-RA	927	760.919	4092	73.5046
AG012923-RA	342	179.616	640	48.7026
AG012924-RA	1779	1612.91	14615	123.853
AG012925-RA	1188	1021.91	4080	54.5716
AG012926-RA	1068	901.905	231	3.50081
AG017806-RA	1668	1501.91	0	0
AG016272-RA	921	754.919	0	0
AG016273-RA	303	142.931	0	0
AG016274-RA	1041	874.905	0	0
AG018639-RA	2073	1906.91	0	0
AG018953-RA	504	338.345	0	0
AG018153-RA	2244	2077.91	0	0
AG017850-RA	4251	4084.91	0	0
AG013115-RA	762	595.942	0	0
AG013116-RA	288	129.172	0	0
AG013117-RA	369	205.559	0	0
AG013118-RA	1095	928.905	0	0
AG013119-RA	1617	1450.91	2	0.0188412
AG013120-RA	276	118.385	0	0
AG013121-RA	2703	2536.91	0	0
AG018334-RA	4440	4273.91	0	0
AG018260-RA	4383	4216.91	0	0
AG018647-RA	300	140.137	0	0
AG015627-RA	1932	1765.91	71.5	0.553421
AG015628-RA	1386	1219.91	3	0.0336134
AG015629-RA	744	577.952	17.0828	0.404003
AG018497-RA	4431	4264.91	0	0
AG018785-RA	180	42.5637	0	0
AG014327-RA	198	54.8018	0	0
AG014328-RA	1659	1492.91	0	0
AG014329-RA	252	97.2837	0	0
AG014330-RA	516	350.259	0	0
AG014331-RA	528	362.218	0	0
AG014332-RA	543	377.162	0	0
AG014333-RA	663	496.996	0	0
AG018687-RA	2376	2209.91	0	0
AG017001-RA	1215	1048.91	0	0
AG017002-RA	900	733.919	0	0
AG017772-RA	1623	1456.91	0	0
AG011467-RA	858	691.942	3	0.0592609
AG011468-RA	363	199.75	2	0.136855
AG011469-RA	504	338.345	2093	84.5524
AG011470-RA	702	535.971	553.001	14.1027
AG011471-RA	1725	1558.91	2056	18.0269
AG011472-RA	849	682.942	2791	55.859
AG011473-RA	2031	1864.91	1197	8.77313
AG013276-RA	1878	1711.91	5952	47.5226
AG013277-RA	4128	3961.91	714	2.46327
AG017511-RA	1014	847.905	0	0
AG018984-RA	4545	4378.91	1	0.00312141
AG011804-RA	2481	2314.91	0	0
AG011805-RA	1275	1108.91	0	0
AG011806-RA	2328	2161.91	0	0
AG011807-RA	690	523.979	0	0
AG011808-RA	714	547.971	2	0.0498873
AG011809-RA	1941	1774.91	2	0.0154018
AG011810-RA	366	202.638	1.2	0.0809426
AG018730-RA	303	142.931	0	0
AG018105-RA	759	592.942	0	0
AG018106-RA	420	255.299	0	0
AG014832-RA	546	380.15	9124.2	328.063
AG014833-RA	192	50.56	9110.31	2462.88
AG014834-RA	3405	3238.91	16	0.067521
AG018898-RA	609	443.035	0	0
AG018791-RA	1809	1642.91	0	0
AG019120-RA	2424	2257.91	0	0
AG013516-RA	2169	2002.91	1	0.00682428
AG013517-RA	309	148.468	1	0.0920631
AG013518-RA	273	115.74	1	0.118095
AG013519-RA	447	281.838	3	0.145492
AG013520-RA	330	168.213	1	0.0812566
AG013521-RA	702	535.971	0	0
AG013522-RA	594	428.056	1	0.0319313
AG013523-RA	411	246.475	91	5.04644
AG017333-RA	1038	871.905	0	0
AG018248-RA	1458	1291.91	1	0.01058
AG012505-RA	498	332.373	1	0.0411236
AG012506-RA	1038	871.905	3.0169	0.0472942
AG012507-RA	282	123.762	1479.22	163.367
AG012508-RA	702	535.971	5.16576	0.131738
AG012509-RA	294	134.647	990.349	100.533
AG012510-RA	513	347.277	0	0
AG012511-RA	747	580.952	2	0.0470551
AG012512-RA	108	14.1676	713.16	688.032
AG018928-RA	114	14.4512	0	0
AG019041-RA	429	264.156	0	0
AG017191-RA	501	335.362	0	0
AG017192-RA	678	511.988	0	0
AG012461-RA	303	142.931	0	0
AG012462-RA	441	275.94	1.3006	0.0644236
AG012463-RA	750	583.952	0	0
AG012464-RA	663	496.996	0	0
AG012465-RA	669	502.988	0	0
AG012466-RA	672	505.988	0	0
AG012467-RA	321	159.691	0	0
AG012468-RA	666	499.996	0	0
AG012469-RA	3027	2860.91	6.03282	0.0288226
AG012862-RA	600	434.035	0	0
AG012863-RA	960	793.905	0	0
AG012864-RA	444	278.88	3	0.147035
AG012865-RA	429	264.156	0	0
AG012866-RA	216	68.025	0	0
AG012867-RA	618	452.012	0	0
AG012868-RA	693	526.979	0	0
AG012869-RA	1116	949.905	0	0
AG012870-RA	285	126.433	0	0
AG012871-RA	495	329.395	0	0
AG014552-RA	759	592.942	13.4259	0.309492
AG014553-RA	1800	1633.91	88	0.736161
AG014554-RA	1209	1042.91	8.5	0.111402
AG014555-RA	1209	1042.91	8.5	0.111402
AG014556-RA	1800	1633.91	88	0.736161
AG014557-RA	759	592.942	13.4259	0.309492
AG015201-RA	2022	1855.91	2313	17.0348
AG015202-RA	942	775.919	563	9.91766
AG012164-RA	1983	1816.91	2991	22.501
AG012165-RA	2658	2491.91	8248	45.2412
AG012166-RA	1572	1405.91	3603	35.0288
AG013485-RA	3087	2920.91	0	0
AG013486-RA	1269	1102.91	0	0
AG013487-RA	480	314.513	0	0
AG013488-RA	831	664.942	0	0
AG013489-RA	300	140.137	0	0
AG013490-RA	297	137.392	0	0
AG013491-RA	1428	1261.91	3	0.0324946
AG014530-RA	2055	1888.91	1	0.00723614
AG014531-RA	522	356.236	0	0
AG014532-RA	633	467.005	14	0.409755
AG014533-RA	306	145.636	0	0
AG013632-RA	255	99.8736	13	1.77914
AG013633-RA	528	362.218	1	0.0377352
AG013634-RA	696	529.971	1	0.0257908
AG013635-RA	1287	1120.91	0	0
AG013636-RA	927	760.919	0	0
AG013637-RA	465	299.59	0	0
AG013638-RA	1368	1201.91	0	0
AG015677-RA	1689	1522.91	0	0
AG015678-RA	363	199.75	0	0
AG015679-RA	564	398.105	0	0
AG015823-RA	960	793.905	20.0209	0.344692
AG015824-RA	192	50.56	0	0
AG015825-RA	531	365.212	0	0
AG015826-RA	381	217.208	0	0
AG014819-RA	483	317.482	0	0
AG014820-RA	270	113.071	0	0
AG014821-RA	1851	1684.91	1891.67	15.3457
AG014822-RA	1674	1507.91	0	0
AG013253-RA	846	679.942	2	0.0402045
AG013254-RA	513	347.277	6.5	0.255832
AG013255-RA	531	365.212	0	0
AG013256-RA	351	188.222	14	1.01666
AG013257-RA	450	284.8	0	0
AG013258-RA	273	115.74	0	0
AG013333-RA	756	589.942	0	0
AG013334-RA	909	742.919	0	0
AG013335-RA	909	742.919	0	0
AG013336-RA	702	535.971	0	0
AG013239-RA	1344	1177.91	0	0
AG013240-RA	552	386.131	0	0
AG013241-RA	1770	1603.91	0	0
AG013242-RA	510	344.283	0	0
AG013243-RA	519	353.248	1	0.0386935
AG013244-RA	465	299.59	0	0
AG013245-RA	837	670.942	0	0
AG018634-RA	348	185.342	0	0
AG017022-RA	420	255.299	95	5.08617
AG017023-RA	906	739.919	213.654	3.9468
AG014397-RA	417	252.363	1	0.0541616
AG014398-RA	462	296.63	2	0.0921578
AG014399-RA	1140	973.905	3	0.0421038
AG014400-RA	363	199.75	0	0
AG014401-RA	750	583.952	0	0
AG014402-RA	924	757.919	0	0
AG014403-RA	888	721.931	0	0
AG014127-RA	2505	2338.91	2141	12.5118
AG014128-RA	2046	1879.91	72	0.523496
AG014129-RA	444	278.88	1239	60.7255
AG014130-RA	984	817.905	1049	17.5303
AG013919-RA	3351	3184.91	715.5	3.07065
AG013920-RA	1023	856.905	0	0
AG013921-RA	1308	1141.91	9550.9	114.322
AG013922-RA	525	359.224	1.10475	0.0420356
AG013923-RA	558	392.111	2537	88.4358
AG019101-RA	477	311.534	21.9827	0.964478
AG016413-RA	348	185.342	0	0
AG016414-RA	1296	1129.91	432	5.22587
AG014720-RA	3039	2872.91	1186	5.64261
AG014721-RA	555	389.124	272.909	9.58622
AG014722-RA	3216	3049.91	0	0
AG012423-RA	342	179.616	1	0.0760979
AG012424-RA	5538	5371.91	7112	18.0959
AG012425-RA	5538	5371.91	7112	18.0959
AG012426-RA	342	179.616	1	0.0760979
AG017244-RA	210	63.5266	14	3.01224
AG017245-RA	1317	1150.91	2	0.0237524
AG014693-RA	2580	2413.91	1710	9.68262
AG014694-RA	387	223.06	939	57.5388
AG013043-RA	1233	1066.91	0	0
AG013044-RA	252	97.2837	0	0
AG013045-RA	435	270.04	0	0
AG013046-RA	645	479.005	5	0.142675
AG013047-RA	414	249.422	1513	82.9129
AG013048-RA	516	350.259	88	3.43408
AG013049-RA	1593	1426.91	258	2.47139
AG016639-RA	981	814.905	3	0.0503189
AG016640-RA	171	37.0646	0	0
AG012328-RA	1473	1306.91	0	0
AG012329-RA	1746	1579.91	0	0
AG012330-RA	315	154.019	0	0
AG012331-RA	513	347.277	0	0
AG012332-RA	600	434.035	0	0
AG012333-RA	279	121.079	0	0
AG012334-RA	555	389.124	0	0
AG012335-RA	48	16.2614	0	0
AG012336-RA	468	302.58	0	0
AG012337-RA	225	75.0425	0	0
AG012338-RA	363	199.75	0	0
AG014541-RA	354	191.107	0	0
AG014542-RA	402	237.686	0	0
AG014543-RA	744	577.952	0	0
AG014544-RA	363	199.75	0	0
AG014545-RA	1500	1333.91	1	0.0102469
AG015487-RA	3087	2920.91	2038.84	9.54078
AG015588-RA	675	508.988	1	0.026854
AG015589-RA	903	736.919	0	0
AG015590-RA	519	353.248	2	0.0773869
AG015591-RA	372	208.479	0	0
AG015592-RA	930	763.919	0	0
AG015593-RA	189	48.5684	0	0
AG015594-RA	1230	1063.91	0	0
AG016938-RA	480	314.513	1	0.0434588
AG016939-RA	1821	1654.91	2	0.0165186
AG018693-RA	1236	1069.91	0	0
AG015698-RA	1482	1315.91	0	0
AG015699-RA	1131	964.905	0	0
AG015700-RA	1131	964.905	0	0
AG015701-RA	1152	985.905	3	0.0415914
AG015702-RA	2079	1912.91	21	0.150052
AG015900-RA	939	772.919	134.017	2.36998
AG015901-RA	315	154.019	0	0
AG015902-RA	192	50.56	0	0
AG015903-RA	435	270.04	0	0
AG015904-RA	522	356.236	0	0
AG015556-RA	2745	2578.91	1789.42	9.48405
AG015557-RA	378	214.302	90.3127	5.76024
AG017678-RA	1299	1132.91	0	0
AG016966-RA	1314	1147.91	1141	13.5862
AG016522-RA	252	97.2837	0	0
AG016523-RA	642	476.005	0	0
AG016208-RA	1413	1246.91	45	0.493283
AG015180-RA	498	332.373	12	0.493483
AG015181-RA	234	82.26	9	1.49545
AG015182-RA	327	165.382	50	4.13236
AG015183-RA	225	75.0425	14	2.54999
AG018888-RA	219	70.3347	0.5	0.0971666
AG017637-RA	834	667.942	24	0.491122
AG013807-RA	1008	841.905	222.5	3.6123
AG013808-RA	393	228.901	0	0
AG013809-RA	1074	907.905	111.5	1.67862
AG013810-RA	1074	907.905	111.5	1.67862
AG013811-RA	393	228.901	0	0
AG013812-RA	1008	841.905	222.5	3.6123
AG015092-RA	318	156.869	2.92575	0.254929
AG015093-RA	627	461.005	0	0
AG015094-RA	1146	979.905	2.11767	0.0295387
AG015095-RA	381	217.208	2	0.125855
AG017639-RA	1515	1348.91	3	0.0303988
AG017640-RA	2934	2767.91	9.23256	0.0455919
AG016978-RA	1446	1279.91	0	0
AG016979-RA	825	658.942	0	0
AG016980-RA	765	598.942	0	0
AG016981-RA	1524	1357.91	0	0
AG017326-RA	2337	2170.91	0	0
AG017327-RA	354	191.107	0	0
AG018136-RA	9945	9778.91	0	0
AG016834-RA	723	556.961	58.8224	1.44356
AG018792-RA	1077	910.905	0	0
AG011811-RA	594	428.056	421	13.4431
AG011812-RA	1863	1696.91	4300	34.636
AG011813-RA	426	261.2	1165	60.9635
AG011814-RA	1551	1384.91	2351	23.2033
AG011815-RA	252	97.2837	812	114.086
AG011816-RA	1167	1000.91	1518	20.7298
AG018198-RA	519	353.248	0	0
AG017662-RA	1158	991.905	0	0
AG018585-RA	711	544.971	0	0
AG018256-RA	1788	1621.91	0	0
AG014648-RA	1311	1144.91	2940	35.099
AG014649-RA	2691	2524.91	10361	56.0885
AG014650-RA	954	787.905	121	2.09908
AG014651-RA	1254	1087.91	82	1.03024
AG018993-RA	1752	1585.91	0	0
AG012927-RA	615	449.02	1064	32.3887
AG012928-RA	252	97.2837	0	0
AG012929-RA	624	458.005	110	3.28277
AG012930-RA	2637	2470.91	2555	14.1336
AG012931-RA	330	168.213	0	0
AG012932-RA	312	151.245	1	0.0903722
AG012933-RA	282	123.762	0	0
AG017054-RA	366	202.638	5	0.337261
AG017055-RA	495	329.395	2.10552	0.0873695
AG016849-RA	222	72.6734	0	0
AG016850-RA	378	214.302	0	0
AG016851-RA	249	94.7019	0	0
AG018466-RA	2082	1915.91	0	0
AG008243-RA	1695	1528.91	2541	22.7165
AG008244-RA	663	496.996	3316	91.1965
AG008245-RA	1992	1825.91	1056	7.90501
AG008246-RA	345	182.475	1021	76.4784
AG008247-RA	4551	4384.91	6505	20.277
AG008248-RA	1641	1474.91	199	1.84419
AG008249-RA	195	52.6923	14	3.6316
AG008250-RA	432	267.103	34	1.73987
AG017753-RA	309	148.468	2925	269.285
AG018743-RA	2259	2092.91	0	0
AG018910-RA	405	240.602	45	2.55641
AG018330-RA	2370	2203.91	0	0
AG018776-RA	228	77.4413	0	0
AG015203-RA	774	607.942	0	0
AG015204-RA	2388	2221.91	2157	13.2691
AG017506-RA	150	25.6139	0	0
AG017507-RA	855	688.942	0	0
AG016954-RA	1215	1048.91	13	0.169404
AG004807-RA	954	787.905	762	13.219
AG004808-RA	222	72.6734	68	12.7894
AG004809-RA	8820	8653.91	28564	45.1153
AG004810-RA	543	377.162	1245	45.1188
AG004811-RA	243	89.6835	476.751	72.66
AG004812-RA	1620	1453.91	8185	76.9484
AG004813-RA	1743	1576.91	2617	22.6838
AG004814-RA	741	574.952	111	2.63881
AG004815-RA	252	97.2837	0	0
AG004816-RA	330	168.213	0	0
AG004817-RA	1374	1207.91	2688	30.4168
AG004818-RA	1167	1000.91	2828	38.6192
AG004819-RA	1284	1117.91	241	2.94665
AG004820-RA	1161	994.905	805	11.0594
AG004821-RA	930	763.919	712	12.7394
AG004822-RA	1203	1036.91	95	1.25228
AG004823-RA	714	547.971	1736	43.3021
AG004824-RA	216	68.025	6	1.20559
AG017788-RA	846	679.942	0	0
AG018408-RA	1887	1720.91	1285	10.2062
AG017741-RA	1797	1630.91	0	0
AG012994-RA	951	784.919	592	10.3089
AG012995-RA	444	278.88	1	0.0490117
AG012996-RA	798	631.942	4	0.0865166
AG012997-RA	486	320.476	4	0.170601
AG012998-RA	198	54.8018	0	0
AG012999-RA	261	105.053	2	0.260219
AG013000-RA	246	92.2042	18	2.66833
AG013001-RA	831	664.942	11.1592	0.229386
AG017861-RA	1653	1486.91	0	0
AG016105-RA	498	332.373	1	0.0411236
AG017508-RA	1224	1057.91	0	0
AG017509-RA	807	640.942	0	0
AG017944-RA	327	165.382	1	0.0826473
AG018244-RA	1617	1450.91	6.27502	0.0591144
AG015631-RA	786	619.942	170	3.74813
AG015632-RA	6039	5872.91	5445	12.6725
AG014789-RA	1314	1147.91	3610	42.9851
AG014790-RA	219	70.3347	2569	499.242
AG014791-RA	318	156.869	4	0.348531
AG014792-RA	1395	1228.91	2161	24.0355
AG014793-RA	303	142.931	0	0
AG018729-RA	324	162.552	0	0
AG012309-RA	264	107.713	0	0
AG012310-RA	135	19.4859	3	2.10435
AG012311-RA	2007	1840.91	467	3.46739
AG012312-RA	2223	2056.91	4489	29.8299
AG012313-RA	1326	1159.91	5696	67.1219
AG012314-RA	1326	1159.91	1102	12.986
AG009099-RA	975	808.905	149.331	2.5233
AG009100-RA	903	736.919	61	1.13143
AG009101-RA	1200	1033.91	710.861	9.39768
AG009102-RA	294	134.647	545	55.3244
AG009103-RA	1062	895.905	81	1.23578
AG009104-RA	777	610.942	1199	26.8248
AG009105-RA	570	404.105	18542.6	627.181
AG009106-RA	969	802.905	3458	58.8678
AG009107-RA	1080	913.905	1917	28.6707
AG009108-RA	984	817.905	1034	17.2796
AG009109-RA	792	625.942	53	1.15733
AG009110-RA	2448	2281.91	2952	17.6822
AG011016-RA	567	401.105	0	0
AG011017-RA	720	553.961	0	0
AG011018-RA	201	56.9655	0	0
AG011019-RA	2115	1948.91	717	5.02858
AG011020-RA	843	676.942	11	0.222105
AG011021-RA	669	502.988	7.26079	0.197307
AG011022-RA	333	171.089	14	1.11847
AG008786-RA	579	413.091	2.2076	0.0730451
AG008787-RA	2142	1975.91	10200	70.5588
AG008788-RA	324	162.552	2.01718	0.169617
AG008789-RA	210	63.5266	0	0
AG008790-RA	720	553.961	5445	134.349
AG008791-RA	909	742.919	1483	27.2846
AG008792-RA	1167	1000.91	2651	36.2021
AG008793-RA	951	784.919	180	3.13448
AG008794-RA	1242	1075.91	932	11.8402
AG008795-RA	837	670.942	2015	41.0494
AG008796-RA	1185	1018.91	0	0
AG008797-RA	210	63.5266	38	8.17608
AG014670-RA	819	652.942	1021	21.3731
AG014671-RA	1218	1051.91	75	0.974544
AG014672-RA	330	168.213	3069	249.376
AG014673-RA	1080	913.905	4093	61.215
AG014674-RA	810	643.942	201	4.26645
AG014675-RA	318	156.869	1	0.0871327
AG007692-RA	1629	1462.91	0	0
AG007693-RA	558	392.111	0	0
AG007694-RA	228	77.4413	1	0.1765
AG007695-RA	1647	1480.91	0	0
AG007696-RA	1761	1594.91	0	0
AG007697-RA	285	126.433	0	0
AG007698-RA	882	715.931	0	0
AG007699-RA	396	231.835	1	0.0589572
AG007700-RA	414	249.422	0	0
AG007701-RA	312	151.245	0	0
AG007702-RA	573	407.091	0	0
AG007703-RA	738	571.952	0	0
AG007704-RA	684	517.979	1	0.0263879
AG007705-RA	414	249.422	137	7.50764
AG007706-RA	225	75.0425	52	9.47138
AG007707-RA	270	113.071	23	2.78032
AG007708-RA	660	493.996	1199	33.1751
AG013950-RA	1461	1294.91	280.281	2.95851
AG013951-RA	3144	2977.91	1646.72	7.55832
AG013952-RA	618	452.012	583	17.6293
AG013953-RA	1947	1780.91	3850	29.5486
AG017917-RA	2028	1861.91	0	0
AG008051-RA	555	389.124	2	0.070252
AG008052-RA	2265	2098.91	46	0.299559
AG008053-RA	9516	9349.91	30.0224	0.0438889
AG008054-RA	528	362.218	181	6.83008
AG008055-RA	1221	1054.91	1	0.012957
AG019044-RA	2316	2149.91	0	0
AG018882-RA	2088	1921.91	0	0
AG009432-RA	1368	1201.91	118	1.34193
AG009433-RA	1203	1036.91	806	10.6246
AG009434-RA	294	134.647	18	1.82723
AG009435-RA	315	154.019	794	70.4632
AG009436-RA	1398	1231.91	1181	13.1036
AG009437-RA	1527	1360.91	2476	24.8679
AG009438-RA	945	778.919	205	3.59732
AG009439-RA	654	488.005	12	0.336105
AG009440-RA	540	374.175	14	0.511411
AG009441-RA	243	89.6835	0	0
AG009442-RA	522	356.236	3	0.115107
AG008183-RA	1287	1120.91	2953	36.009
AG008184-RA	1317	1150.91	5606	66.578
AG008185-RA	738	571.952	622	14.8644
AG008186-RA	1275	1108.91	3031	37.3601
AG008187-RA	1047	880.905	1326	20.5746
AG008188-RA	1170	1003.91	19984	272.086
AG008189-RA	6141	5974.91	2071	4.73768
AG008190-RA	1020	853.905	6874	110.031
AG008191-RA	231	79.8665	134	22.9328
AG008192-RA	483	317.482	5998	258.229
AG018257-RA	1299	1132.91	0	0
AG014602-RA	1206	1039.91	20	0.262877
AG014603-RA	612	446.035	377	11.5529
AG014604-RA	2022	1855.91	4325	31.8528
AG014605-RA	1548	1381.91	2951	29.1882
AG017752-RA	549	383.131	8.40836	0.299973
AG018608-RA	435	270.04	0	0
AG018060-RA	2175	2008.91	0	0
AG010771-RA	606	440.035	0	0
AG010772-RA	306	145.636	0	0
AG010773-RA	1146	979.905	317	4.42173
AG010774-RA	561	395.105	11	0.380538
AG010775-RA	378	214.302	5	0.318905
AG010776-RA	381	217.208	280	17.6198
AG010777-RA	345	182.475	1	0.0749053
AG010778-RA	1428	1261.91	8	0.0866523
AG010779-RA	387	223.06	0	0
AG010780-RA	273	115.74	2	0.23619
AG017844-RA	705	538.971	0	0
AG017419-RA	855	688.942	0	0
AG017420-RA	552	386.131	0	0
AG010376-RA	2226	2059.91	936	6.21077
AG010377-RA	11676	11509.9	68	0.0807522
AG003688-RA	3708	3541.91	1669	6.44075
AG003689-RA	381	217.208	493	31.0234
AG003690-RA	477	311.534	3756	164.792
AG003691-RA	2145	1978.91	1518	10.4849
AG003692-RA	543	377.162	601	21.7803
AG003693-RA	2970	2803.91	3235	15.7699
AG003694-RA	2385	2218.91	2712	16.7058
AG003695-RA	1680	1513.91	3919	35.3829
AG003696-RA	3492	3325.91	8432	34.6528
AG003697-RA	789	622.942	18591	407.917
AG003698-RA	1242	1075.91	2597	32.9925
AG003699-RA	1497	1330.91	4505	46.2663
AG003700-RA	1596	1429.91	2035	19.4524
AG003701-RA	969	802.905	1844	31.3916
AG003702-RA	456	290.738	675	31.7336
AG003703-RA	1008	841.905	100	1.62351
AG003704-RA	342	179.616	13	0.989272
AG003705-RA	681	514.988	29	0.769694
AG003706-RA	1695	1528.91	1888	16.8787
AG003707-RA	225	75.0425	38	6.92139
AG018970-RA	1140	973.905	0	0
AG017300-RA	1887	1720.91	0	0
AG018548-RA	2175	2008.91	0	0
AG010047-RA	534	368.206	5	0.185608
AG010048-RA	1188	1021.91	178.2	2.38349
AG010049-RA	822	655.942	7250.74	151.089
AG010050-RA	1635	1468.91	1439	13.3901
AG010051-RA	1536	1369.91	1192	11.8933
AG010052-RA	456	290.738	139	6.53478
AG010053-RA	1467	1300.91	1992	20.9296
AG010054-RA	453	287.752	0	0
AG010055-RA	1551	1384.91	0	0
AG013144-RA	2784	2617.91	4105	21.4327
AG013145-RA	801	634.942	93	2.00201
AG013146-RA	549	383.131	1103	39.3501
AG013147-RA	546	380.15	3320	119.371
AG013148-RA	1842	1675.91	144	1.17444
AG013149-RA	213	65.6919	5	1.04034
AG017865-RA	291	131.89	20	2.07269
AG011305-RA	588	422.07	439	14.2166
AG011306-RA	1095	928.905	21.3742	0.314511
AG011307-RA	1527	1360.91	1307.63	13.1333
AG011308-RA	2586	2419.91	4125	23.2993
AG011309-RA	498	332.373	92	3.78337
AG011310-RA	420	255.299	307	16.4364
AG011311-RA	867	700.931	2373	46.2743
AG011312-RA	381	217.208	745	46.8812
AG018964-RA	330	168.213	69	5.6067
AG018409-RA	2277	2110.91	0	0
AG012276-RA	321	159.691	137	11.7262
AG012277-RA	861	694.942	3	0.0590051
AG012278-RA	870	703.931	0	0
AG012279-RA	633	467.005	0	0
AG017989-RA	1194	1027.91	0	0
AG018506-RA	345	182.475	0	0
AG009060-RA	975	808.905	3	0.0506921
AG009061-RA	471	305.555	0	0
AG009062-RA	438	272.986	0	0
AG009063-RA	258	102.478	0	0
AG009064-RA	270	113.071	0	0
AG009065-RA	750	583.952	2.48083	0.0580681
AG009066-RA	846	679.942	2	0.0402045
AG009067-RA	7647	7480.91	15138	27.6587
AG009068-RA	1482	1315.91	11	0.114258
AG016856-RA	1674	1507.91	1668	15.1196
AG016857-RA	429	264.156	0	0
AG018856-RA	780	613.942	0	0
AG017906-RA	1800	1633.91	0	0
AG006306-RA	396	231.835	71	4.18596
AG006307-RA	360	196.846	0	0
AG006308-RA	819	652.942	4961	103.851
AG006309-RA	1179	1012.91	5581	75.3113
AG006310-RA	891	724.919	2857	53.8689
AG006311-RA	1662	1495.91	3526	32.2178
AG006312-RA	1212	1045.91	433	5.65865
AG006313-RA	1374	1207.91	3208	36.301
AG006314-RA	6045	5878.91	2841	6.60529
AG006315-RA	1812	1645.91	2375	19.7231
AG006316-RA	1164	997.905	2514	34.4344
AG017701-RA	1791	1624.91	0	0
AG018036-RA	1782	1615.91	0	0
AG017939-RA	2100	1933.91	0	0
AG018660-RA	1512	1345.91	171	1.7366
AG000209-RA	1515	1348.91	1.0121	0.0102555
AG000210-RA	1842	1675.91	947	7.72356
AG000211-RA	1515	1348.91	500.988	5.07648
AG000212-RA	222	72.6734	179	33.6662
AG000213-RA	852	685.942	1805	35.9672
AG000214-RA	516	350.259	1672	65.2474
AG000215-RA	1524	1357.91	4530	45.598
AG000216-RA	1164	997.905	1348	18.4636
AG000217-RA	1230	1063.91	35	0.449658
AG000218-RA	3012	2845.91	1206	5.7922
AG000219-RA	1413	1246.91	2208	24.2037
AG000220-RA	2052	1885.91	7982	57.8507
AG000221-RA	1023	856.905	1380	22.0122
AG000222-RA	1965	1798.91	266	2.02111
AG000223-RA	1110	943.905	1529	22.1409
AG000224-RA	531	365.212	1940	72.6062
AG000225-RA	243	89.6835	2175	331.485
AG000226-RA	1212	1045.91	2144	28.0188
AG000227-RA	4569	4402.91	5275	16.3757
AG000228-RA	2196	2029.91	55	0.370343
AG000229-RA	2136	1969.91	1788	12.4062
AG000230-RA	1524	1357.91	2475	24.9128
AG000231-RA	633	467.005	621	18.1755
AG000232-RA	255	99.8736	35	4.78999
AG000233-RA	2103	1936.91	432	3.04854
AG000234-RA	1752	1585.91	1226	10.5665
AG000235-RA	276	118.385	93	10.7375
AG000236-RA	1773	1606.91	1697	14.4347
AG000237-RA	1089	922.905	565	8.36774
AG000238-RA	351	188.222	2	0.145237
AG000239-RA	1458	1291.91	3917	41.4419
AG000240-RA	939	772.919	550	9.72626
AG000241-RA	354	191.107	426	30.4684
AG000242-RA	2859	2692.91	2447	12.4202
AG000243-RA	1413	1246.91	5091	55.8067
AG000244-RA	1461	1294.91	2423	25.576
AG000245-RA	810	643.942	1473	31.266
AG000246-RA	681	514.988	1341	35.5917
AG000247-RA	594	428.056	8217	262.379
AG000248-RA	5031	4864.91	3316	9.31659
AG000249-RA	738	571.952	4644	110.981
AG000250-RA	1443	1276.91	1350	14.4508
AG000251-RA	564	398.105	48	1.64801
AG000252-RA	999	832.905	842	13.8176
AG000253-RA	6168	6001.91	19236	43.8069
AG000254-RA	969	802.905	1240	21.1093
AG000255-RA	3396	3229.91	1945	8.23089
AG000256-RA	1272	1105.91	4327	53.4793
AG018088-RA	2322	2155.91	0	0
AG018331-RA	2076	1909.91	0	0
AG014084-RA	1965	1798.91	75	0.569862
AG014085-RA	1506	1339.91	1337	13.6387
AG014086-RA	1797	1630.91	6200	51.9613
AG017628-RA	1182	1015.91	0	0
AG019038-RA	510	344.283	54	2.14386
AG016645-RA	1272	1105.91	0	0
AG018499-RA	1521	1354.91	0	0
AG017439-RA	1614	1447.91	0	0
AG007302-RA	6111	5944.91	37872	87.0744
AG007303-RA	624	458.005	12	0.35812
AG007304-RA	6438	6271.91	8118.35	17.6923
AG017344-RA	1014	847.905	0	0
AG018332-RA	1356	1189.91	0	0
AG004147-RA	606	440.035	0	0
AG004148-RA	390	226.004	0	0
AG004149-RA	375	211.409	4	0.258615
AG004150-RA	873	706.931	15	0.290022
AG004151-RA	411	246.475	10	0.554553
AG004152-RA	180	42.5637	0	0
AG004153-RA	738	571.952	0	0
AG004154-RA	1713	1546.91	0.5	0.00441798
AG004155-RA	282	123.762	0	0
AG004156-RA	195	52.6923	0	0
AG004157-RA	729	562.961	0	0
AG004158-RA	663	496.996	0	0
AG004159-RA	1287	1120.91	1	0.0121941
AG004160-RA	408	243.553	0	0
AG004161-RA	183	44.5175	0	0
AG004162-RA	2403	2236.91	8	0.0488832
AG004163-RA	1104	937.905	12	0.17488
AG004164-RA	909	742.919	7	0.128788
AG004165-RA	372	208.479	0	0
AG004166-RA	489	323.439	0	0
AG004167-RA	771	604.942	431	9.73824
AG004168-RA	627	461.005	334	9.90281
AG004169-RA	1842	1675.91	1639	13.3674
AG004170-RA	624	458.005	4	0.119373
AG004171-RA	2388	2221.91	164	1.00887
AG018089-RA	1929	1762.91	0	0
AG015153-RA	1230	1063.91	1	0.0128474
AG015154-RA	873	706.931	0	0
AG010581-RA	2010	1843.91	1146	8.49499
AG010582-RA	675	508.988	1103	29.62
AG010583-RA	1704	1537.91	7789	69.226
AG010584-RA	2013	1846.91	2082	15.4082
AG010585-RA	2028	1861.91	12	0.0880929
AG010586-RA	1203	1036.91	2	0.0263638
AG007103-RA	1683	1516.91	324	2.91947
AG007104-RA	1707	1540.91	1055	9.35823
AG007105-RA	822	655.942	662	13.7946
AG007106-RA	981	814.905	236	3.95842
AG007107-RA	216	68.025	19	3.81771
AG007108-RA	1257	1090.91	112	1.40329
AG007109-RA	2883	2716.91	2147	10.8013
AG007110-RA	273	115.74	1	0.118095
AG007111-RA	4035	3868.91	6672	23.5714
AG007112-RA	651	485.005	305	8.5955
AG012265-RA	1479	1312.91	2034	21.1755
AG012266-RA	2481	2314.91	5174	30.5499
AG012267-RA	234	82.26	3	0.498482
AG012268-RA	549	383.131	2714	96.8233
AG012269-RA	378	214.302	626	39.9269
AG018102-RA	249	94.7019	30	4.32992
AG018103-RA	216	68.025	0	0
AG015488-RA	735	568.961	429	10.306
AG015489-RA	474	308.544	0	0
AG015490-RA	1761	1594.91	796	6.82174
AG017531-RA	1575	1408.91	0	0
AG018519-RA	252	97.2837	67	9.41351
AG014350-RA	243	89.6835	38	5.79146
AG014351-RA	1107	940.905	1231	17.8825
AG014352-RA	609	443.035	1071	33.0422
AG014353-RA	1374	1207.91	3789	42.8755
AG014354-RA	1632	1465.91	13011	121.317
AG016832-RA	615	449.02	0	0
AG016833-RA	645	479.005	0	0
AG018844-RA	816	649.942	0	0
AG009923-RA	1149	982.905	2857	39.7297
AG009924-RA	1566	1399.91	6016	58.7389
AG009925-RA	2184	2017.91	575	3.89479
AG009926-RA	1287	1120.91	777	9.47478
AG009927-RA	948	781.919	307.843	5.38127
AG009928-RA	633	467.005	10.1571	0.297279
AG009929-RA	420	255.299	0	0
AG018745-RA	2172	2005.91	0	0
AG005204-RA	2316	2149.91	8566.6	54.4636
AG005205-RA	4317	4150.91	1662.56	5.47458
AG005206-RA	726	559.961	17.0707	0.416688
AG005207-RA	894	727.919	424	7.9616
AG005208-RA	636	470.005	817	23.7595
AG005209-RA	1488	1321.91	3726	38.5265
AG005210-RA	969	802.905	961	16.3597
AG005211-RA	1650	1483.91	14502	133.579
AG005212-RA	885	718.931	5896	112.095
AG005213-RA	3465	3298.91	11213	46.4589
AG005214-RA	1728	1561.91	565	4.94437
AG010198-RA	936	769.919	11103	197.112
AG010199-RA	771	604.942	2874	64.9367
AG010200-RA	408	243.553	3327	186.714
AG010201-RA	408	243.553	1204	67.5693
AG010202-RA	411	246.475	112	6.211
AG010203-RA	708	541.971	2324	58.6108
AG010204-RA	1542	1375.91	2992	29.7228
AG010205-RA	1269	1102.91	1310	16.2349
AG010206-RA	1308	1141.91	1480	17.7153
AG019001-RA	2220	2053.91	0	0
AG012773-RA	1227	1060.91	859	11.0671
AG012774-RA	348	185.342	11	0.811215
AG012775-RA	336	173.897	1985	156.022
AG012776-RA	987	820.905	367	6.11069
AG012777-RA	1017	850.905	2141	34.3916
AG012778-RA	1746	1579.91	31	0.268193
AG011183-RA	1290	1123.91	1555	18.9111
AG011184-RA	3354	3187.91	4196	17.9907
AG011185-RA	2103	1936.91	1784	12.5894
AG011186-RA	405	240.602	1332	75.6697
AG011187-RA	483	317.482	591	25.444
AG011188-RA	771	604.942	257	5.80679
AG011189-RA	996	829.905	12843	211.522
AG016591-RA	1461	1294.91	10047	106.051
AG018835-RA	1788	1621.91	0	0
AG018165-RA	906	739.919	0	0
AG013629-RA	3009	2842.91	1260	6.05794
AG013630-RA	714	547.971	762	19.007
AG013631-RA	708	541.971	2065	52.0788
AG003843-RA	2082	1915.91	14	0.0998783
AG003844-RA	261	105.053	9.22464	1.20022
AG003845-RA	2073	1906.91	5915	42.3977
AG003846-RA	1473	1306.91	2156	22.5487
AG003847-RA	4098	3931.91	6971	24.2331
AG003848-RA	1338	1171.91	4	0.0466535
AG003849-RA	1236	1069.91	2688	34.34
AG003850-RA	615	449.02	2969	90.3778
AG003851-RA	867	700.931	1865	36.3681
AG003852-RA	1353	1186.91	1973	22.721
AG003853-RA	276	118.385	0	0
AG003854-RA	381	217.208	1.06945	0.067298
AG003855-RA	741	574.952	667	15.8566
AG003856-RA	516	350.259	729	28.4482
AG003857-RA	2517	2350.91	3556	20.6749
AG003858-RA	822	655.942	3259	67.9103
AG003859-RA	996	829.905	1459	24.0294
AG003860-RA	1131	964.905	3833	54.2964
AG017964-RA	528	362.218	0	0
AG019050-RA	2268	2101.91	2	0.0130057
AG018268-RA	1236	1069.91	0	0
AG015531-RA	1356	1189.91	5212	59.87
AG015532-RA	1413	1246.91	1804	19.7752
AG011733-RA	453	287.752	7	0.332504
AG011734-RA	540	374.175	20	0.730588
AG011735-RA	981	814.905	2	0.0335459
AG011736-RA	198	54.8018	3	0.748245
AG011737-RA	786	619.942	23	0.5071
AG011738-RA	468	302.58	2	0.0903455
AG011739-RA	1611	1444.91	0	0
AG011740-RA	264	107.713	0	0
AG011741-RA	210	63.5266	0	0
AG011742-RA	573	407.091	0	0
AG011743-RA	318	156.869	0	0
AG018213-RA	879	712.931	9.47237	0.181605
AG018279-RA	660	493.996	0	0
AG017924-RA	2262	2095.91	0	0
AG018189-RA	2091	1924.91	0	0
AG009161-RA	1221	1054.91	2044	26.4841
AG009162-RA	819	652.942	165	3.45403
AG009163-RA	384	220.12	16807.9	1043.69
AG009164-RA	585	419.077	49101	1601.45
AG009165-RA	1188	1021.91	2657	35.5384
AG009166-RA	234	82.26	3	0.498482
AG009167-RA	462	296.63	5706	262.926
AG009168-RA	2163	1996.91	1755	12.0126
AG009169-RA	492	326.423	189	7.91405
AG009170-RA	915	748.919	1747	31.8842
AG009171-RA	219	70.3347	34	6.60733
AG009172-RA	318	156.869	1	0.0871327
AG018641-RA	1614	1447.91	0	0
AG018157-RA	1143	976.905	0	0
AG017299-RA	471	305.555	0	0
AG015420-RA	1638	1471.91	10002	92.8804
AG015421-RA	1719	1552.91	50	0.440091
AG007227-RA	582	416.091	4	0.131398
AG007228-RA	2250	2083.91	2075	13.61
AG007229-RA	2721	2554.91	1111	5.94369
AG007230-RA	2700	2533.91	3513	18.9498
AG007231-RA	960	793.905	962	16.5624
AG007232-RA	2280	2113.91	7	0.0452616
AG007233-RA	2031	1864.91	2250	16.4908
AG019152-RA	225	75.0425	0	0
AG017940-RA	1581	1414.91	0	0
AG017321-RA	1431	1264.91	0	0
AG014210-RA	2811	2644.91	10	0.0516781
AG014211-RA	234	82.26	51	8.4742
AG017890-RA	1629	1462.91	0	0
AG006190-RA	639	473.005	8464	244.584
AG006191-RA	1266	1099.91	992	12.3275
AG006192-RA	324	162.552	2	0.168173
AG006193-RA	849	682.942	7	0.140098
AG006194-RA	366	202.638	2	0.134904
AG006195-RA	429	264.156	0	0
AG006196-RA	2052	1885.91	1331	9.64662
AG006197-RA	948	781.919	246	4.30022
AG006198-RA	1344	1177.91	2084	24.1827
AG006199-RA	501	335.362	10	0.407571
AG006200-RA	240	87.1894	13	2.03797
AG006201-RA	900	733.919	1190	22.1624
AG006202-RA	708	541.971	891	22.4708
AG006203-RA	1608	1441.91	2083	19.7456
AG006204-RA	2940	2773.91	3880	19.1186
AG006205-RA	468	302.58	985	44.4952
AG013098-RA	2943	2776.91	1350	6.64492
AG013099-RA	300	140.137	15	1.46303
AG013100-RA	1098	931.905	3	0.0440014
AG013101-RA	246	92.2042	6	0.889442
AG013102-RA	789	622.942	5	0.109708
AG013103-RA	345	182.475	12.1879	0.91294
AG013104-RA	1479	1312.91	4	0.0416432
AG013105-RA	804	637.942	250.9	5.37571
AG016005-RA	702	535.971	160	4.08034
AG016006-RA	807	640.942	93	1.98327
AG009631-RA	1305	1138.91	971	11.6533
AG009632-RA	1506	1339.91	6211	63.3584
AG009633-RA	1689	1522.91	2498	22.42
AG009634-RA	3159	2992.91	10267	46.8886
AG009635-RA	612	446.035	10719	328.475
AG009636-RA	1830	1663.91	2080	17.0864
AG009637-RA	651	485.005	22.9505	0.646789
AG019031-RA	2475	2308.91	0	0
AG011501-RA	1869	1702.91	485	3.89286
AG011502-RA	1248	1081.91	315	3.97959
AG011503-RA	1515	1348.91	4714	47.7667
AG011504-RA	1809	1642.91	2193	18.245
AG011505-RA	288	129.172	2756	291.628
AG011506-RA	1185	1018.91	8004	107.372
AG011507-RA	1227	1060.91	9	0.115953
AG018907-RA	1311	1144.91	0	0
AG009461-RA	1713	1546.91	405	3.57856
AG009462-RA	852	685.942	1157	23.0549
AG009463-RA	2721	2554.91	5422	29.0069
AG009464-RA	2010	1843.91	1567	11.6158
AG009465-RA	744	577.952	82479	1950.6
AG009466-RA	1611	1444.91	4896	46.3147
AG009467-RA	2778	2611.91	1182	6.18553
AG017817-RA	1176	1009.91	0	0
AG018922-RA	867	700.931	6	0.117002
AG017128-RA	1464	1297.91	0	0
AG018893-RA	2355	2188.91	3	0.0187332
AG014914-RA	408	243.553	1	0.0561207
AG014915-RA	228	77.4413	0	0
AG014916-RA	309	148.468	239	22.0031
AG014917-RA	741	574.952	23	0.546781
AG016266-RA	795	628.942	1	0.0217323
AG016267-RA	2208	2041.91	976	6.53328
AG016268-RA	1974	1807.91	10	0.0756034
AG018490-RA	309	148.468	0	0
AG006992-RA	288	129.172	0	0
AG006993-RA	2136	1969.91	2060	14.2935
AG006994-RA	1209	1042.91	2039	26.7233
AG006995-RA	387	223.06	0	0
AG006996-RA	1368	1201.91	0	0
AG006997-RA	204	59.1234	2	0.462368
AG006998-RA	285	126.433	0	0
AG006999-RA	900	733.919	13.0221	0.242521
AG007000-RA	213	65.6919	1	0.208068
AG007001-RA	234	82.26	38	6.31411
AG007002-RA	612	446.035	50.0445	1.53357
AG007003-RA	1188	1021.91	0	0
AG007004-RA	939	772.919	0	0
AG007005-RA	471	305.555	755	33.7734
AG007006-RA	2160	1993.91	1024	7.0196
AG018780-RA	1350	1183.91	0	0
AG015032-RA	582	416.091	1	0.0328495
AG015033-RA	2013	1846.91	1875	13.8763
AG015034-RA	690	523.979	1	0.0260857
AG015035-RA	393	228.901	483	28.8414
AG017666-RA	1695	1528.91	0	0
AG011414-RA	1116	949.905	587	8.44646
AG011415-RA	1137	970.905	1566	22.0461
AG011416-RA	3276	3109.91	1764.48	7.75508
AG011417-RA	699	532.971	1142	29.2873
AG011418-RA	522	356.236	1351	51.8364
AG011419-RA	378	214.302	5	0.318905
AG011420-RA	1989	1822.91	419	3.14172
AG001835-RA	4131	3964.91	13061	45.0257
AG001836-RA	318	156.869	13	1.13272
AG001837-RA	1596	1429.91	1504	14.3766
AG001838-RA	324	162.552	78	6.55873
AG001839-RA	1407	1240.91	2512	27.6693
AG001840-RA	351	188.222	7	0.508328
AG001841-RA	735	568.961	1999	48.0227
AG001842-RA	2553	2386.91	2636	15.0948
AG001843-RA	765	598.942	1134.41	25.8883
AG001844-RA	489	323.439	151.587	6.40599
AG001845-RA	2166	1999.91	4079	27.878
AG001846-RA	297	137.392	1	0.0994845
AG001847-RA	411	246.475	1	0.0554553
AG001848-RA	4278	4111.91	234	0.777839
AG001849-RA	687	520.979	4304	112.919
AG001850-RA	6678	6511.91	6030	12.6569
AG001851-RA	984	817.905	162	2.70725
AG001852-RA	2253	2086.91	9160	59.9943
AG001853-RA	1383	1216.91	6198	69.6164
AG001854-RA	240	87.1894	0	0
AG001855-RA	387	223.06	1	0.0612766
AG001856-RA	861	694.942	553	10.8766
AG001857-RA	1848	1681.91	1220	9.9146
AG001858-RA	1110	943.905	71287	1032.28
AG001859-RA	1113	946.905	7182	103.671
AG017724-RA	1389	1222.91	0	0
AG015229-RA	402	237.686	1	0.057506
AG015230-RA	1131	964.905	4.22765	0.0598868
AG015231-RA	249	94.7019	0	0
AG015232-RA	2388	2221.91	844	5.19199
AG015233-RA	1434	1267.91	433	4.66786
AG019172-RA	2364	2197.91	0	0
AG018913-RA	1599	1432.91	0	0
AG010670-RA	702	535.971	2230	56.8697
AG010671-RA	1920	1753.91	1370	10.6766
AG010672-RA	264	107.713	0	0
AG010673-RA	750	583.952	807	18.8892
AG010674-RA	900	733.919	1812	33.7464
AG010675-RA	1491	1324.91	4320	44.5673
AG010676-RA	588	422.07	769	24.9034
AG010677-RA	282	123.762	1	0.110441
AG019124-RA	1698	1531.91	0	0
AG018629-RA	2286	2119.91	2.3226	0.0149753
AG009315-RA	408	243.553	1112	62.4062
AG009316-RA	906	739.919	503	9.29183
AG009317-RA	963	796.905	80	1.37215
AG009318-RA	1404	1237.91	1530	16.8936
AG009319-RA	1611	1444.91	6697	63.3516
AG009320-RA	462	296.63	33	1.5206
AG009321-RA	1719	1552.91	0	0
AG009322-RA	507	341.317	1	0.040046
AG009323-RA	498	332.373	0	0
AG014640-RA	390	226.004	102	6.16881
AG014641-RA	327	165.382	83	6.85972
AG014642-RA	2823	2656.91	2303	11.8477
AG014854-RA	1587	1420.91	2	0.019239
AG014855-RA	300	140.137	142	13.85
AG014856-RA	1731	1564.91	3032	26.4824
AG014857-RA	348	185.342	1	0.0737468
AG014858-RA	276	118.385	16	1.84731
AG018849-RA	819	652.942	0	0
AG016919-RA	2208	2041.91	5	0.0334697
AG016920-RA	1515	1348.91	1	0.0101329
AG017696-RA	981	814.905	8.18667	0.137315
AG018355-RA	540	374.175	0	0
AG013021-RA	651	485.005	41	1.15546
AG013022-RA	585	419.077	18	0.587077
AG013023-RA	708	541.971	149	3.75775
AG013024-RA	282	123.762	101	11.1545
AG013025-RA	633	467.005	1959	57.3364
AG013026-RA	2202	2035.91	5896	39.5837
AG018518-RA	585	419.077	0	0
AG009419-RA	1425	1258.91	156	1.69375
AG009420-RA	2151	1984.91	128	0.881429
AG009421-RA	843	676.942	723	14.5983
AG009422-RA	3054	2887.91	2954	13.9812
AG009423-RA	5592	5425.91	5462.3	13.7601
AG009424-RA	3129	2962.91	1170	5.39741
AG015402-RA	801	634.942	1013	21.8068
AG015403-RA	987	820.905	477	7.94223
AG015404-RA	378	214.302	1	0.063781
AG017320-RA	1815	1648.91	0	0
AG018702-RA	1350	1183.91	48.6187	0.56131
AG018133-RA	1374	1207.91	0	0
AG017486-RA	771	604.942	2748	62.0897
AG005323-RA	4278	4111.91	3440	11.4349
AG005324-RA	1443	1276.91	19244	205.994
AG005325-RA	1635	1468.91	1367.19	12.7219
AG005326-RA	1326	1159.91	342.784	4.03938
AG005327-RA	225	75.0425	2.02822	0.369424
AG005328-RA	399	234.757	0	0
AG005329-RA	801	634.942	0	0
AG005330-RA	489	323.439	1	0.0422595
AG005331-RA	1020	853.905	22.1123	0.353949
AG005332-RA	2130	1963.91	1760.89	12.2554
AG005333-RA	1941	1774.91	4484	34.5309
AG005334-RA	714	547.971	2974	74.1824
AG005335-RA	3906	3739.91	1643.84	6.00779
AG017934-RA	663	496.996	0	0
AG012207-RA	2502	2335.91	3957	23.1541
AG012208-RA	2256	2089.91	3663	23.9567
AG012209-RA	711	544.971	4860	121.893
AG012210-RA	270	113.071	0	0
AG012211-RA	387	223.06	220	13.4809
AG019116-RA	3993	3826.91	4290	15.3224
AG014450-RA	693	526.979	3	0.0778116
AG014451-RA	3255	3088.91	5980	26.4614
AG018794-RA	1767	1600.91	0	0
AG006927-RA	1227	1060.91	118	1.52028
AG006928-RA	2742	2575.91	3446	18.2853
AG006929-RA	2532	2365.91	1260	7.27931
AG006930-RA	486	320.476	10	0.426502
AG006931-RA	930	763.919	541	9.67982
AG006932-RA	2541	2374.91	37.0253	0.213093
AG006933-RA	894	727.919	3022	56.7451
AG006934-RA	297	137.392	9727	967.685
AG006935-RA	2667	2500.91	7405	40.4711
AG006936-RA	2586	2419.91	7556	42.6786
AG015562-RA	2400	2233.91	3413	20.8828
AG015563-RA	1194	1027.91	512	6.80822
AG018822-RA	519	353.248	0	0
AG017160-RA	993	826.905	0	0
AG017215-RA	786	619.942	0	0
AG013667-RA	1824	1657.91	1414.5	11.6617
AG013668-RA	504	338.345	0.5	0.0201989
AG013669-RA	504	338.345	0.5	0.0201989
AG013670-RA	1824	1657.91	1414.5	11.6617
AG013671-RA	663	496.996	2551	70.1575
AG018041-RA	1749	1582.91	0	0
AG018388-RA	525	359.224	0	0
AG018851-RA	2397	2230.91	0	0
AG014991-RA	783	616.942	239	5.29506
AG014992-RA	3216	3049.91	2333	10.4555
AG008958-RA	3483	3316.91	3225	13.2897
AG008959-RA	1737	1570.91	1249	10.8675
AG008960-RA	978	811.905	66	1.11111
AG008961-RA	1722	1555.91	2177	19.1246
AG008962-RA	909	742.919	1252	23.0346
AG008963-RA	378	214.302	0	0
AG008964-RA	249	94.7019	0	0
AG008965-RA	1716	1549.91	1663	14.6657
AG008966-RA	1296	1129.91	1155	13.9719
AG000176-RA	3783	3616.91	486	1.83661
AG000177-RA	594	428.056	98	3.12927
AG000178-RA	1185	1018.91	2622	35.1735
AG000179-RA	1932	1765.91	6893	53.3529
AG000180-RA	1323	1156.91	974	11.5074
AG000181-RA	1452	1285.91	4779	50.7978
AG000182-RA	1374	1207.91	3481	39.3902
AG000183-RA	1332	1165.91	4	0.0468936
AG000184-RA	2199	2032.91	5210	35.0298
AG000185-RA	498	332.373	76	3.12539
AG000186-RA	408	243.553	223	12.5149
AG000187-RA	1254	1087.91	20	0.251279
AG000188-RA	249	94.7019	231	33.3404
AG000189-RA	837	670.942	372	7.57835
AG000190-RA	1254	1087.91	1109	13.9334
AG000191-RA	411	246.475	36471	2022.51
AG000192-RA	4032	3865.91	473	1.67235
AG000193-RA	1359	1192.91	76	0.870812
AG000194-RA	1374	1207.91	183	2.07079
AG000195-RA	717	550.971	61	1.51328
AG000196-RA	1338	1171.91	3448	40.2153
AG000197-RA	840	673.942	11.4656	0.232536
AG000198-RA	585	419.077	240	7.8277
AG000199-RA	957	790.905	152	2.62685
AG000200-RA	1053	886.905	4.31969	0.066572
AG000201-RA	627	461.005	22	0.652281
AG000202-RA	3564	3397.91	190.524	0.766398
AG000203-RA	16044	15877.9	5977.91	5.14604
AG000204-RA	258	102.478	127	16.9392
AG000205-RA	291	131.89	210	21.7633
AG000206-RA	2661	2494.91	877	4.80466
AG000207-RA	1986	1819.91	2071	15.5542
AG000208-RA	528	362.218	52	1.96223
AG019067-RA	2055	1888.91	0	0
AG010345-RA	1089	922.905	61	0.90342
AG010346-RA	537	371.187	0	0
AG010347-RA	675	508.988	6	0.161124
AG010348-RA	1263	1096.91	37	0.461052
AG010349-RA	1245	1078.91	0	0
AG010350-RA	2160	1993.91	47	0.322189
AG010351-RA	339	176.763	1	0.0773259
AG010352-RA	243	89.6835	4	0.609627
AG010353-RA	342	179.616	0	0
AG010354-RA	453	287.752	0	0
AG010355-RA	1185	1018.91	0	0
AG010356-RA	258	102.478	5	0.666896
AG018678-RA	1944	1777.91	0	0
AG008219-RA	2211	2044.91	3285.62	21.9615
AG008220-RA	4056	3889.91	3973	13.9604
AG008221-RA	198	54.8018	35	8.72952
AG008222-RA	570	404.105	62140	2101.81
AG008223-RA	5907	5740.91	1421	3.38322
AG008224-RA	228	77.4413	358	63.1869
AG008225-RA	438	272.986	3	0.15021
AG008226-RA	1989	1822.91	737	5.52612
AG008227-RA	1701	1534.91	2806	24.9875
AG018367-RA	1680	1513.91	1	0.00902856
AG018857-RA	2439	2272.91	0	0
AG017748-RA	651	485.005	6382	179.857
AG014963-RA	1305	1138.91	2453	29.4393
AG014964-RA	1965	1798.91	1127	8.56313
AG014965-RA	273	115.74	38	4.48761
AG014966-RA	303	142.931	8	0.765031
AG017892-RA	1332	1165.91	83	0.973043
AG014263-RA	3855	3688.91	9622	35.6521
AG014264-RA	375	211.409	191	12.3489
AG014265-RA	780	613.942	75	1.66975
AG018188-RA	342	179.616	5	0.380489
AG011828-RA	261	105.053	276	35.9103
AG011829-RA	2625	2458.91	3957	21.9959
AG011830-RA	2229	2062.91	3095	20.5068
AG011831-RA	2142	1975.91	3903	26.9991
AG011832-RA	1170	1003.91	179	2.43712
AG016932-RA	555	389.124	0	0
AG011202-RA	120	15.4316	394	348.982
AG011203-RA	366	202.638	345	23.271
AG011204-RA	1281	1114.91	105	1.28727
AG011205-RA	1137	970.905	109	1.5345
AG011206-RA	243	89.6835	51	7.77275
AG011207-RA	273	115.74	1	0.118095
AG011208-RA	207	61.3367	6	1.33705
AG011209-RA	1542	1375.91	113	1.12255
AG011210-RA	297	137.392	13	1.2933
AG011211-RA	390	226.004	501	30.2998
AG011212-RA	756	589.942	3	0.069507
AG011213-RA	414	249.422	427	23.3997
AG011214-RA	363	199.75	183	12.5222
AG009839-RA	237	84.7074	0	0
AG009840-RA	606	440.035	0	0
AG009841-RA	1737	1570.91	91	0.791787
AG009842-RA	1122	955.905	32	0.457564
AG009843-RA	810	643.942	1434	30.4382
AG009844-RA	1158	991.905	1133	15.6127
AG009845-RA	1926	1759.91	26	0.20193
AG009846-RA	2523	2356.91	1909	11.0708
AG009847-RA	486	320.476	1.1834	0.0504724
AG009848-RA	666	499.996	0	0
AG018172-RA	714	547.971	0	0
AG018115-RA	1533	1366.91	0	0
AG008502-RA	2814	2647.91	2006	10.3549
AG008503-RA	2124	1957.91	1	0.00698112
AG008504-RA	507	341.317	0	0
AG008505-RA	369	205.559	0	0
AG008506-RA	366	202.638	0	0
AG008507-RA	5793	5626.91	2573	6.2501
AG008508-RA	1389	1222.91	952	10.6405
AG008509-RA	930	763.919	887	15.8706
AG015548-RA	1389	1222.91	4816	53.8283
AG015549-RA	1290	1123.91	339	4.12275
AG015550-RA	588	422.07	236	7.64266
AG018556-RA	2094	1927.91	2	0.0141795
AG014020-RA	744	577.952	510302	12068.5
AG014021-RA	2346	2179.91	5468	34.2853
AG014022-RA	1239	1072.91	162	2.06381
AG014023-RA	1293	1126.91	1899	23.0332
AG005430-RA	417	252.363	0	0
AG005431-RA	3018	2851.91	0	0
AG005432-RA	579	413.091	0	0
AG005433-RA	729	562.961	0	0
AG005434-RA	549	383.131	0	0
AG005435-RA	756	589.942	1	0.023169
AG005436-RA	1533	1366.91	0	0
AG005437-RA	435	270.04	0	0
AG005438-RA	2307	2140.91	14	0.0893815
AG005439-RA	1137	970.905	0	0
AG005440-RA	603	437.035	1	0.0312753
AG005441-RA	183	44.5175	0	0
AG005442-RA	255	99.8736	0	0
AG005443-RA	261	105.053	1	0.13011
AG005444-RA	282	123.762	0	0
AG005445-RA	711	544.971	1.2274	0.0307843
AG005446-RA	909	742.919	0	0
AG005447-RA	858	691.942	0	0
AG005448-RA	231	79.8665	0	0
AG005449-RA	234	82.26	0	0
AG005450-RA	2325	2158.91	7	0.0443181
AG005451-RA	3387	3220.91	1	0.00424365
AG019073-RA	2469	2302.91	0	0
AG016410-RA	1611	1444.91	0	0
AG016407-RA	474	308.544	9	0.398696
AG016408-RA	957	790.905	399	6.89549
AG016409-RA	957	790.905	3729	64.4444
AG018293-RA	1803	1636.91	0	0
AG006602-RA	426	261.2	19	0.994254
AG006603-RA	201	56.9655	8	1.91953
AG006604-RA	276	118.385	0	0
AG006605-RA	675	508.988	1072	28.7875
AG006606-RA	1281	1114.91	1160	14.2212
AG006607-RA	303	142.931	13569	1297.59
AG006608-RA	402	237.686	107	6.15315
AG006609-RA	2238	2071.91	174	1.14788
AG006610-RA	1992	1825.91	1002	7.50078
AG006611-RA	891	724.919	175	3.29963
AG006612-RA	4158	3991.91	2952	10.1077
AG006613-RA	1098	931.905	2515	36.8878
AG006614-RA	3918	3751.91	3150	11.4756
AG017760-RA	633	467.005	0	0
AG006915-RA	2808	2641.91	31726	164.14
AG006916-RA	381	217.208	1125	70.7937
AG006917-RA	1617	1450.91	4355	41.0267
AG006918-RA	828	661.942	7208	148.837
AG006919-RA	531	365.212	195	7.29805
AG006920-RA	2748	2581.91	32229	170.617
AG006921-RA	2388	2221.91	3484	21.4323
AG006922-RA	345	182.475	1657	124.118
AG006923-RA	1842	1675.91	1363	11.1164
AG006924-RA	651	485.005	2306	64.9876
AG006925-RA	621	455.012	961	28.868
AG006926-RA	198	54.8018	0	0
AG001791-RA	1839	1672.91	916	7.48413
AG001792-RA	186	46.5575	0	0
AG001793-RA	1431	1264.91	663	7.16428
AG001794-RA	1701	1534.91	1780.65	15.8568
AG001795-RA	4323	4156.91	2239	7.36209
AG001796-RA	6234	6067.91	22806	51.3721
AG001797-RA	1575	1408.91	23	0.223133
AG001798-RA	213	65.6919	0	0
AG001799-RA	276	118.385	0	0
AG001800-RA	1431	1264.91	3378	36.5022
AG001801-RA	1176	1009.91	5	0.0676716
AG001802-RA	1275	1108.91	847	10.4401
AG001803-RA	1122	955.905	1	0.0142989
AG001804-RA	1059	892.905	24	0.367386
AG001805-RA	912	745.919	1009	18.4891
AG001806-RA	231	79.8665	2	0.342281
AG001807-RA	1989	1822.91	699	5.24119
AG001808-RA	729	562.961	460	11.1685
AG001809-RA	1245	1078.91	28	0.354725
AG001810-RA	1428	1261.91	1152	12.4779
AG001811-RA	240	87.1894	87	13.6387
AG001812-RA	7332	7165.91	4220	8.04931
AG019025-RA	1599	1432.91	0	0
AG013293-RA	237	84.7074	5	0.806799
AG013294-RA	1338	1171.91	435	5.07357
AG013295-RA	195	52.6923	133	34.5002
AG013296-RA	2799	2632.91	2833	14.7071
AG005085-RA	1305	1138.91	1506.9	18.0848
AG005086-RA	453	287.752	1670.1	79.3307
AG005087-RA	462	296.63	246	11.3354
AG005088-RA	5913	5746.91	2842	6.75938
AG005089-RA	1194	1027.91	1633	21.7145
AG005090-RA	3321	3154.91	26021	112.734
AG005091-RA	1602	1435.91	7461	71.0212
AG005092-RA	1269	1102.91	2073	25.6908
AG005093-RA	1185	1018.91	2571	34.4894
AG005094-RA	2769	2602.91	584	3.0667
AG012882-RA	4761	4594.91	7197.7	21.4109
AG012883-RA	1356	1189.91	476	5.46779
AG012884-RA	699	532.971	11493	294.745
AG012885-RA	2379	2212.91	26	0.160593
AG018669-RA	567	401.105	0	0
AG009624-RA	753	586.952	2055	47.8549
AG009625-RA	1419	1252.91	1479	16.1349
AG009626-RA	1806	1639.91	6	0.0500092
AG009627-RA	228	77.4413	423	74.6594
AG009628-RA	4866	4699.91	9430	27.4246
AG009629-RA	1269	1102.91	27	0.334613
AG009630-RA	1173	1006.91	0	0
AG017896-RA	1980	1813.91	0	0
AG017409-RA	558	392.111	19	0.66231
AG017077-RA	645	479.005	0	0
AG017078-RA	477	311.534	1	0.0438744
AG017901-RA	180	42.5637	0	0
AG017902-RA	198	54.8018	0	0
AG018924-RA	261	105.053	1	0.13011
AG018028-RA	486	320.476	0	0
AG018399-RA	609	443.035	0	0
AG015469-RA	5136	4969.91	5935	16.3226
AG018836-RA	1887	1720.91	0	0
AG017797-RA	594	428.056	0	0
AG006747-RA	543	377.162	0	0
AG006748-RA	822	655.942	0	0
AG006749-RA	972	805.905	1	0.0169603
AG006750-RA	231	79.8665	0	0
AG006751-RA	537	371.187	0	0
AG006752-RA	1023	856.905	0	0
AG006753-RA	354	191.107	0	0
AG006754-RA	432	267.103	0	0
AG006755-RA	471	305.555	1	0.044733
AG006756-RA	522	356.236	0	0
AG006757-RA	1686	1519.91	1	0.00899291
AG006758-RA	1011	844.905	0	0
AG006759-RA	447	281.838	0	0
AG006760-RA	234	82.26	1	0.166161
AG006761-RA	414	249.422	0	0
AG006762-RA	288	129.172	0	0
AG006763-RA	303	142.931	0	0
AG006764-RA	1356	1189.91	18	0.206765
AG006765-RA	2382	2215.91	4277	26.3818
AG006766-RA	330	168.213	1542	125.298
AG006767-RA	288	129.172	14	1.48142
AG018923-RA	1350	1183.91	0	0
AG010038-RA	2013	1846.91	6136	45.4107
AG010039-RA	597	431.042	407	12.906
AG010040-RA	1596	1429.91	9732	93.0276
AG010041-RA	402	237.686	1473	84.7064
AG010042-RA	264	107.713	2850	361.654
AG010043-RA	1995	1828.91	2680	20.0291
AG010044-RA	543	377.162	1806	65.4495
AG010045-RA	621	455.012	900	27.0356
AG010046-RA	11544	11377.9	32040	38.4899
AG004969-RA	1059	892.905	1033	15.8129
AG004970-RA	2025	1858.91	974	7.16174
AG004971-RA	318	156.869	1	0.0871327
AG004972-RA	441	275.94	56688	2807.98
AG004973-RA	2070	1903.91	9215	66.1557
AG004974-RA	1644	1477.91	2868	26.5246
AG004975-RA	966	799.905	612.383	10.4641
AG004976-RA	4251	4084.91	7462.62	24.9704
AG004977-RA	1320	1153.91	7276	86.1866
AG004978-RA	1866	1699.91	3211	25.8186
AG004979-RA	3801	3634.91	1703	6.40381
AG017740-RA	2055	1888.91	0	0
AG018914-RA	1869	1702.91	0	0
AG010858-RA	1578	1411.91	195.489	1.89249
AG010859-RA	1137	970.905	1286	18.1043
AG010860-RA	336	173.897	606	47.6319
AG010861-RA	417	252.363	708	38.3464
AG010862-RA	1257	1090.91	2232	27.9656
AG010863-RA	834	667.942	4616	94.4591
AG010864-RA	1635	1468.91	6868	63.9077
AG018843-RA	2355	2188.91	0	0
AG012548-RA	576	410.091	230.796	7.69245
AG012549-RA	1509	1342.91	3050	31.0436
AG012550-RA	4041	3874.91	10	0.0352741
AG012551-RA	3726	3559.91	4721	18.1264
AG010979-RA	2148	1981.91	5061	34.9036
AG010980-RA	2571	2404.91	1786	10.1508
AG010981-RA	1398	1231.91	2202.48	24.4372
AG010982-RA	1392	1225.91	881	9.82282
AG010983-RA	2433	2266.91	2309	13.9222
AG014522-RA	921	754.919	118	2.13648
AG014523-RA	1314	1147.91	619	7.37058
AG014524-RA	855	688.942	59	1.17054
AG014525-RA	1212	1045.91	73	0.953998
AG014526-RA	1140	973.905	416	5.8384
AG017632-RA	1569	1402.91	0	0
AG011833-RA	486	320.476	1176	50.1566
AG011834-RA	831	664.942	1461	30.0319
AG011835-RA	2961	2794.91	9476	46.342
AG011836-RA	1971	1804.91	482	3.65014
AG011837-RA	1746	1579.91	4231	36.604
AG019166-RA	2028	1861.91	0	0
AG018349-RA	2283	2116.91	0	0
AG012566-RA	1476	1309.91	630	6.57382
AG012567-RA	765	598.942	213	4.86084
AG012568-RA	579	413.091	722	23.8896
AG012569-RA	180	42.5637	195	62.6199
AG012570-RA	462	296.63	1790	82.4813
AG017672-RA	1173	1006.91	0	0
AG008574-RA	1515	1348.91	3492	35.3842
AG008575-RA	114	14.4512	120	113.5
AG008576-RA	699	532.971	4165	106.814
AG008577-RA	1563	1396.91	3266	31.957
AG008578-RA	1179	1012.91	1171	15.8017
AG008579-RA	234	82.26	995	165.33
AG008580-RA	1326	1159.91	2500	29.4601
AG008581-RA	909	742.919	1004	18.4718
AG008582-RA	747	580.952	236	5.5525
AG008583-RA	2466	2299.91	2342	13.9185
AG016181-RA	2673	2506.91	69	0.376208
AG016182-RA	1200	1033.91	395	5.22196
AG016183-RA	660	493.996	654	18.0955
AG015004-RA	423	258.261	3	0.158774
AG015005-RA	288	129.172	0	0
AG015006-RA	1002	835.905	21	0.343383
AG011367-RA	2793	2626.91	285.712	1.48662
AG011368-RA	1095	928.905	15	0.220718
AG011369-RA	2166	1999.91	410	2.80215
AG011370-RA	891	724.919	24479	461.553
AG011371-RA	930	763.919	13137	235.053
AG011372-RA	3675	3508.91	4107	15.9982
AG011373-RA	591	425.063	2607	83.831
AG011374-RA	1233	1066.91	3751	48.055
AG002011-RA	1056	889.905	4046	62.144
AG002012-RA	1536	1369.91	2517	25.1136
AG002013-RA	234	82.26	158	26.2534
AG002014-RA	1827	1660.91	1898	15.6195
AG002015-RA	1005	838.905	1342	21.8654
AG002016-RA	2730	2563.91	46695	248.935
AG002017-RA	444	278.88	802	39.3074
AG002018-RA	1080	913.905	1827	27.3246
AG002019-RA	1032	865.905	4350	68.6651
AG002020-RA	2025	1858.91	3910.02	28.7501
AG002021-RA	1452	1285.91	790.977	8.40759
AG002022-RA	990	823.905	2394	39.7158
AG002023-RA	411	246.475	9606	532.704
AG002024-RA	1131	964.905	799	11.3182
AG002025-RA	1347	1180.91	26967	312.129
AG002026-RA	1521	1354.91	2055	20.731
AG002027-RA	420	255.299	15	0.80308
AG002028-RA	1608	1441.91	32	0.30334
AG002029-RA	2004	1837.91	46	0.342099
AG002030-RA	216	68.025	10	2.00932
AG002031-RA	1272	1105.91	603	7.45275
AG002032-RA	822	655.942	26	0.541782
AG002033-RA	1185	1018.91	2401	32.2089
AG002034-RA	1023	856.905	2222	35.4428
AG002035-RA	903	736.919	269	4.98942
AG002036-RA	990	823.905	722	11.9778
AG002037-RA	936	769.919	103	1.82856
AG002038-RA	1290	1123.91	8	0.097292
AG018739-RA	2355	2188.91	0	0
[truncated: 17,183 more rows]

## Sheet: A_gly_v2
Gene ID	CDS length	Effective length	Estimated count	TPM
scaffold_1.g1.t1	339	175.468	3.72444	0.346362
scaffold_1.g2.t1	738	571.028	0	0
scaffold_1.g3.t1	315	152.718	0	0
scaffold_1.g4.t1	1647	1479.99	14.4284	0.159083
scaffold_1.g5.t1	960	792.994	0	0
scaffold_1.g6.t1	858	691.011	6.25394	0.147685
scaffold_1.g7.t1	999	831.994	3	0.0588393
scaffold_1.g8.t1	768	601.028	7	0.190051
scaffold_1.g9.t1	1188	1020.99	24	0.383579
scaffold_1.g10.t1	1947	1779.99	27.4159	0.251334
scaffold_1.g11.t1	294	133.334	3	0.367152
scaffold_1.g12.t1	264	106.634	1.86793	0.285846
scaffold_1.g13.t1	366	201.4	3	0.243068
scaffold_1.g14.t1	366	201.4	1	0.0810228
scaffold_1.g15.t1	255	98.8288	5	0.825569
scaffold_1.g16.t1	330	166.901	2	0.195541
scaffold_1.g17.t1	933	765.994	8.13207	0.173238
scaffold_1.g18.t1	2256	2088.99	130.73	1.02118
scaffold_1.g19.t1	984	816.994	1100	21.9705
scaffold_1.g20.t1	870	702.994	324	7.52073
scaffold_1.g21.t1	3354	3186.99	8381.27	42.9136
scaffold_1.g22.t1	213	64.5638	4	1.01097
scaffold_1.g23.t1	2661	2493.99	235.466	1.54063
scaffold_1.g23.t2	2646	2478.99	1666.53	10.97
scaffold_1.g24.t1	666	499.055	34052	1113.42
scaffold_1.g25.t1	504	337.335	1546	74.785
scaffold_1.g26.t1	1113	945.994	4832	83.3499
scaffold_1.g27.t1	279	119.814	13	1.77053
scaffold_1.g28.t1	1296	1128.99	130	1.87896
scaffold_1.g29.t1	2316	2148.99	4757.96	36.1287
scaffold_1.g30.t1	2310	2142.99	1663.22	12.6647
scaffold_1.g31.t1	2535	2367.99	284.61	1.96127
scaffold_1.g32.t1	894	726.994	212	4.75852
scaffold_1.g33.t1	639	472.055	377.67	13.0553
scaffold_1.g34.t1	1545	1377.99	637.323	7.54708
scaffold_1.g34.t2	1563	1395.99	797.435	9.32134
scaffold_1.g34.t3	1440	1272.99	545.117	6.98764
scaffold_1.g35.t1	981	813.994	461.223	9.24605
scaffold_1.g36.t1	852	685.028	472.82	11.263
scaffold_1.g37.t1	1569	1401.99	14542	169.256
scaffold_1.g38.t1	885	717.994	5890	133.863
scaffold_1.g39.t1	3255	3087.99	0	0
scaffold_1.g39.t2	3537	3369.99	8824.45	42.7292
scaffold_1.g40.t1	318	155.564	0	0
scaffold_1.g41.t1	1656	1488.99	0	0
scaffold_1.g42.t1	1734	1566.99	231.385	2.40954
scaffold_1.g43.t1	6819	6651.99	9528.6	23.3746
scaffold_1.g44.t1	681	514.055	382	12.1261
scaffold_1.g45.t1	1569	1401.99	21.3381	0.248356
scaffold_1.g46.t1	951	783.994	2	0.0416278
scaffold_1.g47.t1	1212	1044.99	146	2.27985
scaffold_1.g48.t1	1305	1137.99	0	0
scaffold_1.g49.t1	909	741.994	7	0.153945
scaffold_1.g50.t1	492	325.384	1	0.0501499
scaffold_1.g51.t1	498	331.352	9	0.443221
scaffold_1.g52.t1	462	295.555	1	0.0552114
scaffold_1.g53.t1	1662	1494.99	1	0.0109151
scaffold_1.g54.t1	237	83.6239	120	23.4163
scaffold_1.g55.t1	1596	1428.99	2422	27.6573
scaffold_1.g56.t1	663	496.055	3316	109.081
scaffold_1.g57.t1	1992	1824.99	332.379	2.97193
scaffold_1.g57.t2	1107	939.994	612.803	10.6381
scaffold_1.g57.t3	951	783.994	123.818	2.57715
scaffold_1.g58.t1	345	181.188	1020	91.8622
scaffold_1.g59.t1	4758	4590.99	1347.03	4.78781
scaffold_1.g59.t2	4698	4530.99	5170.97	18.6228
scaffold_1.g60.t1	1641	1473.99	199	2.20305
scaffold_1.g61.t1	345	181.188	32	2.88195
scaffold_1.g62.t1	1407	1239.99	93	1.22386
scaffold_1.g63.t1	2400	2232.99	1972	14.4107
scaffold_1.g64.t1	669	502.055	1329.21	43.2025
scaffold_1.g64.t2	657	490.055	4829.79	160.823
scaffold_1.g65.t1	2478	2310.99	1041	7.35053
scaffold_1.g66.t1	5193	5025.99	5110	16.5907
scaffold_1.g67.t1	774	607.028	1402	37.6882
scaffold_1.g68.t1	369	204.329	7	0.55903
scaffold_1.g69.t1	1317	1149.99	327	4.64001
scaffold_1.g70.t1	1326	1158.99	801	11.2776
scaffold_1.g71.t1	465	298.532	717	39.1917
scaffold_1.g72.t1	294	133.334	1	0.122384
scaffold_1.g73.t1	1827	1659.99	110.814	1.08932
scaffold_1.g74.t1	246	91.1684	5	0.894937
scaffold_1.g75.t1	1014	846.994	131	2.52382
scaffold_1.g76.t1	927	759.994	3409	73.1954
scaffold_1.g77.t1	867	699.994	4534	105.695
scaffold_1.g78.t1	579	412.11	1853	73.3717
scaffold_1.g79.t1	1353	1185.99	1380	18.9873
scaffold_1.g80.t1	1950	1782.99	14	0.128128
scaffold_1.g81.t1	1695	1527.99	4040	43.1446
scaffold_1.g82.t1	345	181.188	0	0
scaffold_1.g83.t1	4875	4707.99	2353	8.15554
scaffold_1.g84.t1	2538	2370.99	4212	28.9884
scaffold_1.g85.t1	957	789.994	13167	271.975
scaffold_1.g86.t1	888	720.994	7475	169.179
scaffold_1.g87.t1	1074	906.994	490	8.81573
scaffold_1.g88.t1	2427	2259.99	2097	15.1411
scaffold_1.g89.t1	918	750.994	63	1.3689
scaffold_1.g90.t1	309	147.154	0	0
scaffold_1.g91.t1	291	130.593	0	0
scaffold_1.g92.t1	267	109.277	1	0.149326
scaffold_1.g93.t1	342	178.329	0	0
scaffold_1.g94.t1	303	141.607	4	0.460938
scaffold_1.g95.t1	267	109.277	0	0
scaffold_1.g96.t1	351	186.941	7	0.611025
scaffold_1.g97.t1	1824	1656.99	385	3.79146
scaffold_1.g98.t1	258	101.441	24	3.86069
scaffold_1.g99.t1	1779	1611.99	1849.51	18.7223
scaffold_1.g100.t1	318	155.564	7	0.734267
scaffold_1.g101.t1	894	726.994	474	10.6393
scaffold_1.g102.t1	423	257.075	0	0
scaffold_1.g103.t1	729	562.043	3	0.0871001
scaffold_1.g104.t1	594	427.089	599	22.8863
scaffold_1.g105.t1	1392	1224.99	3201	42.6401
scaffold_1.g106.t1	2013	1845.99	3948	34.899
scaffold_1.g107.t1	1212	1044.99	25	0.390385
scaffold_1.g108.t1	1062	894.994	2121	38.6712
scaffold_1.g109.t1	1527	1359.99	709	8.50699
scaffold_1.g110.t1	1002	834.994	1243	24.2915
scaffold_1.g111.t1	930	762.994	1922	41.1054
scaffold_1.g112.t1	1566	1398.99	1452	16.9363
scaffold_1.g113.t1	1647	1479.99	966	10.6508
scaffold_1.g114.t1	741	574.028	115	3.26912
scaffold_1.g115.t1	1806	1638.99	4726	47.0525
scaffold_1.g116.t1	2556	2388.99	1682	11.4889
scaffold_1.g117.t1	1602	1434.99	788	8.96072
scaffold_1.g118.t1	978	810.994	49	0.985928
scaffold_1.g119.t1	459	292.577	53311	2973.33
scaffold_1.g120.t1	1569	1401.99	1479	17.2143
scaffold_1.g121.t1	5418	5250.99	65.6428	0.203992
scaffold_1.g121.t2	5430	5262.99	598.184	1.85468
scaffold_1.g121.t3	5388	5220.99	222.173	0.694393
scaffold_1.g122.t1	327	164.044	13	1.29316
scaffold_1.g123.t1	2064	1896.99	234	2.01287
scaffold_1.g124.t1	318	155.564	9	0.944058
scaffold_1.g125.t1	501	334.343	13	0.634479
scaffold_1.g126.t1	378	213.045	15	1.14891
scaffold_1.g127.t1	5526	5358.99	654	1.99141
scaffold_1.g128.t1	258	101.441	3	0.482586
scaffold_1.g129.t1	492	325.384	2563	128.534
scaffold_1.g130.t1	2439	2271.99	4019.34	28.8679
scaffold_1.g130.t2	2448	2280.99	1589.66	11.3722
scaffold_1.g131.t1	225	74.0054	12	2.64597
scaffold_1.g132.t1	861	694.011	121	2.84502
scaffold_1.g133.t1	1536	1368.99	35	0.417189
scaffold_1.g134.t1	1200	1032.99	2256	35.6376
scaffold_1.g135.t1	3393	3225.99	1871	9.46405
scaffold_1.g136.t1	2256	2088.99	3221	25.1606
scaffold_1.g137.t1	699	532.043	1280	39.2582
scaffold_1.g138.t1	201	55.8409	27	7.89002
scaffold_1.g139.t1	1083	915.994	259	4.61396
scaffold_1.g140.t1	1797	1629.99	340	3.40376
scaffold_1.g141.t1	1770	1602.99	1804	18.3642
scaffold_1.g142.t1	768	601.028	36	0.977404
scaffold_1.g143.t1	612	445.078	965	35.38
scaffold_1.g144.t1	1539	1371.99	7604	90.4392
scaffold_1.g145.t1	633	466.055	145	5.07688
scaffold_1.g146.t1	705	538.043	284	8.61327
scaffold_1.g147.t1	273	114.52	164	23.3684
scaffold_1.g148.t1	1878	1710.99	2875	27.4193
scaffold_1.g149.t1	2274	2106.99	3601	27.8886
scaffold_1.g150.t1	654	487.055	158	5.29353
scaffold_1.g151.t1	3864	3696.99	3213	14.1817
scaffold_1.g152.t1	945	777.994	2986	62.6297
scaffold_1.g153.t1	885	717.994	3920	89.0906
scaffold_1.g154.t1	573	406.11	145	5.82627
scaffold_1.g155.t1	810	643.028	941	23.8795
scaffold_1.g156.t1	564	397.12	2486	102.152
scaffold_1.g157.t1	1974	1806.99	7942	71.7199
scaffold_1.g158.t1	216	66.9156	96	23.4105
scaffold_1.g159.t1	4227	4059.99	2943	11.8285
scaffold_1.g160.t1	2697	2529.99	1968	12.6932
scaffold_1.g161.t1	3558	3390.99	4256	20.4805
scaffold_1.g162.t1	261	104.022	2	0.31374
scaffold_1.g163.t1	1341	1173.99	32.1851	0.447359
scaffold_1.g163.t2	1344	1176.99	92.9786	1.28907
scaffold_1.g164.t1	315	152.718	74	7.90695
scaffold_1.g165.t1	1419	1251.99	302.706	3.94535
scaffold_1.g165.t2	1422	1254.99	917.294	11.9271
scaffold_1.g166.t1	1716	1548.99	1661	17.4979
scaffold_1.g167.t1	225	74.0054	1	0.220497
scaffold_1.g168.t1	4113	3945.99	609.518	2.52056
scaffold_1.g168.t2	4023	3855.99	1972.48	8.34725
scaffold_1.g169.t1	348	184.082	717	63.5586
scaffold_1.g170.t1	432	265.937	15	0.920404
scaffold_1.g171.t1	5865	5697.99	1272	3.64277
scaffold_1.g172.t1	2616	2448.99	643	4.2844
scaffold_1.g173.t1	843	676.028	870	21.0001
scaffold_1.g174.t1	1119	951.994	347	5.94788
scaffold_1.g175.t1	3000	2832.99	2317	13.3459
scaffold_1.g176.t1	1659	1491.99	659	7.20751
scaffold_1.g177.t1	1152	984.994	875	14.4958
scaffold_1.g178.t1	927	759.994	4088	87.7743
scaffold_1.g179.t1	291	130.593	638	79.7201
scaffold_1.g180.t1	1779	1611.99	14610	147.895
scaffold_1.g181.t1	1188	1020.99	4082	65.2404
scaffold_1.g182.t1	957	789.994	176	3.63543
scaffold_1.g183.t1	3861	3693.99	10487	46.3257
scaffold_1.g184.t1	405	239.379	1378	93.9356
scaffold_1.g185.t1	516	349.267	187	8.73677
scaffold_1.g186.t1	621	454.067	4656	167.325
scaffold_1.g187.t1	1083	915.994	1389	24.7444
scaffold_1.g188.t1	1239	1071.99	8980	136.694
scaffold_1.g189.t1	8826	8658.99	3548	6.68625
scaffold_1.g190.t1	324	161.234	214	21.6583
scaffold_1.g191.t1	618	451.067	3594	130.018
scaffold_1.g192.t1	1941	1773.99	311.092	2.86156
scaffold_1.g192.t2	1749	1581.99	22.9083	0.236295
scaffold_1.g193.t1	1554	1386.99	1138	13.3886
scaffold_1.g194.t1	243	88.626	73	13.4409
scaffold_1.g195.t1	333	169.756	208	19.9942
scaffold_1.g196.t1	531	364.214	47.5	2.12816
scaffold_1.g197.t1	531	364.214	47.5	2.12816
scaffold_1.g198.t1	357	192.683	1365	115.6
scaffold_1.g199.t1	1377	1209.99	2	0.026972
scaffold_1.g200.t1	1116	948.994	1096	18.8458
scaffold_1.g201.t1	1263	1095.99	3596	53.54
scaffold_1.g202.t1	219	69.2679	2569	605.199
scaffold_1.g203.t1	510	343.267	139	6.60769
scaffold_1.g204.t1	846	679.028	1432	34.4129
scaffold_1.g205.t1	525	358.223	520	23.6874
scaffold_1.g206.t1	291	130.593	0	0
scaffold_1.g207.t1	2142	1974.99	10197	84.2507
scaffold_1.g208.t1	348	184.082	28	2.48206
scaffold_1.g209.t1	720	553.043	5446	160.689
scaffold_1.g210.t1	786	619.028	1302	34.3216
scaffold_1.g211.t1	1167	999.994	2651	43.2593
scaffold_1.g212.t1	1131	963.994	190	3.21622
scaffold_1.g213.t1	1242	1074.99	930	14.117
scaffold_1.g214.t1	786	619.028	2031	53.5385
scaffold_1.g215.t1	1185	1017.99	0	0
scaffold_1.g216.t1	249	93.6778	59	10.2774
scaffold_1.g217.t1	648	481.055	1536	52.103
scaffold_1.g218.t1	1263	1095.99	149	2.21843
scaffold_1.g219.t1	2811	2643.99	5110	31.5375
scaffold_1.g220.t1	432	265.937	206	12.6402
scaffold_1.g221.t1	765	598.028	1495	40.793
scaffold_1.g222.t1	1164	996.994	5994	98.1049
scaffold_1.g223.t1	1599	1431.99	3174	36.1687
scaffold_1.g224.t1	1539	1371.99	4942	58.7783
scaffold_1.g225.t1	1347	1179.99	8901	123.091
scaffold_1.g226.t1	1440	1272.99	1728	22.1505
scaffold_1.g227.t1	1137	969.994	1637.21	27.5425
scaffold_1.g227.t2	960	792.994	246.786	5.07829
scaffold_1.g228.t1	669	502.055	1685.04	54.7679
scaffold_1.g228.t2	975	807.994	913.957	18.458
scaffold_1.g229.t1	1593	1425.99	902	10.3218
scaffold_1.g230.t1	333	169.756	319.254	30.6886
scaffold_1.g231.t1	933	765.994	1598	34.0422
scaffold_1.g232.t1	735	568.043	1068	30.6801
scaffold_1.g233.t1	1560	1392.99	1547	18.1221
scaffold_1.g234.t1	1410	1242.99	781	10.2529
scaffold_1.g235.t1	1197	1029.99	296	4.68947
scaffold_1.g236.t1	234	81.1858	51	10.2508
scaffold_1.g237.t1	2031	1863.99	2152	18.8393
scaffold_1.g238.t1	1467	1299.99	4	0.0502094
scaffold_1.g239.t1	1695	1527.99	23.0741	0.246416
scaffold_1.g240.t1	1761	1593.99	300.926	3.08063
scaffold_1.g241.t1	1566	1398.99	218	2.54277
scaffold_1.g242.t1	1113	945.994	1654	28.5308
scaffold_1.g243.t1	402	236.432	13	0.897228
scaffold_1.g244.t1	654	487.055	1	0.0335033
scaffold_1.g245.t1	402	236.432	2	0.138035
scaffold_1.g246.t1	1941	1773.99	338	3.10907
scaffold_1.g247.t1	1845	1677.99	40	0.388988
scaffold_1.g248.t1	1917	1749.99	117	1.09098
scaffold_1.g249.t1	2001	1833.99	4	0.0355901
scaffold_1.g249.t2	387	221.822	0	0
scaffold_1.g250.t1	1899	1731.99	130	1.2248
scaffold_1.g251.t1	1935	1767.99	104	0.959885
scaffold_1.g252.t1	1866	1698.99	1577	15.1463
scaffold_1.g253.t1	594	427.089	757	28.9231
scaffold_1.g254.t1	753	586.028	1186	33.0242
scaffold_1.g255.t1	777	610.028	1642.32	43.9315
scaffold_1.g256.t1	696	529.043	4089.68	126.143
scaffold_1.g257.t1	834	667.028	468	11.449
scaffold_1.g258.t1	5454	5286.99	6943	21.4292
scaffold_1.g259.t1	450	283.642	634	36.4742
scaffold_1.g260.t1	354	189.842	7877	677.074
scaffold_1.g261.t1	360	195.575	11154	930.644
scaffold_1.g262.t1	378	213.045	394	30.178
scaffold_1.g263.t1	1368	1200.99	2143	29.1171
scaffold_1.g264.t1	1170	1002.99	569	9.25722
scaffold_1.g265.t1	3171	3003.99	7059.41	38.3474
scaffold_1.g265.t2	3321	3153.99	5641.67	29.1886
scaffold_1.g265.t3	3318	3150.99	1597.92	8.27512
scaffold_1.g266.t1	2541	2373.99	8285	56.9481
scaffold_1.g267.t1	1335	1167.99	714	9.97526
scaffold_1.g268.t1	756	589.028	4229	117.157
scaffold_1.g269.t1	1464	1296.99	9973	125.474
scaffold_1.g270.t1	255	98.8288	41	6.76966
scaffold_1.g271.t1	294	133.334	53	6.48636
scaffold_1.g272.t1	1719	1551.99	2394	25.171
scaffold_1.g273.t1	297	136.091	2	0.23981
scaffold_1.g274.t1	2163	1995.99	1876	15.337
scaffold_1.g275.t1	1026	858.994	726	13.7916
scaffold_1.g276.t1	732	565.043	1845	53.2822
scaffold_1.g277.t1	2205	2037.99	845	6.76582
scaffold_1.g278.t1	1422	1254.99	656	8.5296
scaffold_1.g279.t1	705	538.043	229.462	6.95922
scaffold_1.g279.t2	696	529.043	494.538	15.2537
scaffold_1.g280.t1	1392	1224.99	115	1.5319
scaffold_1.g281.t1	1281	1113.99	1178	17.2556
scaffold_1.g282.t1	813	646.028	354	8.94166
scaffold_1.g283.t1	1650	1482.99	2755	30.3144
scaffold_1.g284.t1	2082	1914.99	2084	17.7581
scaffold_1.g285.t1	651	484.055	3649.49	123.028
scaffold_1.g285.t2	648	481.055	1984.51	67.3169
scaffold_1.g286.t1	453	286.627	271	15.4283
scaffold_1.g287.t1	429	262.964	853	52.9322
scaffold_1.g288.t1	270	111.948	374	54.5155
scaffold_1.g289.t1	1470	1302.99	652.272	8.1687
scaffold_1.g289.t2	1473	1305.99	4153.73	51.8995
scaffold_1.g290.t1	447	280.691	0	0
scaffold_1.g291.t1	675	508.055	144.474	4.64028
scaffold_1.g291.t2	648	481.055	91.5262	3.10468
scaffold_1.g292.t1	222	71.5767	156	35.5647
scaffold_1.g293.t1	645	478.055	184.051	6.28241
scaffold_1.g293.t2	684	517.043	28.949	0.913639
scaffold_1.g294.t1	444	277.74	68	3.99519
scaffold_1.g295.t1	642	475.055	190	6.52643
scaffold_1.g296.t1	561	394.12	387	16.0232
scaffold_1.g297.t1	303	141.607	32	3.6875
scaffold_1.g298.t1	276	117.15	51	7.10383
scaffold_1.g299.t1	807	640.028	422	10.7592
scaffold_1.g300.t1	336	172.6	161	15.2213
scaffold_1.g301.t1	333	169.756	69	6.63271
scaffold_1.g302.t1	624	457.067	200	7.14031
scaffold_1.g303.t1	396	230.561	103	7.28984
scaffold_1.g304.t1	672	505.055	330	10.6621
scaffold_1.g305.t1	339	175.468	218	20.2733
scaffold_1.g306.t1	363	198.491	80	6.57683
scaffold_1.g307.t1	324	161.234	118	11.9424
scaffold_1.g308.t1	228	76.38	60	12.8185
scaffold_1.g309.t1	1122	954.994	276.357	4.72212
scaffold_1.g309.t2	1242	1074.99	717.643	10.8935
scaffold_1.g310.t1	2643	2475.99	692	4.56061
scaffold_1.g311.t1	1170	1002.99	238	3.87209
scaffold_1.g311.t2	1140	972.994	0	0
scaffold_1.g312.t1	237	83.6239	38	7.41515
scaffold_1.g313.t1	636	469.055	239	8.31458
scaffold_1.g314.t1	1170	1002.99	51.0666	0.830816
scaffold_1.g315.t1	318	155.564	76.0419	7.97644
scaffold_1.g315.t2	372	207.241	54.9581	4.32736
scaffold_1.g316.t1	306	144.329	254	28.7176
scaffold_1.g317.t1	264	106.634	99.5218	15.2296
scaffold_1.g317.t2	237	83.6239	2.07988	0.405858
scaffold_1.g317.t3	417	251.164	162.398	10.5509
scaffold_1.g318.t1	432	265.937	274	16.8127
scaffold_1.g319.t1	687	520.043	840	26.3577
scaffold_1.g320.t1	318	155.564	272	28.5315
scaffold_1.g321.t1	210	62.3533	3000	785.106
scaffold_1.g322.t1	399	233.468	20	1.39788
scaffold_1.g323.t1	273	114.52	1	0.14249
scaffold_1.g324.t1	465	298.532	1791	97.8973
scaffold_1.g325.t1	549	382.14	1066	45.52
scaffold_1.g326.t1	1047	879.994	17790.8	329.9
scaffold_1.g326.t2	1062	894.994	10508.2	191.591
scaffold_1.g327.t1	507	340.301	364	17.4544
scaffold_1.g328.t1	2190	2022.99	6103	49.2284
scaffold_1.g329.t1	417	251.164	708	45.9984
scaffold_1.g330.t1	1680	1512.99	2349.08	25.3354
scaffold_1.g330.t2	1764	1596.99	1184.92	12.1075
scaffold_1.g331.t1	3555	3387.99	654	3.14994
scaffold_1.g332.t1	4230	4062.99	2064	8.28953
scaffold_1.g333.t1	2307	2139.99	4938	37.6535
scaffold_1.g334.t1	1797	1629.99	1749	17.5094
scaffold_1.g335.t1	942	774.994	4487	94.4766
scaffold_1.g336.t1	459	292.577	18543	1034.21
scaffold_1.g337.t1	2010	1842.99	3816	33.7871
scaffold_1.g338.t1	2352	2184.99	2245	16.7661
scaffold_1.g339.t1	1548	1380.99	73	0.862577
scaffold_1.g340.t1	5886	5718.99	5772	16.4692
scaffold_1.g341.t1	570	403.12	1040	42.0984
scaffold_1.g342.t1	879	711.994	2	0.0458374
scaffold_1.g343.t1	2715	2547.99	1359.77	8.70832
scaffold_1.g343.t2	2691	2523.99	4818.23	31.1505
scaffold_1.g344.t1	873	705.994	5963	137.826
scaffold_1.g345.t1	4548	4380.99	24205	90.1569
scaffold_1.g346.t1	294	133.334	579	70.8604
scaffold_1.g347.t1	912	744.994	1477	32.3515
scaffold_1.g348.t1	1797	1629.99	109.626	1.09747
scaffold_1.g348.t2	1857	1689.99	813.374	7.85366
scaffold_1.g349.t1	1881	1713.99	2792	26.5811
scaffold_1.g350.t1	1767	1599.99	13564	138.336
scaffold_1.g351.t1	759	592.028	2233	61.5478
scaffold_1.g352.t1	1047	879.994	5568	103.249
scaffold_1.g353.t1	1290	1122.99	532	7.73038
scaffold_1.g354.t1	912	744.994	1594	34.9142
scaffold_1.g355.t1	294	133.334	74	9.05642
scaffold_1.g356.t1	1242	1074.99	455	6.90672
scaffold_1.g357.t1	366	201.4	0	0
scaffold_1.g358.t1	213	64.5638	0	0
scaffold_1.g359.t1	1341	1173.99	508.151	7.06307
scaffold_1.g359.t2	1296	1128.99	365.849	5.28782
scaffold_1.g360.t1	819	652.028	755.024	18.8956
scaffold_1.g360.t2	834	667.028	913.976	22.3593
scaffold_1.g361.t1	702	535.043	802	24.4598
scaffold_1.g362.t1	384	218.888	2243	167.214
scaffold_1.g363.t1	1443	1275.99	5282	67.5486
scaffold_1.g364.t1	258	101.441	0	0
scaffold_2.g365.t1	539	372.168	902.995	39.5925
scaffold_2.g366.t1	264	106.634	895	136.96
scaffold_2.g367.t1	423	257.075	2793	177.288
scaffold_2.g368.t1	330	166.901	841	82.225
scaffold_2.g369.t1	255	98.8288	396	65.385
scaffold_2.g370.t1	936	768.994	1243	26.3764
scaffold_2.g371.t1	1866	1698.99	2741	26.3259
scaffold_2.g372.t1	2049	1881.99	2984	25.873
scaffold_2.g373.t1	1194	1026.99	5702	90.5995
scaffold_2.g374.t1	1686	1518.99	1143	12.2788
scaffold_2.g375.t1	1182	1014.99	8126	130.641
scaffold_2.g376.t1	675	508.055	696	22.3545
scaffold_2.g377.t1	348	184.082	1050	93.0774
scaffold_2.g378.t1	2967	2799.99	1111.73	6.47904
scaffold_2.g378.t2	2892	2724.99	628.265	3.76222
scaffold_2.g379.t1	3960	3792.99	3272	14.0766
scaffold_2.g380.t1	288	127.881	0	0
scaffold_2.g381.t1	276	117.15	2	0.278582
scaffold_2.g382.t1	1470	1302.99	14.9129	0.186761
scaffold_2.g383.t1	450	283.642	12210.5	702.473
scaffold_2.g384.t1	213	64.5638	68	17.1865
scaffold_2.g385.t1	1371	1203.99	803	10.8832
scaffold_2.g386.t1	399	233.468	149	10.4142
scaffold_2.g387.t1	1116	948.994	0	0
scaffold_2.g388.t1	261	104.022	0	0
scaffold_2.g389.t1	291	130.593	4	0.499812
scaffold_2.g390.t1	411	245.263	0	0
scaffold_2.g391.t1	1794	1626.99	5	0.0501477
scaffold_2.g392.t1	357	192.683	0	0
scaffold_2.g393.t1	504	337.335	0	0
scaffold_2.g394.t1	3882	3714.99	5459	23.9785
scaffold_2.g395.t1	1683	1515.99	1842	19.8271
scaffold_2.g396.t1	246	91.1684	47	8.41241
scaffold_2.g397.t1	1653	1485.99	1967.23	21.6025
scaffold_2.g397.t2	1641	1473.99	5518.77	61.0961
scaffold_2.g398.t1	1089	921.994	73.7156	1.30466
scaffold_2.g398.t2	1116	948.994	8.28439	0.14245
scaffold_2.g399.t1	1056	888.994	153.937	2.8256
scaffold_2.g400.t1	666	499.055	2	0.0653955
scaffold_2.g401.t1	759	592.028	2	0.0551257
scaffold_2.g402.t1	801	634.028	7	0.180159
scaffold_2.g403.t1	1080	912.994	348.063	6.22095
scaffold_2.g404.t1	675	508.055	1415	45.4477
scaffold_2.g405.t1	273	114.52	0	0
scaffold_2.g406.t1	252	96.2557	38	6.44205
scaffold_2.g407.t1	738	571.028	2591	74.0417
scaffold_2.g408.t1	1299	1131.99	192.681	2.77754
scaffold_2.g408.t2	1341	1173.99	1666.32	23.1611
scaffold_2.g409.t1	240	86.1239	703	133.198
scaffold_2.g410.t1	1866	1698.99	518	4.97513
scaffold_2.g411.t1	759	592.028	1206	33.2408
scaffold_2.g412.t1	8265	8097.99	4135	8.3323
scaffold_2.g413.t1	888	720.994	565	12.7874
scaffold_2.g414.t1	2073	1905.99	363	3.10779
scaffold_2.g415.t1	1557	1389.99	10682	125.403
scaffold_2.g416.t1	663	496.055	2998	98.6207
scaffold_2.g417.t1	399	233.468	57	3.98395
scaffold_2.g418.t1	2220	2052.99	655	5.20619
scaffold_2.g419.t1	708	541.043	1	0.0301603
scaffold_2.g420.t1	375	210.131	0	0
scaffold_2.g421.t1	240	86.1239	1	0.189471
scaffold_2.g422.t1	3543	3375.99	9805	47.3928
scaffold_2.g423.t1	711	544.043	287	8.60826
scaffold_2.g424.t1	978	810.994	1084	21.8111
scaffold_2.g425.t1	1395	1227.99	1682	22.351
scaffold_2.g426.t1	849	682.028	166	3.97166
scaffold_2.g427.t1	2772	2604.99	13902	87.0838
scaffold_2.g428.t1	360	195.575	2159	180.138
scaffold_2.g429.t1	387	221.822	7831	576.075
scaffold_2.g430.t1	336	172.6	34	3.21443
scaffold_2.g431.t1	1008	840.994	6519	126.49
scaffold_2.g432.t1	549	382.14	1346	57.4764
scaffold_2.g433.t1	231	78.7832	1	0.207125
scaffold_2.g434.t1	2208	2040.99	2078	16.6139
scaffold_2.g435.t1	279	119.814	18	2.4515
scaffold_2.g436.t1	351	186.941	2	0.174579
scaffold_2.g437.t1	2433	2265.99	1044.68	7.52299
scaffold_2.g437.t2	2466	2298.99	2380.32	16.8952
scaffold_2.g438.t1	2625	2457.99	302.805	2.01024
scaffold_2.g438.t2	2535	2367.99	410.195	2.82668
scaffold_2.g439.t1	453	286.627	4	0.227724
scaffold_2.g440.t1	561	394.12	6	0.248422
scaffold_2.g441.t1	3714	3546.99	1675	7.70586
scaffold_2.g442.t1	3330	3162.99	7380	38.0737
scaffold_2.g443.t1	600	433.078	1621	61.0778
scaffold_2.g444.t1	444	277.74	16230	953.557
scaffold_2.g445.t1	651	484.055	63411	2137.65
scaffold_2.g446.t1	1056	888.994	7495	137.575
scaffold_2.g447.t1	327	164.044	21467	2135.4
scaffold_2.g448.t1	2637	2469.99	950	6.27616
scaffold_2.g448.t2	2631	2463.99	4704	31.1526
scaffold_2.g449.t1	1221	1053.99	5	0.0774103
scaffold_2.g450.t1	846	679.028	11	0.264345
scaffold_2.g451.t1	930	762.994	0	0
scaffold_2.g451.t2	1071	903.994	15	0.270765
scaffold_2.g452.t1	930	762.994	1	0.0213868
scaffold_2.g453.t1	972	804.994	5	0.101355
scaffold_2.g454.t1	726	559.043	0	0
scaffold_2.g454.t2	486	319.417	2	0.102174
scaffold_2.g455.t1	1467	1299.99	6	0.0753141
scaffold_2.g456.t1	396	230.561	0.611423	0.0432735
scaffold_2.g456.t2	4551	4383.99	7.38858	0.0275016
scaffold_2.g457.t1	3807	3639.99	315	1.41214
scaffold_2.g458.t1	1233	1065.99	3752	57.4347
scaffold_2.g459.t1	591	424.1	2605	100.232
scaffold_2.g460.t1	3675	3507.99	3806	17.7042
scaffold_2.g461.t1	285	125.133	1286	167.701
scaffold_2.g462.t1	957	789.994	13791	284.865
scaffold_2.g463.t1	318	155.564	1	0.104895
scaffold_2.g464.t1	891	723.994	9047.11	203.911
scaffold_2.g464.t2	852	685.028	15422.9	367.387
scaffold_2.g465.t1	867	699.994	21	0.489544
scaffold_2.g466.t1	2202	2034.99	410	3.28766
scaffold_2.g467.t1	1059	891.994	7	0.128057
scaffold_2.g468.t1	3936	3768.99	1141	4.94
scaffold_2.g469.t1	528	361.214	2	0.0903508
scaffold_2.g470.t1	711	544.043	936	28.0743
scaffold_2.g471.t1	219	69.2679	256	60.3079
scaffold_2.g472.t1	642	475.055	3490	119.88
scaffold_2.g473.t1	996	828.994	954	18.7786
scaffold_2.g474.t1	2118	1950.99	1139.28	9.52883
scaffold_2.g475.t1	4866	4698.99	5667	19.6795
scaffold_2.g476.t1	2847	2679.99	10423.1	63.4642
scaffold_2.g476.t2	2829	2661.99	1397.9	8.56911
scaffold_2.g477.t1	207	60.1663	406	110.113
scaffold_2.g478.t1	405	239.379	265	18.0645
scaffold_2.g479.t1	1284	1116.99	7585	110.808
scaffold_2.g480.t1	1173	1005.99	9177	148.858
scaffold_2.g481.t1	699	532.043	1175	36.0378
scaffold_2.g482.t1	837	670.028	43	1.04723
scaffold_2.g483.t1	1233	1065.99	199	3.04625
scaffold_2.g484.t1	543	376.149	0	0
scaffold_2.g485.t1	291	130.593	7	0.874672
scaffold_2.g486.t1	474	307.479	1	0.0530702
scaffold_2.g487.t1	1473	1305.99	3055	38.1713
scaffold_2.g488.t1	1347	1179.99	1225	16.9404
scaffold_2.g489.t1	1782	1614.99	13336	134.748
scaffold_2.g490.t1	321	158.413	605	62.3207
scaffold_2.g491.t1	1326	1158.99	3078	43.3365
scaffold_2.g492.t1	852	685.028	2305	54.9072
scaffold_2.g493.t1	2919	2751.99	2123	12.5884
scaffold_2.g494.t1	2256	2088.99	3686	28.7929
scaffold_2.g495.t1	924	756.994	3149	67.8808
scaffold_2.g496.t1	4557	4389.99	3814	14.177
scaffold_2.g497.t1	4659	4491.99	1750	6.35719
scaffold_2.g498.t1	471	304.487	2	0.107183
scaffold_2.g499.t1	366	201.4	904	73.2446
scaffold_2.g500.t1	2139	1971.99	9002	74.4904
scaffold_2.g501.t1	372	207.241	573	45.1176
scaffold_2.g502.t1	1260	1092.99	33818	504.89
scaffold_2.g503.t1	414	248.207	9	0.59169
scaffold_2.g504.t1	1068	900.994	841	15.2314
scaffold_2.g505.t1	453	286.627	17231	980.978
scaffold_2.g506.t1	3375	3207.99	3501	17.8084
scaffold_2.g507.t1	426	260.023	332	20.835
scaffold_2.g508.t1	7590	7422.99	5494	12.0775
scaffold_2.g509.t1	588	421.11	1100	42.6249
scaffold_2.g510.t1	1161	993.994	994	16.3181
scaffold_2.g511.t1	426	260.023	51692	3243.98
scaffold_2.g512.t1	3540	3372.99	2510	12.143
scaffold_2.g513.t1	1404	1236.99	1988	26.225
scaffold_2.g514.t1	1875	1707.99	733.052	7.0035
scaffold_2.g514.t2	1872	1704.99	889.948	8.51743
scaffold_2.g515.t1	2724	2556.99	3634	23.1911
scaffold_2.g516.t1	2196	2028.99	2185	17.5727
scaffold_2.g517.t1	1506	1338.99	1741	21.2171
scaffold_2.g518.t1	270	111.948	0	0
scaffold_2.g519.t1	3153	2985.99	2183	11.9298
scaffold_2.g520.t1	2604	2436.99	2566	17.1818
scaffold_2.g521.t1	2088	1920.99	19447	165.194
scaffold_2.g522.t1	630	463.055	1800	63.4317
scaffold_2.g523.t1	633	466.055	1	0.035013
scaffold_2.g524.t1	465	298.532	103	5.63005
scaffold_2.g525.t1	396	230.561	337	23.8512
scaffold_2.g526.t1	687	520.043	96	3.0123
scaffold_2.g527.t1	795	628.028	1325.86	34.4496
scaffold_2.g527.t2	807	640.028	2251.14	57.3945
scaffold_2.g528.t1	1698	1530.99	1702	18.1406
scaffold_2.g529.t1	1848	1680.99	2747	26.6661
scaffold_2.g530.t1	732	565.043	3094.93	89.3792
scaffold_2.g530.t2	1500	1332.99	2286.38	27.9889
scaffold_2.g531.t1	2394	2226.99	3475.8	25.4684
scaffold_2.g531.t2	2388	2220.99	2003.2	14.7178
scaffold_2.g532.t1	354	189.842	2	0.171912
scaffold_2.g533.t1	273	114.52	1	0.14249
scaffold_2.g534.t1	348	184.082	7	0.620516
scaffold_2.g535.t1	3153	2985.99	1924	10.5144
scaffold_2.g536.t1	1791	1623.99	3894.7	39.1342
scaffold_2.g537.t1	405	239.379	4	0.272672
scaffold_2.g538.t1	1770	1602.99	77	0.783836
scaffold_2.g539.t1	357	192.683	6.09986	0.516587
scaffold_2.g539.t2	312	149.926	190.9	20.7776
scaffold_2.g540.t1	1284	1116.99	27626	403.584
scaffold_2.g541.t1	789	622.028	490	12.8544
scaffold_2.g542.t1	306	144.329	10689	1208.51
scaffold_2.g543.t1	1299	1131.99	7152	103.098
scaffold_2.g544.t1	1926	1758.99	4938	45.8093
scaffold_2.g545.t1	621	454.067	2118	76.1154
scaffold_2.g546.t1	7140	6972.99	15273	35.7414
scaffold_2.g547.t1	2031	1863.99	1193	10.4439
scaffold_2.g548.t1	810	643.028	4	0.101507
scaffold_2.g549.t1	2013	1845.99	397	3.50935
scaffold_2.g550.t1	1467	1299.99	691	8.67368
scaffold_2.g551.t1	771	604.028	1390	37.5512
scaffold_2.g552.t1	6315	6147.99	5520	14.6512
scaffold_2.g553.t1	231	78.7832	0	0
scaffold_2.g554.t1	285	125.133	0	0
scaffold_2.g555.t1	1560	1392.99	354	4.14687
scaffold_2.g556.t1	429	262.964	2	0.124108
scaffold_2.g557.t1	363	198.491	0	0
scaffold_2.g558.t1	603	436.078	6	0.224519
scaffold_2.g559.t1	258	101.441	1	0.160862
scaffold_2.g560.t1	516	349.267	39.8907	1.86372
scaffold_2.g561.t1	1245	1077.99	15.1093	0.228715
scaffold_2.g562.t1	1035	867.994	18	0.338394
scaffold_2.g563.t1	252	96.2557	2538	430.261
scaffold_2.g564.t1	1485	1317.99	1612	19.9581
scaffold_2.g565.t1	420	254.119	145	9.31101
scaffold_2.g566.t1	258	101.441	1	0.160862
scaffold_2.g567.t1	723	556.043	15.2028	0.446152
scaffold_2.g567.t2	540	373.168	8.79718	0.384686
scaffold_2.g568.t1	738	571.028	24.7128	0.706206
scaffold_2.g568.t2	723	556.043	450.287	13.2144
scaffold_2.g569.t1	249	93.6778	692	120.541
scaffold_2.g570.t1	5832	5664.99	4442	12.7952
scaffold_2.g571.t1	675	508.055	322	10.3422
scaffold_2.g572.t1	1653	1485.99	3155	34.6457
scaffold_2.g573.t1	2238	2070.99	1695.53	13.3596
scaffold_2.g573.t2	2154	1986.99	405.474	3.32991
scaffold_2.g574.t1	246	91.1684	18	3.22177
scaffold_2.g575.t1	1068	900.994	293	5.30655
scaffold_2.g576.t1	300	138.823	2.86882	0.337217
scaffold_2.g577.t1	2415	2247.99	894	6.48947
scaffold_2.g578.t1	3615	3447.99	1983.96	9.38929
scaffold_2.g578.t2	3435	3267.99	2816.04	14.0613
scaffold_2.g579.t1	969	801.994	2730	55.5467
scaffold_2.g580.t1	1881	1713.99	1233	11.7387
scaffold_2.g581.t1	1239	1071.99	393	5.98228
scaffold_2.g582.t1	6018	5850.99	7066	19.7066
scaffold_2.g583.t1	363	198.491	629	51.7103
scaffold_2.g584.t1	282	122.458	605	80.6187
scaffold_2.g585.t1	789	622.028	703	18.4422
scaffold_2.g586.t1	1428	1260.99	1090	14.1052
scaffold_2.g587.t1	627	460.055	154	5.46232
scaffold_2.g588.t1	2604	2436.99	2123	14.2155
scaffold_2.g589.t1	2967	2799.99	10165	59.2403
scaffold_2.g590.t1	903	735.994	2475	54.8741
scaffold_2.g591.t1	2424	2256.99	11383.8	82.3046
scaffold_2.g591.t2	2319	2151.99	1233.1	9.35025
scaffold_2.g591.t3	2610	2442.99	3152.09	21.0544
scaffold_2.g592.t1	840	673.028	6001	145.498
scaffold_2.g593.t1	834	667.028	88	2.15281
scaffold_2.g594.t1	594	427.089	1660	63.4244
scaffold_2.g595.t1	879	711.994	2985	68.4124
scaffold_2.g596.t1	1689	1521.99	957	10.2604
scaffold_2.g597.t1	1206	1038.99	774	12.1561
scaffold_2.g598.t1	234	81.1858	2	0.401991
scaffold_2.g599.t1	1215	1047.99	13	0.202419
scaffold_2.g600.t1	2925	2757.99	3909	23.128
scaffold_2.g601.t1	1227	1059.99	678	10.4374
scaffold_2.g602.t1	1011	843.994	1706	32.9842
scaffold_2.g603.t1	1371	1203.99	5818	78.8526
scaffold_2.g604.t1	3090	2922.99	3609	20.1477
scaffold_2.g605.t1	4119	3951.99	783.786	3.23629
scaffold_2.g605.t2	5775	5607.99	8356.73	24.3162
scaffold_2.g605.t3	5730	5562.99	4571.88	13.4108
scaffold_2.g605.t4	5583	5415.99	10266.6	30.9325
scaffold_2.g606.t1	759	592.028	7	0.19294
scaffold_2.g607.t1	3918	3750.99	1524	6.62987
scaffold_2.g608.t1	3687	3519.99	59	0.273512
scaffold_2.g609.t1	5508	5340.99	3651	11.1547
scaffold_2.g610.t1	288	127.881	29	3.7005
scaffold_2.g611.t1	1692	1524.99	61	0.652722
scaffold_2.g612.t1	1380	1212.99	1640	22.0624
scaffold_2.g613.t1	939	771.994	4425	93.5333
scaffold_2.g614.t1	2283	2115.99	3338	25.7418
scaffold_2.g615.t1	1032	864.994	24	0.452757
scaffold_2.g616.t1	717	550.043	26	0.771336
scaffold_2.g617.t1	2796	2628.99	9431	58.5376
scaffold_2.g618.t1	2895	2727.99	48498	290.1
scaffold_2.g619.t1	882	714.994	1310	29.8975
scaffold_2.g620.t1	1935	1767.99	2056	18.9762
scaffold_2.g621.t1	1914	1746.99	542.273	5.06516
scaffold_2.g622.t1	1038	870.994	4322	80.9723
scaffold_2.g623.t1	672	505.055	63	2.03549
scaffold_2.g624.t1	3594	3426.99	1485.79	7.07476
scaffold_2.g624.t2	3597	3429.99	6429.21	30.5866
scaffold_2.g625.t1	228	76.38	30	6.40926
scaffold_2.g626.t1	540	373.168	113	4.9413
scaffold_2.g627.t1	768	601.028	2015	54.7075
scaffold_2.g628.t1	321	158.413	67	6.90163
scaffold_2.g629.t1	1761	1593.99	208	2.12933
scaffold_2.g630.t1	423	257.075	65.1537	4.13568
scaffold_2.g631.t1	753	586.028	12	0.334141
scaffold_2.g632.t1	1044	876.994	4445	82.7069
scaffold_2.g633.t1	669	502.055	355	11.5383
scaffold_2.g634.t1	2682	2514.99	228	1.47933
scaffold_2.g635.t1	876	708.994	1186	27.2966
scaffold_2.g636.t1	387	221.822	13747	1011.28
scaffold_2.g637.t1	1518	1350.99	622	7.51283
scaffold_2.g638.t1	1419	1251.99	2311	30.1207
scaffold_2.g639.t1	4143	3975.99	9791	40.1835
scaffold_2.g640.t1	348	184.082	4	0.354581
scaffold_2.g641.t1	582	415.11	1	0.03931
scaffold_2.g642.t1	363	198.491	0	0
scaffold_2.g643.t1	3360	3192.99	3401	17.381
scaffold_2.g644.t1	396	230.561	1	0.0707751
scaffold_2.g645.t1	366	201.4	0	0
scaffold_2.g646.t1	1569	1401.99	677.465	7.88511
scaffold_2.g646.t2	1554	1386.99	3112.53	36.619
scaffold_2.g647.t1	627	460.055	6500	230.552
scaffold_2.g648.t1	1239	1071.99	1656	25.2078
scaffold_2.g649.t1	1533	1365.99	1002	11.9698
scaffold_2.g650.t1	1158	990.994	1882.72	31.0015
scaffold_2.g650.t2	1155	987.994	3354.2	55.3989
scaffold_2.g650.t3	1155	987.994	4818.08	79.5767
scaffold_2.g651.t1	1140	972.994	163	2.73366
scaffold_2.g652.t1	1149	981.994	3487	57.9442
scaffold_2.g653.t1	1554	1386.99	198	2.32947
scaffold_2.g654.t1	657	490.055	3703	123.303
scaffold_2.g655.t1	255	98.8288	606	100.059
scaffold_2.g656.t1	1023	855.994	210	4.00327
scaffold_2.g657.t1	2643	2475.99	825	5.43715
scaffold_2.g658.t1	1887	1719.99	2340	22.2001
scaffold_2.g659.t1	1176	1008.99	1573	25.4394
scaffold_2.g660.t1	450	283.642	97	5.58044
scaffold_2.g661.t1	3126	2958.99	1087.85	5.99918
scaffold_2.g661.t2	3099	2931.99	1188.15	6.61263
scaffold_2.g662.t1	2973	2805.99	1718	9.99086
scaffold_2.g663.t1	2607	2439.99	5826.78	38.9679
scaffold_2.g663.t2	2625	2457.99	1891.22	12.5553
scaffold_2.g664.t1	1545	1377.99	48	0.568408
scaffold_2.g665.t1	2547	2379.99	3372	23.1195
scaffold_2.g666.t1	300	138.823	16	1.88073
scaffold_2.g667.t1	2688	2520.99	3429	22.1954
scaffold_2.g668.t1	1602	1434.99	6948	79.009
scaffold_2.g669.t1	2076	1908.99	771	6.59047
scaffold_2.g670.t1	1269	1101.99	270	3.99808
scaffold_2.g671.t1	2592	2424.99	1937	13.0342
scaffold_2.g672.t1	654	487.055	4156	139.24
scaffold_2.g673.t1	1122	954.994	232	3.96419
scaffold_2.g674.t1	768	601.028	247	6.70608
scaffold_2.g675.t1	963	795.994	746	15.2931
scaffold_2.g676.t1	906	738.994	1084	23.9362
scaffold_2.g677.t1	1701	1533.99	2088	22.2113
scaffold_2.g678.t1	4314	4146.99	1925	7.57467
scaffold_2.g679.t1	10161	9993.99	1001.31	1.63493
scaffold_2.g679.t2	10158	9990.99	9650.07	15.7612
scaffold_2.g679.t3	10107	9939.99	10172.6	16.6999
scaffold_2.g680.t1	945	777.994	2024	42.4523
scaffold_2.g681.t1	1749	1581.99	4460	46.0041
scaffold_2.g682.t1	1926	1758.99	743.742	6.89961
scaffold_2.g682.t2	1866	1698.99	2489.26	23.9081
scaffold_2.g683.t1	717	550.043	53	1.57234
scaffold_2.g684.t1	2598	2430.99	45.6247	0.306255
scaffold_2.g685.t1	1200	1032.99	2197	34.7055
scaffold_2.g686.t1	444	277.74	1	0.0587527
scaffold_2.g687.t1	750	583.028	1488	41.6466
scaffold_2.g688.t1	324	161.234	0	0
scaffold_2.g689.t1	288	127.881	571	72.8615
scaffold_2.g690.t1	375	210.131	303	23.5299
scaffold_2.g691.t1	2037	1869.99	1209	10.55
scaffold_2.g692.t1	1011	843.994	692	13.3793
scaffold_2.g693.t1	1650	1482.99	149.033	1.63987
scaffold_2.g693.t2	1623	1455.99	191.967	2.15146
scaffold_2.g694.t1	1689	1521.99	928	9.94951
scaffold_2.g695.t1	465	298.532	0	0
scaffold_2.g696.t1	1389	1221.99	250	3.33839
scaffold_2.g697.t1	660	493.055	19	0.628817
scaffold_2.g698.t1	432	265.937	4	0.245441
scaffold_2.g699.t1	1347	1179.99	884.402	12.2303
scaffold_2.g699.t2	1497	1329.99	274.598	3.3691
scaffold_2.g700.t1	822	655.028	302	7.52339
scaffold_2.g701.t1	291	130.593	48	5.99775
scaffold_2.g702.t1	1431	1263.99	765	9.87605
scaffold_2.g703.t1	1596	1428.99	531	6.0636
scaffold_2.g704.t1	1287	1119.99	2497.24	36.3841
scaffold_2.g704.t2	3477	3309.99	3022.62	14.9013
scaffold_2.g704.t3	2061	1893.99	173.133	1.49166
scaffold_2.g705.t1	2217	2049.99	1299	10.3401
scaffold_2.g706.t1	3321	3153.99	2665.42	13.7902
scaffold_2.g707.t1	720	553.043	5	0.147529
scaffold_2.g708.t1	444	277.74	24	1.41007
scaffold_2.g709.t1	240	86.1239	3	0.568414
scaffold_2.g710.t1	2691	2523.99	302.288	1.95433
scaffold_2.g711.t1	474	307.479	63.6741	3.3792
scaffold_2.g712.t1	459	292.577	133.16	7.42681
scaffold_2.g713.t1	3465	3297.99	38	0.188018
scaffold_2.g714.t1	423	257.075	17.4259	1.10612
scaffold_2.g715.t1	1506	1338.99	6.1604	0.0750752
scaffold_2.g716.t1	774	607.028	2	0.0537635
scaffold_2.g717.t1	1557	1389.99	6	0.0704377
scaffold_2.g718.t1	1524	1356.99	8	0.0962008
scaffold_2.g719.t1	527	360.214	83.4332	3.77959
scaffold_3.g720.t1	255	98.8288	116	19.1532
scaffold_3.g721.t1	864	696.994	1089	25.4956
scaffold_3.g722.t1	840	673.028	539.171	13.0725
scaffold_3.g722.t2	315	152.718	147.829	15.7956
scaffold_3.g723.t1	345	181.188	697	62.7725
scaffold_3.g724.t1	1248	1080.99	466.937	7.04859
scaffold_3.g724.t2	1233	1065.99	680.063	10.4102
scaffold_3.g725.t1	351	186.941	1	0.0872893
scaffold_3.g726.t1	921	753.994	46662	1009.86
scaffold_3.g727.t1	1239	1071.99	3751	57.0981
scaffold_3.g728.t1	1515	1347.99	1791.22	21.6835
scaffold_3.g728.t2	1626	1458.99	343.777	3.84494
scaffold_3.g729.t1	348	184.082	936	82.9719
scaffold_3.g730.t1	927	759.994	858	18.4223
scaffold_3.g731.t1	1311	1143.99	939	13.3939
scaffold_3.g732.t1	1911	1743.99	844.749	7.90404
scaffold_3.g732.t2	2004	1836.99	268.251	2.38287
scaffold_3.g733.t1	1428	1260.99	2072	26.8129
scaffold_3.g734.t1	1380	1212.99	1083	14.5692
scaffold_3.g735.t1	2784	2616.99	4104	25.5901
scaffold_3.g736.t1	2298	2130.99	5430	41.58
scaffold_3.g737.t1	744	577.028	1576	44.5683
scaffold_3.g738.t1	279	119.814	6	0.817167
scaffold_3.g739.t1	276	117.15	47037	6551.82
scaffold_3.g740.t1	1134	966.994	755	12.7406
scaffold_3.g741.t1	1293	1125.99	5086	73.7067
scaffold_3.g742.t1	1845	1677.99	463	4.50254
scaffold_3.g743.t1	1875	1707.99	1100	10.5093
scaffold_3.g744.t1	3732	3564.99	4687	21.4537
scaffold_3.g745.t1	1419	1251.99	8827	115.048
scaffold_3.g746.t1	360	195.575	5243	437.454
scaffold_3.g747.t1	1194	1026.99	3345	53.149
scaffold_3.g748.t1	435	268.884	0	0
scaffold_3.g749.t1	3447	3279.99	1830	9.10426
scaffold_3.g750.t1	1056	888.994	356	6.53458
scaffold_3.g751.t1	2628	2460.99	3669	24.3279
scaffold_3.g752.t1	2244	2076.99	5900	46.3536
scaffold_3.g753.t1	261	104.022	6	0.941221
scaffold_3.g754.t1	4443	4275.99	1441	5.49912
scaffold_3.g755.t1	1536	1368.99	5205	62.042
scaffold_3.g756.t1	324	161.234	1515	153.329
scaffold_3.g757.t1	5583	5415.99	14222.4	42.8511
scaffold_3.g757.t2	5577	5409.99	5966.57	17.9968
scaffold_3.g758.t1	393	227.636	2	0.143369
scaffold_3.g759.t1	1206	1038.99	2514.9	39.498
scaffold_3.g759.t2	1074	906.994	754.097	13.5672
scaffold_3.g760.t1	486	319.417	744	38.0086
scaffold_3.g761.t1	450	283.642	837	48.1528
scaffold_3.g762.t1	771	604.028	1485	40.1177
scaffold_3.g763.t1	2235	2067.99	78	0.615477
scaffold_3.g764.t1	267	109.277	2	0.298653
scaffold_3.g765.t1	1251	1083.99	315	4.74188
scaffold_3.g766.t1	2532	2364.99	3225	22.2519
scaffold_3.g767.t1	2013	1845.99	4963	43.8713
scaffold_3.g768.t1	3600	3432.99	2793	13.2759
scaffold_3.g769.t1	1191	1023.99	711	11.3302
scaffold_3.g770.t1	336	172.6	687	64.9504
scaffold_3.g771.t1	1353	1185.99	453	6.23279
scaffold_3.g772.t1	309	147.154	445	49.3464
scaffold_3.g773.t1	1041	873.994	1299	24.2531
scaffold_3.g774.t1	762	595.028	28.6588	0.785936
scaffold_3.g775.t1	1980	1812.99	5950	53.5534
scaffold_3.g776.t1	4290	4122.99	5087.75	20.1363
scaffold_3.g777.t1	1014	846.994	5	0.0963288
scaffold_3.g778.t1	276	117.15	0	0
scaffold_3.g779.t1	4326	4158.99	1669	6.54839
scaffold_3.g780.t1	201	55.8409	20	5.84446
scaffold_3.g781.t1	741	574.028	1215	34.539
scaffold_3.g782.t1	861	694.011	1905	44.7914
scaffold_3.g783.t1	873	705.994	23	0.53161
scaffold_3.g784.t1	234	81.1858	386	77.5843
scaffold_3.g785.t1	816	649.028	101	2.53936
scaffold_3.g786.t1	345	181.188	2337	210.472
scaffold_3.g787.t1	777	610.028	31	0.829236
scaffold_3.g788.t1	4005	3837.99	1943.98	8.26519
scaffold_3.g788.t2	3927	3759.99	2005.02	8.7016
scaffold_3.g789.t1	255	98.8288	45	7.43012
scaffold_3.g790.t1	5217	5049.99	1090.82	3.52475
scaffold_3.g790.t2	5124	4956.99	432.797	1.42473
scaffold_3.g790.t3	5121	4953.99	1158.79	3.81694
scaffold_3.g790.t4	5022	4854.99	1750.87	5.8848
scaffold_3.g790.t5	4983	4815.99	4179.73	14.1621
scaffold_3.g791.t1	597	430.089	66	2.5041
scaffold_3.g792.t1	1062	894.994	1745	31.8157
scaffold_3.g793.t1	612	445.078	3191	116.992
scaffold_3.g794.t1	267	109.277	3605	538.321
scaffold_3.g795.t1	708	541.043	686	20.6899
scaffold_3.g796.t1	1158	990.994	8	0.13173
scaffold_3.g797.t1	4404	4236.99	2462	9.48193
scaffold_3.g798.t1	480	313.456	317	16.5025
scaffold_3.g799.t1	429	262.964	42	2.60627
scaffold_3.g800.t1	912	744.994	297785	6522.54
scaffold_3.g801.t1	2706	2538.99	54409	349.684
scaffold_3.g802.t1	2811	2643.99	3019	18.6324
scaffold_3.g803.t1	516	349.267	1	0.0467207
scaffold_3.g804.t1	909	741.994	7	0.153945
scaffold_3.g805.t1	411	245.263	10	0.665326
scaffold_3.g806.t1	585	418.11	232.376	9.06915
scaffold_3.g807.t1	564	397.12	270.824	11.1284
scaffold_3.g808.t1	594	427.089	455.562	17.4059
scaffold_3.g809.t1	2031	1863.99	372	3.2566
scaffold_3.g810.t1	1431	1263.99	18	0.232378
scaffold_3.g811.t1	261	104.022	0	0
scaffold_3.g812.t1	690	523.043	0	0
scaffold_3.g813.t1	912	744.994	326	7.14055
scaffold_3.g814.t1	351	186.941	12	1.04747
scaffold_3.g815.t1	279	119.814	6	0.817167
scaffold_3.g816.t1	423	257.075	0	0
scaffold_3.g817.t1	375	210.131	196	15.2207
scaffold_3.g818.t1	3033	2865.99	3344	19.0396
scaffold_3.g819.t1	288	127.881	0	0
scaffold_3.g820.t1	1662	1494.99	7406	80.8371
scaffold_3.g821.t1	411	245.263	27	1.79638
scaffold_3.g822.t1	357	192.683	1697	143.716
scaffold_3.g823.t1	1224	1056.99	4057	62.6324
scaffold_3.g824.t1	1266	1098.99	2725	40.4611
scaffold_3.g825.t1	909	741.994	6964.86	153.172
scaffold_3.g825.t2	891	723.994	2120.43	47.7921
scaffold_3.g825.t3	1167	999.994	772.71	12.6092
scaffold_3.g826.t1	339	175.468	1412	131.312
scaffold_3.g827.t1	1737	1569.99	1783	18.5319
scaffold_3.g828.t1	858	691.011	6294	148.631
scaffold_3.g829.t1	750	583.028	94308	2639.52
scaffold_3.g830.t1	384	218.888	7	0.521846
scaffold_3.g831.t1	1098	930.994	1372	24.0477
scaffold_3.g832.t1	1371	1203.99	2668	36.16
scaffold_3.g833.t1	375	210.131	34	2.64032
scaffold_3.g834.t1	357	192.683	60	5.08131
scaffold_3.g835.t1	3297	3129.99	2408.37	12.5559
scaffold_3.g835.t2	3111	2943.99	7968.49	44.1678
scaffold_3.g835.t3	3207	3039.99	4859.13	26.0827
scaffold_3.g836.t1	579	412.11	28	1.10869
scaffold_3.g837.t1	3135	2967.99	12	0.0659758
scaffold_3.g838.t1	345	181.188	426	38.366
scaffold_3.g839.t1	15429	15262	2255.11	2.41115
scaffold_3.g839.t2	15318	15151	7954.14	8.56681
scaffold_3.g839.t3	15339	15172	9752.7	10.4894
scaffold_3.g840.t1	1008	840.994	2382	46.2185
scaffold_3.g841.t1	639	472.055	3207	110.859
scaffold_3.g842.t1	1254	1086.99	1509	22.6532
scaffold_3.g843.t1	1548	1380.99	6	0.0708967
scaffold_3.g844.t1	2853	2685.99	512.944	3.11624
scaffold_3.g844.t2	2862	2694.99	100.056	0.605832
scaffold_3.g845.t1	2622	2454.99	5087.34	33.8148
scaffold_3.g845.t2	2607	2439.99	1749.65	11.7011
scaffold_3.g846.t1	1416	1248.99	3737	48.8236
scaffold_3.g847.t1	1065	897.994	696	12.6474
scaffold_3.g848.t1	321	158.413	1217	125.362
scaffold_3.g849.t1	594	427.089	14611	558.249
scaffold_3.g850.t1	1674	1506.99	2445	26.4749
scaffold_3.g851.t1	1995	1827.99	2030	18.1212
scaffold_3.g852.t1	2214	2046.99	69495.8	553.998
scaffold_3.g852.t2	2211	2043.99	39780.2	317.581
scaffold_3.g853.t1	759	592.028	5	0.137814
scaffold_3.g854.t1	1080	912.994	1282.89	22.9292
scaffold_3.g855.t1	585	418.11	757.109	29.5484
scaffold_3.g856.t1	636	469.055	1437	49.9918
scaffold_3.g857.t1	618	451.067	1111	40.192
scaffold_3.g858.t1	1599	1431.99	3540	40.3393
scaffold_3.g859.t1	684	517.043	481	15.1805
scaffold_3.g860.t1	5355	5187.99	5578	17.5447
scaffold_3.g861.t1	2277	2109.99	5371	41.5375
scaffold_3.g862.t1	366	201.4	327	26.4944
scaffold_3.g863.t1	3054	2886.99	5622	31.7769
scaffold_3.g864.t1	1071	903.994	1037	18.7189
scaffold_3.g865.t1	2562	2394.99	3840	26.1634
scaffold_3.g866.t1	1989	1821.99	335.729	3.00683
scaffold_3.g866.t2	1854	1686.99	2463.27	23.8268
scaffold_3.g867.t1	2202	2034.99	3115	24.9782
scaffold_3.g868.t1	816	649.028	1921	48.2981
scaffold_3.g869.t1	411	245.263	58918	3919.97
scaffold_3.g870.t1	846	679.028	589	14.1545
scaffold_3.g871.t1	546	379.149	2	0.0860769
scaffold_3.g872.t1	468	301.525	4	0.216473
scaffold_3.g873.t1	774	607.028	1157	31.1023
scaffold_3.g873.t2	783	616.028	1101	29.1643
scaffold_3.g874.t1	915	747.994	1238	27.0078
scaffold_3.g875.t1	2763	2595.99	6116	38.4442
scaffold_3.g876.t1	264	106.634	18	2.7545
scaffold_3.g877.t1	1098	930.994	26.6109	0.466422
scaffold_3.g878.t1	387	221.822	524	38.5472
scaffold_3.g879.t1	516	349.267	32	1.49506
scaffold_3.g880.t1	402	236.432	134	9.24835
scaffold_3.g881.t1	1041	873.994	395	7.37489
scaffold_3.g882.t1	372	207.241	21	1.65352
scaffold_3.g883.t1	342	178.329	32	2.92816
scaffold_3.g884.t1	804	637.028	47	1.20394
scaffold_3.g885.t1	654	487.055	22	0.737074
scaffold_3.g886.t1	372	207.241	253	19.921
scaffold_3.g887.t1	567	400.12	6	0.244696
scaffold_3.g888.t1	1107	939.994	36	0.624948
scaffold_3.g889.t1	399	233.468	0	0
scaffold_3.g890.t1	210	62.3533	36	9.42127
scaffold_3.g891.t1	1773	1605.99	10017.3	101.783
scaffold_3.g892.t1	1683	1515.99	111	1.19479
scaffold_3.g893.t1	1698	1530.99	1602.68	17.0821
scaffold_3.g894.t1	1503	1335.99	1633	19.9457
scaffold_3.g895.t1	405	239.379	4079	278.058
scaffold_3.g896.t1	1140	972.994	1245.17	20.8827
scaffold_3.g896.t2	1131	963.994	2119.83	35.8833
scaffold_3.g897.t1	243	88.626	54	9.94258
scaffold_3.g898.t1	1422	1254.99	2642	34.3525
scaffold_3.g899.t1	348	184.082	2122	188.105
scaffold_3.g900.t1	450	283.642	760.615	43.7584
scaffold_3.g900.t2	669	502.055	1211.39	39.3729
scaffold_3.g901.t1	1806	1638.99	3316	33.0144
scaffold_3.g902.t1	237	83.6239	60	11.7081
scaffold_3.g903.t1	2634	2466.99	5632	37.253
scaffold_3.g904.t1	1272	1104.99	2393	35.3386
scaffold_3.g905.t1	213	64.5638	2	0.505484
scaffold_3.g906.t1	2199	2031.99	984	7.90204
scaffold_3.g907.t1	2805	2637.99	1022	6.32184
scaffold_3.g908.t1	312	149.926	9	0.979563
scaffold_3.g909.t1	213	64.5638	2	0.505484
scaffold_3.g910.t1	1914	1746.99	1627	15.1972
scaffold_3.g911.t1	2025	1857.99	1121.2	9.84705
scaffold_3.g911.t2	2028	1860.99	2327.8	20.4111
scaffold_3.g912.t1	2916	2748.99	172.807	1.02578
scaffold_3.g912.t2	2886	2718.99	503.193	3.0199
scaffold_3.g913.t1	393	227.636	13	0.931901
scaffold_3.g914.t1	576	409.11	1245	49.6588
scaffold_3.g915.t1	423	257.075	95	6.03019
scaffold_3.g916.t1	1734	1566.99	624	6.49806
scaffold_3.g917.t1	5100	4932.99	2486	8.22351
scaffold_3.g918.t1	948	780.994	431	9.00526
scaffold_3.g919.t1	795	628.028	2612	67.8673
scaffold_3.g920.t1	909	741.994	963	21.1784
scaffold_3.g921.t1	1860	1692.99	2027	19.5373
scaffold_3.g922.t1	567	400.12	329	13.4175
scaffold_3.g923.t1	213	64.5638	31	7.83501
scaffold_3.g924.t1	438	271.836	760	45.6218
scaffold_3.g925.t1	1128	960.994	3572	60.6537
scaffold_3.g926.t1	891	723.994	802	18.0762
scaffold_3.g927.t1	255	98.8288	34	5.61387
scaffold_3.g928.t1	1029	861.994	464	8.78376
scaffold_3.g929.t1	1407	1239.99	1642	21.6083
scaffold_3.g930.t1	2709	2541.99	4960.6	31.8439
scaffold_3.g930.t2	2688	2520.99	4643.4	30.056
scaffold_3.g931.t1	1038	870.994	5409	101.337
scaffold_3.g932.t1	3198	3030.99	863.758	4.65022
scaffold_3.g932.t2	3270	3102.99	1441.24	7.57919
scaffold_3.g933.t1	1518	1350.99	1836	22.1761
scaffold_3.g934.t1	678	511.055	776	24.7777
scaffold_3.g935.t1	600	433.078	178	6.70688
scaffold_3.g936.t1	2292	2124.99	1532	11.7643
scaffold_3.g937.t1	624	457.067	307	10.9604
scaffold_3.g938.t1	423	257.075	1	0.0634757
scaffold_3.g939.t1	1071	903.994	1107.13	19.9847
scaffold_3.g939.t2	1116	948.994	732.873	12.6018
scaffold_3.g940.t1	5109	4941.99	3240	10.6982
scaffold_3.g941.t1	1017	849.994	1446	27.76
scaffold_3.g942.t1	636	469.055	586	20.3864
scaffold_3.g943.t1	834	667.028	31	0.758375
scaffold_3.g944.t1	477	310.472	1749	91.9252
scaffold_3.g945.t1	810	643.028	45	1.14195
scaffold_3.g946.t1	378	213.045	0	0
scaffold_3.g947.t1	3081	2913.99	773	4.3287
scaffold_3.g948.t1	237	83.6239	13	2.53676
scaffold_3.g949.t1	1362	1194.99	434	5.9264
scaffold_3.g950.t1	462	295.555	203	11.2079
scaffold_3.g951.t1	1695	1527.99	343.129	3.6644
scaffold_3.g952.t1	246	91.1684	56	10.0233
scaffold_3.g953.t1	612	445.078	48.7143	1.78602
scaffold_3.g953.t2	654	487.055	45.2857	1.51722
scaffold_3.g954.t1	945	777.994	1585.87	33.2628
scaffold_3.g955.t1	1536	1368.99	476.289	5.67722
scaffold_3.g956.t1	5952	5784.99	19622	55.3486
scaffold_3.g957.t1	459	292.577	681	37.9817
scaffold_3.g958.t1	324	161.234	140	14.169
scaffold_3.g959.t1	399	233.468	1698	118.68
scaffold_3.g960.t1	2367	2199.99	6328	46.9366
scaffold_3.g961.t1	3348	3180.99	3549	18.2058
scaffold_3.g962.t1	3498	3330.99	6791	33.268
scaffold_3.g963.t1	990	822.994	8131	161.218
scaffold_3.g964.t1	2952	2784.99	11290	66.151
scaffold_3.g965.t1	438	271.836	682	40.9396
scaffold_3.g966.t1	1149	981.994	2858	47.492
scaffold_3.g967.t1	3789	3621.99	4293.92	19.3452
scaffold_3.g967.t2	3786	3618.99	2542.08	11.4622
scaffold_3.g968.t1	1287	1119.99	778	11.3352
scaffold_3.g969.t1	975	807.994	312	6.30105
scaffold_3.g970.t1	240	86.1239	38	7.1999
scaffold_3.g971.t1	1932	1764.99	4	0.0369814
scaffold_3.g972.t1	1581	1413.99	835.336	9.64008
scaffold_3.g972.t2	1515	1347.99	34.767	0.420868
scaffold_3.g972.t3	1476	1308.99	986.897	12.3027
scaffold_3.g973.t1	897	729.994	0.98103	0.0219296
scaffold_3.g973.t2	1131	963.994	4.11963	0.069735
scaffold_3.g974.t1	1125	957.994	4324.9	73.6682
scaffold_3.g975.t1	2130	1962.99	1312	10.9064
scaffold_3.g976.t1	291	130.593	1	0.124953
scaffold_3.g977.t1	348	184.082	22	1.95019
scaffold_3.g978.t1	318	155.564	1	0.104895
scaffold_3.g979.t1	306	144.329	0	0
scaffold_3.g980.t1	3549	3381.99	677	3.2665
scaffold_3.g981.t1	462	295.555	812	44.8317
scaffold_3.g982.t1	1941	1773.99	4484	41.2458
scaffold_3.g983.t1	597	430.089	2650	100.544
scaffold_3.g984.t1	2355	2187.99	1806	13.4691
scaffold_3.g985.t1	273	114.52	0	0
scaffold_3.g986.t1	456	289.62	0	0
scaffold_3.g987.t1	1269	1101.99	325.733	4.82336
scaffold_3.g988.t1	1638	1470.99	1385.27	15.367
scaffold_3.g989.t1	210	62.3533	4804	1257.22
scaffold_3.g990.t1	1185	1017.99	2188.24	35.0765
scaffold_3.g990.t2	1200	1032.99	10993.8	173.666
scaffold_3.g991.t1	867	699.994	1601	37.3219
scaffold_3.g992.t1	3318	3150.99	606.786	3.14235
scaffold_3.g992.t2	3225	3057.99	1196.21	6.38321
scaffold_3.g993.t1	285	125.133	0	0
scaffold_3.g994.t1	282	122.458	3	0.399762
scaffold_3.g995.t1	789	622.028	793	20.8032
scaffold_3.g996.t1	207	60.1663	53	14.3744
scaffold_3.g997.t1	279	119.814	15	2.04292
scaffold_3.g998.t1	1839	1671.99	421	4.10879
scaffold_3.g999.t1	300	138.823	2	0.235091
scaffold_3.g1000.t1	504	337.335	664	32.1198
scaffold_3.g1001.t1	627	460.055	580.2	20.5795
scaffold_3.g1002.t1	225	74.0054	12	2.64597
scaffold_3.g1003.t1	387	221.822	2.39158	0.175933
scaffold_3.g1004.t1	2403	2235.99	11.5376	0.0842001
scaffold_3.g1005.t1	2769	2601.99	1913.04	11.9973
scaffold_3.g1006.t1	864	696.994	6.19828	0.145114
scaffold_3.g1007.t1	285	125.133	10.553	1.37617
scaffold_3.g1008.t1	1254	1086.99	6698.54	100.559
scaffold_3.g1009.t1	405	239.379	100.946	6.88131
scaffold_3.g1010.t1	1635	1467.99	0	0
scaffold_3.g1011.t1	1020	852.994	3584.5	68.5725
scaffold_3.g1012.t1	2109	1941.99	4.39791	0.0369543
scaffold_3.g1012.t2	2100	1932.99	3.70547	0.0312809
scaffold_3.g1013.t1	927	759.994	161.136	3.45977
scaffold_3.g1014.t1	1020	852.994	0	0
scaffold_3.g1015.t1	852	685.028	25.1286	0.598587
scaffold_3.g1016.t1	786	619.028	7.03379	0.185415
scaffold_3.g1017.t1	2754	2586.99	57.0811	0.360051
scaffold_3.g1018.t1	348	184.082	8.5	0.753484
scaffold_3.g1019.t1	429	262.964	33	2.04779
scaffold_3.g1020.t1	876	708.994	97	2.23252
scaffold_3.g1021.t1	552	385.14	0	0
scaffold_3.g1022.t1	3309	3141.99	3031.51	15.7442
scaffold_3.g1023.t1	960	792.994	6.03224	0.12413
scaffold_3.g1024.t1	282	122.458	4.47773	0.596675
scaffold_3.g1025.t1	921	753.994	841	18.201
scaffold_3.g1026.t1	918	750.994	0	0
scaffold_3.g1027.t1	3195	3027.99	2810.52	15.146
scaffold_3.g1028.t1	708	541.043	0	0
scaffold_3.g1029.t1	369	204.329	0	0
scaffold_3.g1030.t1	1569	1401.99	6.0731	0.0706856
scaffold_3.g1031.t1	243	88.626	0	0
scaffold_3.g1032.t1	1518	1350.99	7.56084	0.0913236
scaffold_3.g1033.t1	339	175.468	20.5	1.90644
scaffold_3.g1034.t1	732	565.043	585	16.8943
scaffold_3.g1035.t1	813	646.028	325	8.20915
scaffold_3.g1036.t1	477	310.472	25	1.31397
scaffold_3.g1037.t1	450	283.642	7733.35	444.902
scaffold_3.g1038.t1	2874	2706.99	5101.38	30.7516
scaffold_3.g1039.t1	531	364.214	0	0
scaffold_3.g1040.t1	1251	1083.99	867.404	13.0575
scaffold_3.g1041.t1	213	64.5638	21	5.30759
scaffold_3.g1042.t1	906	738.994	368.627	8.13978
scaffold_3.g1043.t1	3621	3453.99	4167.46	19.6887
scaffold_3.g1044.t1	5358	5190.99	4700.18	14.7751
scaffold_3.g1044.t2	4713	4545.99	0	0
scaffold_3.g1045.t1	2439	2271.99	1.55028	0.0111345
scaffold_3.g1046.t1	8196	8028.99	4024.34	8.17901
scaffold_3.g1046.t2	8199	8031.99	12533.1	25.4625
scaffold_3.g1046.t3	8082	7914.99	6019.89	12.4109
scaffold_3.g1047.t1	543	376.149	1807	78.3907
scaffold_3.g1048.t1	477	310.472	205.654	10.8089
scaffold_3.g1049.t1	1059	891.994	0	0
scaffold_3.g1049.t2	1260	1092.99	783	11.6899
scaffold_3.g1050.t1	708	541.043	1781	53.7154
scaffold_3.g1051.t1	726	559.043	1896.5	55.3573
scaffold_3.g1052.t1	336	172.6	550.793	52.0731
scaffold_3.g1052.t2	366	201.4	217.207	17.5987
scaffold_3.g1053.t1	474	307.479	36.8285	1.95449
scaffold_3.g1054.t1	1539	1371.99	43.8669	0.521736
scaffold_3.g1055.t1	597	430.089	203.5	7.72099
scaffold_3.g1056.t1	1869	1701.99	6014.18	57.6614
scaffold_3.g1057.t1	1998	1830.99	12.9795	0.115674
scaffold_3.g1057.t2	1890	1722.99	4.14418	0.0392483
scaffold_3.g1058.t1	480	313.456	1018	52.9953
scaffold_3.g1059.t1	813	646.028	0	0
scaffold_3.g1060.t1	834	667.028	1788.18	43.7454
scaffold_3.g1061.t1	321	158.413	148	15.2454
scaffold_3.g1062.t1	363	198.491	338	27.7871
scaffold_3.g1063.t1	1599	1431.99	4.99938	0.0569694
scaffold_56.g1064.t1	327	164.044	0	0
scaffold_56.g1065.t1	807	640.028	1.00136	0.0255303
scaffold_56.g1066.t1	378	213.045	0	0
scaffold_56.g1067.t1	648	481.055	1405	47.6593
scaffold_56.g1068.t1	822	655.028	0	0
scaffold_56.g1069.t1	927	759.994	31	0.665608
scaffold_56.g1070.t1	2649	2481.99	914.137	6.01003
scaffold_56.g1070.t2	2610	2442.99	2508.86	16.758
scaffold_56.g1071.t1	669	502.055	125.937	4.09326
scaffold_56.g1072.t1	669	502.055	34.4093	1.11838
scaffold_56.g1073.t1	1554	1386.99	120.766	1.42081
scaffold_56.g1074.t1	249	93.6778	14	2.4387
scaffold_56.g1075.t1	255	98.8288	157.348	25.9803
scaffold_56.g1076.t1	1428	1260.99	80	1.03525
scaffold_56.g1077.t1	2577	2409.99	1296	8.77517
scaffold_56.g1078.t1	1086	918.994	388	6.88947
scaffold_56.g1079.t1	1314	1146.99	149	2.11978
scaffold_56.g1080.t1	4338	4170.99	2741.02	10.7235
scaffold_56.g1080.t2	4413	4245.99	547.985	2.10599
scaffold_56.g1081.t1	4368	4200.99	476.11	1.84936
scaffold_56.g1081.t2	4440	4272.99	694.703	2.65298
scaffold_56.g1081.t3	4371	4203.99	1905.19	7.39507
scaffold_56.g1082.t1	603	436.078	0	0
scaffold_56.g1083.t1	918	750.994	609	13.2327
scaffold_56.g1084.t1	3984	3816.99	1216	5.19851
scaffold_56.g1085.t1	270	111.948	21.8786	3.1891
scaffold_56.g1086.t1	267	109.277	0	0
scaffold_56.g1087.t1	786	619.028	209	5.50937
scaffold_56.g1088.t1	393	227.636	0	0
scaffold_56.g1089.t1	543	376.149	5	0.216909
scaffold_56.g1090.t1	1149	981.994	60	0.997032
scaffold_56.g1091.t1	2388	2220.99	659	4.84178
scaffold_56.g1092.t1	1104	936.994	1664	28.979
scaffold_56.g1093.t1	297	136.091	2	0.23981
scaffold_56.g1094.t1	438	271.836	256	15.3673
scaffold_56.g1095.t1	414	248.207	153	10.0587
scaffold_56.g1096.t1	1035	867.994	509	9.56903
scaffold_56.g1097.t1	1533	1365.99	328.886	3.92883
scaffold_56.g1097.t2	1485	1317.99	230.984	2.85979
scaffold_56.g1097.t3	1488	1320.99	363.131	4.48568
scaffold_56.g1098.t1	258	101.441	38	6.11276
scaffold_56.g1099.t1	792	625.028	2256	58.8989
scaffold_56.g1099.t2	780	613.028	2376	63.2458
scaffold_56.g1100.t1	1158	990.994	16	0.263461
scaffold_56.g1101.t1	285	125.133	8	1.04324
scaffold_56.g1102.t1	267	109.277	17	2.53855
scaffold_56.g1103.t1	1167	999.994	0	0
scaffold_56.g1103.t2	1089	921.994	1	0.0176986
scaffold_56.g1104.t1	1158	990.994	43	0.70805
scaffold_56.g1105.t1	879	711.994	4.99152	0.114399
scaffold_56.g1106.t1	870	702.994	0	0
scaffold_56.g1107.t1	333	169.756	1	0.0961262
scaffold_56.g1108.t1	333	169.756	1	0.0961262
scaffold_56.g1109.t1	1458	1290.99	17.8458	0.225568
scaffold_57.g1110.t1	348	184.082	8.7319	0.77404
scaffold_57.g1111.t1	345	181.188	0	0
scaffold_57.g1112.t1	780	613.028	1	0.0266186
scaffold_57.g1113.t1	819	652.028	3	0.0750795
scaffold_57.g1114.t1	1173	1005.99	7	0.113545
scaffold_57.g1115.t1	489	322.401	24	1.21474
scaffold_57.g1116.t1	1026	858.994	107	2.03264
scaffold_57.g1117.t1	303	141.607	3	0.345703
scaffold_57.g1118.t1	1212	1044.99	2	0.0312308
scaffold_57.g1119.t1	4380	4212.99	32.4539	0.125702
scaffold_57.g1119.t2	4404	4236.99	27.5461	0.106089
scaffold_57.g1120.t1	1866	1698.99	238	2.28587
scaffold_57.g1121.t1	1710	1542.99	537	5.67906
scaffold_57.g1122.t1	291	130.593	6	0.749718
scaffold_57.g1123.t1	738	571.028	690	19.7178
scaffold_57.g1124.t1	1602	1434.99	852	9.68849
scaffold_57.g1125.t1	5001	4833.99	5038	17.0066
scaffold_57.g1126.t1	2094	1926.99	4373	37.031
scaffold_57.g1127.t1	1227	1059.99	6821	105.005
scaffold_57.g1128.t1	552	385.14	1943	82.323
scaffold_57.g1129.t1	1653	1485.99	4275	46.9446
scaffold_57.g1130.t1	210	62.3533	132	34.5447
scaffold_57.g1131.t1	1035	867.994	496	9.32463
scaffold_57.g1132.t1	231	78.7832	50	10.3563
scaffold_57.g1133.t1	1422	1254.99	2299	29.8926
scaffold_57.g1134.t1	1458	1290.99	460	5.81434
scaffold_57.g1135.t1	1353	1185.99	928.897	12.7806
scaffold_57.g1135.t2	1398	1230.99	1146.1	15.1927
scaffold_57.g1136.t1	2115	1947.99	109	0.913073
scaffold_57.g1137.t1	810	643.028	2691	68.2889
scaffold_57.g1138.t1	804	637.028	882	22.5931
scaffold_57.g1139.t1	2097	1929.99	857	7.24589
scaffold_57.g1140.t1	7065	6897.99	17614.2	41.6684
scaffold_57.g1140.t2	7323	7155.99	1479.8	3.37442
scaffold_57.g1141.t1	594	427.089	0	0
scaffold_57.g1142.t1	312	149.926	333	36.2438
scaffold_57.g1143.t1	1734	1566.99	445	4.63404
scaffold_57.g1144.t1	687	520.043	468	14.685
scaffold_57.g1145.t1	1992	1824.99	1868	16.7025
scaffold_57.g1146.t1	261	104.022	0	0
scaffold_57.g1147.t1	2298	2130.99	1798	13.7681
scaffold_57.g1148.t1	606	439.078	966	35.9006
scaffold_57.g1149.t1	420	254.119	0	0
scaffold_57.g1150.t1	276	117.15	830	115.611
scaffold_57.g1151.t1	387	221.822	201	14.7863
scaffold_57.g1152.t1	255	98.8288	0	0
scaffold_57.g1153.t1	4515	4347.99	1106	4.15081
scaffold_57.g1154.t1	867	699.994	0	0
scaffold_57.g1155.t1	405	239.379	0	0
scaffold_57.g1156.t1	504	337.335	3	0.14512
scaffold_57.g1157.t1	2466	2298.99	223.195	1.58421
scaffold_57.g1157.t2	2457	2289.99	830.805	5.92013
scaffold_57.g1158.t1	774	607.028	1.07442	0.0288823
scaffold_57.g1159.t1	234	81.1858	1	0.200996
scaffold_57.g1160.t1	342	178.329	3.92558	0.35921
scaffold_57.g1161.t1	795	628.028	241	6.26187
scaffold_57.g1162.t1	321	158.413	14	1.44213
scaffold_57.g1163.t1	1785	1617.99	817	8.23971
scaffold_57.g1164.t1	711	544.043	26478	794.18
scaffold_57.g1165.t1	2745	2577.99	1621	10.2605
scaffold_57.g1166.t1	942	774.994	5663	119.238
scaffold_57.g1167.t1	300	138.823	0	0
scaffold_57.g1168.t1	456	289.62	0	0
scaffold_57.g1169.t1	1248	1080.99	1155	17.4351
scaffold_57.g1170.t1	933	765.994	1174	25.0098
scaffold_57.g1171.t1	963	795.994	6	0.123001
scaffold_57.g1172.t1	1713	1545.99	1319	13.9221
scaffold_57.g1173.t1	273	114.52	185	26.3606
scaffold_57.g1174.t1	1419	1251.99	0	0
scaffold_57.g1175.t1	492	325.384	1	0.0501499
scaffold_57.g1176.t1	717	550.043	1	0.0296668
scaffold_57.g1177.t1	327	164.044	1	0.0994735
scaffold_57.g1178.t1	381	215.965	28.0102	2.11641
scaffold_57.g1179.t1	855	688.011	32	0.758964
scaffold_57.g1180.t1	810	643.028	2	0.0507536
scaffold_57.g1181.t1	327	164.044	2	0.198947
scaffold_57.g1182.t1	1233	1065.99	0	0
scaffold_57.g1183.t1	1335	1167.99	1	0.013971
scaffold_57.g1184.t1	651	484.055	0	0
scaffold_57.g1185.t1	303	141.607	0	0
scaffold_57.g1186.t1	312	149.926	0	0
scaffold_57.g1187.t1	558	391.12	0	0
scaffold_57.g1188.t1	411	245.263	0	0
scaffold_57.g1189.t1	264	106.634	0	0
scaffold_57.g1190.t1	498	331.352	47	2.3146
scaffold_57.g1191.t1	1656	1488.99	3909.06	42.8396
scaffold_57.g1191.t2	1569	1401.99	1948.71	22.6813
scaffold_57.g1191.t3	1476	1308.99	6822.23	85.0463
scaffold_57.g1192.t1	1524	1356.99	253	3.04235
scaffold_57.g1193.t1	978	810.994	29	0.583508
scaffold_57.g1194.t1	966	798.994	0	0
scaffold_57.g1195.t1	453	286.627	0	0
scaffold_57.g1196.t1	342	178.329	0	0
scaffold_57.g1197.t1	525	358.223	6	0.273316
scaffold_57.g1198.t1	2160	1992.99	47	0.384821
scaffold_57.g1199.t1	1245	1077.99	0	0
scaffold_57.g1200.t1	972	804.994	32	0.64867
scaffold_57.g1201.t1	1146	978.994	9.01693	0.150295
scaffold_57.g1202.t1	717	550.043	0	0
scaffold_57.g1203.t1	852	685.028	10.9715	0.261351
scaffold_57.g1203.t2	876	708.994	41.0285	0.9443
scaffold_57.g1204.t1	327	164.044	0	0
scaffold_57.g1205.t1	672	505.055	2	0.0646186
scaffold_57.g1206.t1	372	207.241	0	0
scaffold_57.g1207.t1	1179	1011.99	113	1.82208
scaffold_58.g1208.t1	2256	2088.99	1479	11.5531
scaffold_58.g1209.t1	201	55.8409	29	8.47446
scaffold_58.g1210.t1	2388	2220.99	4503	33.0842
scaffold_58.g1211.t1	486	319.417	0	0
scaffold_58.g1212.t1	285	125.133	1	0.130405
scaffold_58.g1213.t1	1596	1428.99	902.385	10.3045
scaffold_58.g1213.t2	1548	1380.99	3676.61	43.4433
scaffold_58.g1214.t1	303	141.607	21	2.41992
scaffold_58.g1215.t1	414	248.207	2	0.131487
scaffold_58.g1216.t1	2787	2619.99	3192	19.8806
scaffold_58.g1217.t1	1002	834.994	4874	95.2508
scaffold_58.g1218.t1	381	215.965	0	0
scaffold_58.g1219.t1	3663	3495.99	9297	43.3949
scaffold_58.g1220.t1	1866	1698.99	1340	12.87
scaffold_58.g1221.t1	1365	1197.99	0	0
scaffold_58.g1222.t1	1812	1644.99	0	0
scaffold_58.g1223.t1	1650	1482.99	6	0.0660205
scaffold_58.g1224.t1	327	164.044	0	0
scaffold_58.g1225.t1	297	136.091	0	0
scaffold_58.g1226.t1	1569	1401.99	0	0
scaffold_58.g1227.t1	417	251.164	8	0.519756
scaffold_58.g1228.t1	300	138.823	0	0
scaffold_58.g1229.t1	1818	1650.99	1201	11.8704
scaffold_58.g1230.t1	969	801.994	1770	36.0138
scaffold_58.g1231.t1	678	511.055	442.06	14.115
scaffold_58.g1231.t2	690	523.043	682.923	21.306
scaffold_58.g1231.t3	693	526.043	373.148	11.5752
scaffold_58.g1231.t4	546	379.149	1303.87	56.1165
scaffold_58.g1232.t1	2475	2307.99	293	2.07157
scaffold_58.g1233.t1	2289	2121.99	3107	23.8926
scaffold_58.g1234.t1	480	313.456	154	8.01698
scaffold_58.g1235.t1	711	544.043	8	0.239952
scaffold_58.g1236.t1	1101	933.994	23	0.401837
scaffold_58.g1237.t1	1017	849.994	976	18.737
scaffold_58.g1238.t1	204	57.9661	224	63.058
scaffold_58.g1239.t1	1845	1677.99	5513	53.6123
scaffold_58.g1240.t1	243	88.626	3	0.552366
scaffold_58.g1241.t1	2097	1929.99	10	0.0845494
scaffold_58.g1242.t1	1536	1368.99	184	2.19322
scaffold_58.g1243.t1	1551	1383.99	1112	13.111
scaffold_58.g1244.t1	1515	1347.99	2616	31.6677
scaffold_58.g1245.t1	1506	1338.99	38.0014	0.463114
scaffold_58.g1245.t2	1599	1431.99	218.999	2.49555
scaffold_58.g1246.t1	1578	1410.99	688	7.95664
scaffold_58.g1247.t1	1560	1392.99	1906	22.3275
scaffold_58.g1248.t1	1587	1419.99	392.16	4.50655
scaffold_58.g1248.t2	1008	840.994	0	0
scaffold_58.g1248.t3	1038	870.994	5.83966	0.109406
scaffold_58.g1249.t1	873	705.994	19.429	0.449072
scaffold_58.g1250.t1	1572	1404.99	69	0.801385
scaffold_58.g1251.t1	1455	1287.99	1766	22.374
scaffold_58.g1252.t1	513	346.267	826	38.9256
scaffold_58.g1253.t1	1875	1707.99	3411	32.5883
scaffold_58.g1254.t1	1560	1392.99	192.476	2.25472
scaffold_58.g1255.t1	1581	1413.99	109.095	1.259
scaffold_58.g1256.t1	600	433.078	31.2368	1.17697
scaffold_58.g1256.t2	603	436.078	146.686	5.48896
scaffold_58.g1257.t1	444	277.74	0	0
scaffold_58.g1258.t1	1680	1512.99	1984	21.3979
scaffold_58.g1259.t1	3324	3156.99	2538.62	13.1217
scaffold_58.g1260.t1	1680	1512.99	352.907	3.80619
scaffold_58.g1260.t2	1938	1770.99	448.86	4.13581
scaffold_58.g1261.t1	825	658.028	1392.61	34.5344
scaffold_58.g1262.t1	1698	1530.99	5059	53.921
scaffold_58.g1263.t1	1056	888.994	1712.94	31.442
scaffold_58.g1263.t2	1050	882.994	890.057	16.4485
scaffold_58.g1264.t1	5100	4932.99	7978.05	26.3908
scaffold_58.g1264.t2	5082	4914.99	7394.95	24.5515
scaffold_58.g1265.t1	2817	2649.99	3499	21.546
scaffold_58.g1266.t1	1080	912.994	1995	35.6567
scaffold_58.g1267.t1	1986	1818.99	6399	57.4047
scaffold_58.g1268.t1	1710	1542.99	4094	43.2962
scaffold_58.g1269.t1	960	792.994	2088	42.9662
scaffold_58.g1270.t1	327	164.044	740	73.6104
scaffold_58.g1271.t1	351	186.941	2888	252.091
scaffold_58.g1272.t1	1458	1290.99	2723	34.4184
scaffold_58.g1273.t1	531	364.214	41.5	1.85934
scaffold_58.g1274.t1	531	364.214	41.5	1.85934
scaffold_58.g1275.t1	4935	4767.99	2980	10.1988
scaffold_58.g1276.t1	1665	1497.99	7947	86.5685
scaffold_58.g1277.t1	1539	1371.99	2769.23	32.9362
scaffold_58.g1277.t2	1620	1452.99	440.772	4.95013
scaffold_58.g1278.t1	240	86.1239	9	1.70524
scaffold_58.g1279.t1	2088	1920.99	2053	17.4393
scaffold_58.g1280.t1	744	577.028	3970	112.269
scaffold_58.g1281.t1	5076	4908.99	1874.15	6.22986
scaffold_58.g1281.t2	5058	4890.99	1367.85	4.5636
scaffold_58.g1282.t1	1182	1014.99	6510	104.661
scaffold_58.g1283.t1	468	301.525	180	9.74128
scaffold_58.g1284.t1	750	583.028	746	20.8793
scaffold_58.g1285.t1	408	242.336	822	55.3503
scaffold_58.g1286.t1	2184	2016.99	7607	61.5425
scaffold_58.g1287.t1	1452	1284.99	3903	49.5637
scaffold_58.g1288.t1	741	574.028	2587.64	73.5591
scaffold_58.g1288.t2	888	720.994	817.364	18.4991
scaffold_58.g1289.t1	945	777.994	12	0.251693
scaffold_58.g1290.t1	2571	2403.99	5109.81	34.6847
scaffold_58.g1290.t2	2544	2376.99	2625.11	18.0213
scaffold_58.g1290.t3	2652	2484.99	0	0
scaffold_58.g1290.t4	2649	2481.99	939.08	6.17403
scaffold_58.g1291.t1	558	391.12	11.3595	0.47393
scaffold_58.g1291.t2	792	625.028	14.6238	0.381793
scaffold_58.g1291.t3	621	454.067	11.0167	0.395911
scaffold_58.g1292.t1	3201	3033.99	3861	20.7659
scaffold_58.g1293.t1	552	385.14	266	11.2702
scaffold_58.g1294.t1	1989	1821.99	46	0.411981
scaffold_58.g1295.t1	624	457.067	425	15.1732
scaffold_58.g1296.t1	1314	1146.99	2205	31.37
scaffold_58.g1297.t1	993	825.994	3473	68.6111
scaffold_58.g1298.t1	4239	4071.99	5463.85	21.8957
scaffold_58.g1298.t2	4245	4077.99	2702.15	10.8126
scaffold_58.g1299.t1	588	421.11	3689	142.949
scaffold_58.g1300.t1	516	349.267	2730	127.547
scaffold_58.g1301.t1	1074	906.994	777	13.9792
scaffold_58.g1302.t1	381	215.965	582	43.9751
scaffold_58.g1303.t1	579	412.11	183	7.2461
scaffold_58.g1304.t1	2655	2487.99	2561	16.7968
scaffold_58.g1305.t1	507	340.301	4216	202.164
scaffold_58.g1306.t1	375	210.131	3911	303.714
scaffold_58.g1307.t1	7179	7011.99	7570.14	17.6169
scaffold_58.g1307.t2	7341	7173.99	7013.86	15.9538
scaffold_59.g1308.t1	144	22.5482	56	40.5269
scaffold_59.g1309.t1	708	541.043	0	0
scaffold_59.g1310.t1	333	169.756	0	0
scaffold_59.g1311.t1	1470	1302.99	7.4437	0.0932208
scaffold_59.g1311.t2	2031	1863.99	4.46845	0.0391182
scaffold_59.g1311.t3	2001	1833.99	38.5498	0.342998
scaffold_59.g1312.t1	2382	2214.99	1600.63	11.7919
scaffold_59.g1313.t1	357	192.683	0.000372547	3.15505e-05
scaffold_59.g1313.t2	522	355.232	2.5025	0.114955
scaffold_59.g1314.t1	2985	2817.99	186.319	1.07891
scaffold_59.g1315.t1	1137	969.994	7.50446	0.126246
scaffold_59.g1316.t1	1842	1674.99	454.896	4.43165
scaffold_59.g1317.t1	849	682.028	1754.73	41.983
scaffold_59.g1318.t1	342	178.329	94.068	8.60768
scaffold_59.g1319.t1	876	708.994	2445.47	56.2843
scaffold_59.g1319.t2	876	708.994	4127.53	94.9979
scaffold_59.g1320.t1	579	412.11	4.39078	0.173858
scaffold_59.g1321.t1	1428	1260.99	108.26	1.40095
scaffold_59.g1322.t1	711	544.043	1.45852	0.0437467
scaffold_59.g1323.t1	690	523.043	369.851	11.5387
scaffold_59.g1324.t1	219	69.2679	15	3.53367
scaffold_59.g1325.t1	1185	1017.99	330.315	5.29479
scaffold_59.g1326.t1	759	592.028	9.18985	0.253298
scaffold_59.g1326.t2	789	622.028	19.4389	0.509951
scaffold_59.g1327.t1	3027	2859.99	547.641	3.12462
scaffold_59.g1328.t1	3972	3804.99	1659.78	7.11806
scaffold_59.g1329.t1	4104	3936.99	830.907	3.44393
scaffold_59.g1329.t2	4062	3894.99	1251.45	5.24293
scaffold_59.g1330.t1	1161	993.994	1137.23	18.6695
scaffold_59.g1331.t1	273	114.52	270.5	38.5435
scaffold_59.g1332.t1	498	331.352	4820	237.369
scaffold_59.g1333.t1	216	66.9156	1027.95	250.676
scaffold_59.g1334.t1	762	595.028	1.52787	0.0419001
scaffold_59.g1335.t1	480	313.456	1.51704	0.0789744
scaffold_59.g1336.t1	675	508.055	2010.5	64.5743
scaffold_59.g1337.t1	321	158.413	2	0.206019
scaffold_59.g1338.t1	471	304.487	13.5	0.723489
scaffold_59.g1339.t1	525	358.223	0	0
scaffold_59.g1340.t1	639	472.055	0	0
scaffold_59.g1341.t1	726	559.043	2987.5	87.2026
scaffold_59.g1342.t1	1023	855.994	0	0
scaffold_59.g1343.t1	315	152.718	617.5	65.9803
scaffold_59.g1344.t1	297	136.091	339.231	40.6754
scaffold_59.g1345.t1	867	699.994	5.67173	0.132217
scaffold_59.g1346.t1	663	496.055	1.30289	0.0428591
scaffold_59.g1347.t1	783	616.028	259.266	6.86769
scaffold_59.g1348.t1	543	376.149	391.5	16.9839
scaffold_59.g1349.t1	510	343.267	0	0
scaffold_59.g1350.t1	1410	1242.99	2304	30.2468
scaffold_59.g1351.t1	312	149.926	0	0
scaffold_59.g1352.t1	543	376.149	2.69541	0.116931
scaffold_59.g1353.t1	456	289.62	0	0
scaffold_59.g1354.t1	414	248.207	14.441	0.949398
scaffold_59.g1354.t2	408	242.336	109.43	7.36861
scaffold_59.g1355.t1	552	385.14	2461.59	104.295
scaffold_59.g1356.t1	960	792.994	1024.5	21.0819
scaffold_59.g1357.t1	1104	936.994	0	0
scaffold_59.g1358.t1	2754	2586.99	0	0
scaffold_59.g1358.t2	2655	2487.99	0	0
scaffold_59.g1359.t1	816	649.028	1554.11	39.0737
scaffold_59.g1359.t2	819	652.028	4333.21	108.445
scaffold_59.g1360.t1	1326	1158.99	1052.5	14.8186
scaffold_59.g1361.t1	888	720.994	3279.5	74.2237
scaffold_59.g1362.t1	219	69.2679	4.29217	1.01114
scaffold_59.g1363.t1	1380	1212.99	42065.3	565.889
scaffold_59.g1364.t1	915	747.994	1531.5	33.4107
scaffold_59.g1365.t1	618	451.067	5.06711	0.18331
scaffold_59.g1366.t1	543	376.149	24.5017	1.06293
scaffold_59.g1367.t1	672	505.055	2209.73	71.3949
scaffold_59.g1368.t1	492	325.384	509.088	25.5307
scaffold_59.g1369.t1	420	254.119	0	0
scaffold_59.g1370.t1	1050	882.994	0	0
scaffold_59.g1371.t1	294	133.334	3.81564	0.466973
scaffold_59.g1372.t1	999	831.994	42.4748	0.833063
scaffold_59.g1373.t1	5595	5427.99	13.9298	0.0418768
scaffold_59.g1374.t1	1167	999.994	0	0
scaffold_59.g1375.t1	2412	2244.99	1214.03	8.82431
scaffold_59.g1376.t1	1305	1137.99	1196.42	17.1557
scaffold_59.g1376.t2	1353	1185.99	876.176	12.0552
scaffold_59.g1376.t3	1344	1176.99	1237.41	17.1556
scaffold_59.g1377.t1	249	93.6778	2	0.348386
scaffold_59.g1378.t1	2091	1923.99	1197	10.1521
scaffold_59.g1379.t1	1716	1548.99	29.0816	0.306363
scaffold_59.g1380.t1	450	283.642	2.66748	0.153461
scaffold_59.g1381.t1	213	64.5638	2	0.505484
scaffold_59.g1382.t1	651	484.055	1	0.033711
scaffold_59.g1383.t1	1044	876.994	2544	47.3355
scaffold_59.g1384.t1	1968	1800.99	4995	45.2574
scaffold_59.g1385.t1	1362	1194.99	3136	42.823
scaffold_59.g1386.t1	1194	1026.99	16.9153	0.268769
scaffold_59.g1386.t2	1152	984.994	3001.08	49.7177
scaffold_59.g1387.t1	450	283.642	2893	166.435
scaffold_59.g1388.t1	825	658.028	867.093	21.5024
scaffold_59.g1388.t2	720	553.043	3169.91	93.5308
scaffold_59.g1389.t1	3960	3792.99	8906	38.3149
scaffold_59.g1390.t1	2664	2496.99	7404	48.3855
scaffold_59.g1391.t1	297	136.091	9723	1165.83
scaffold_59.g1392.t1	849	682.028	3097	74.0978
scaffold_59.g1393.t1	2541	2373.99	35.0193	0.24071
scaffold_59.g1394.t1	801	634.028	544	14.0009
scaffold_59.g1395.t1	288	127.881	3	0.38281
scaffold_59.g1396.t1	5379	5211.99	4720	14.7776
scaffold_59.g1397.t1	1257	1089.99	133	1.99111
scaffold_59.g1398.t1	213	64.5638	29	7.32953
scaffold_59.g1399.t1	1032	864.994	632	11.9226
scaffold_59.g1400.t1	486	319.417	4	0.204347
scaffold_59.g1401.t1	522	355.232	0	0
scaffold_59.g1402.t1	936	768.994	1	0.0212199
scaffold_59.g1403.t1	687	520.043	6	0.188269
scaffold_59.g1404.t1	1473	1305.99	454	5.67259
scaffold_59.g1405.t1	906	738.994	259	5.71907
scaffold_59.g1406.t1	519	352.241	78	3.61345
scaffold_60.g1407.t1	636	469.055	0	0
scaffold_60.g1408.t1	750	583.028	0	0
scaffold_60.g1409.t1	471	304.487	1	0.0535917
scaffold_60.g1410.t1	357	192.683	0	0
scaffold_60.g1411.t1	1410	1242.99	353.928	4.64636
scaffold_60.g1412.t1	1278	1110.99	845	12.4111
scaffold_60.g1413.t1	1011	843.994	5	0.0966712
scaffold_60.g1414.t1	2142	1974.99	1706	14.0955
scaffold_60.g1415.t1	204	57.9661	374	105.284
scaffold_60.g1416.t1	732	565.043	40.9668	1.18309
scaffold_60.g1417.t1	2691	2523.99	4485	28.9962
scaffold_60.g1418.t1	4644	4476.99	9471	34.5204
scaffold_60.g1419.t1	393	227.636	579	41.5054
scaffold_60.g1420.t1	627	460.055	7938	281.558
scaffold_60.g1421.t1	1317	1149.99	711	10.0888
scaffold_60.g1422.t1	849	682.028	1703	40.7454
scaffold_60.g1423.t1	318	155.564	2	0.209791
scaffold_60.g1424.t1	2133	1965.99	7879	65.3967
scaffold_60.g1425.t1	723	556.043	564	16.5515
scaffold_60.g1426.t1	300	138.823	316	37.1444
scaffold_60.g1427.t1	318	155.564	3844.17	403.236
scaffold_60.g1428.t1	1161	993.994	3243.38	53.2453
scaffold_60.g1428.t2	1662	1494.99	2409.44	26.2993
scaffold_60.g1429.t1	867	699.994	3924	91.4748
scaffold_60.g1430.t1	6003	5835.99	8649	24.1834
scaffold_60.g1431.t1	1737	1569.99	676.9	7.03547
scaffold_60.g1431.t2	1749	1581.99	433.1	4.46735
scaffold_60.g1432.t1	2148	1980.99	97	0.799016
scaffold_60.g1433.t1	483	316.425	353.601	18.2352
scaffold_60.g1433.t2	516	349.267	692.399	32.3493
scaffold_60.g1434.t1	504	337.335	0	0
scaffold_60.g1435.t1	2805	2637.99	516	3.19185
scaffold_60.g1435.t2	1542	1374.99	8.59926	0.102053
scaffold_60.g1435.t3	1647	1479.99	637.4	7.02779
scaffold_60.g1436.t1	3801	3633.99	3000	13.4711
scaffold_60.g1437.t1	435	268.884	1213.55	73.6478
scaffold_60.g1438.t1	2952	2784.99	2705	15.8493
scaffold_60.g1439.t1	1974	1806.99	2288	20.6617
scaffold_60.g1440.t1	873	705.994	1259.35	29.1079
scaffold_60.g1441.t1	2553	2385.99	365	2.49626
scaffold_60.g1442.t1	1971	1803.99	13185	119.265
scaffold_60.g1443.t1	3702	3534.99	8204	37.8707
scaffold_60.g1444.t1	7254	7086.99	3160.1	7.27622
scaffold_60.g1444.t2	7251	7083.99	1020.9	2.35164
scaffold_60.g1445.t1	2154	1986.99	98.1531	0.806073
scaffold_60.g1446.t1	240	86.1239	84	15.9156
scaffold_60.g1447.t1	5304	5136.99	4292.8	13.6364
scaffold_60.g1448.t1	1086	918.994	752	13.3528
scaffold_60.g1449.t1	2385	2217.99	420	3.08998
scaffold_60.g1450.t1	675	508.055	4094	131.493
scaffold_60.g1451.t1	3024	2856.99	2613	14.9244
scaffold_60.g1452.t1	1035	867.994	3318	62.3773
scaffold_60.g1453.t1	615	448.067	348	12.6737
scaffold_60.g1454.t1	264	106.634	677	103.6
scaffold_60.g1455.t1	354	189.842	418	35.9295
scaffold_60.g1456.t1	1581	1413.99	1481	17.0913
scaffold_60.g1457.t1	2511	2343.99	995	6.92681
scaffold_60.g1458.t1	4053	3885.99	3455	14.5082
scaffold_60.g1459.t1	303	141.607	3	0.345703
scaffold_60.g1460.t1	1533	1365.99	3428	40.9504
scaffold_60.g1461.t1	6126	5958.99	1996.96	5.46844
scaffold_60.g1461.t2	6129	5961.99	3364.04	9.20738
scaffold_60.g1462.t1	4518	4350.99	4994.64	18.7319
scaffold_60.g1462.t2	2766	2598.99	4074.36	25.5812
scaffold_60.g1463.t1	312	149.926	0	0
scaffold_60.g1464.t1	333	169.756	2	0.192252
scaffold_60.g1465.t1	201	55.8409	53	15.4878
scaffold_60.g1466.t1	2895	2727.99	5625	33.647
scaffold_60.g1467.t1	633	466.055	758	26.5398
scaffold_60.g1468.t1	456	289.62	172.439	9.71569
scaffold_60.g1468.t2	342	178.329	14.6894	1.34415
scaffold_60.g1469.t1	2289	2121.99	641	4.92925
scaffold_60.g1470.t1	2292	2124.99	1420	10.9043
scaffold_60.g1471.t1	1218	1050.99	0	0
scaffold_60.g1472.t1	234	81.1858	0	0
scaffold_60.g1473.t1	264	106.634	0	0
scaffold_60.g1474.t1	213	64.5638	0	0
scaffold_60.g1475.t1	393	227.636	0	0
scaffold_60.g1476.t1	627	460.055	4.69663	0.166588
scaffold_60.g1477.t1	750	583.028	34.3009	0.960026
scaffold_60.g1478.t1	999	831.994	0	0
scaffold_60.g1479.t1	402	236.432	2	0.138035
scaffold_60.g1480.t1	1662	1494.99	6.66195	0.0727158
scaffold_60.g1481.t1	681	514.055	0	0
scaffold_60.g1482.t1	6003	5835.99	0	0
scaffold_60.g1483.t1	384	218.888	1084.03	80.814
scaffold_60.g1484.t1	1929	1761.99	189.615	1.75605
scaffold_60.g1485.t1	1728	1560.99	564	5.89582
scaffold_60.g1486.t1	318	155.564	0	0
scaffold_60.g1487.t1	3312	3144.99	56.9749	0.295617
scaffold_60.g1487.t2	3057	2889.99	2445.57	13.8086
scaffold_60.g1487.t3	3384	3216.99	0	0
scaffold_60.g1488.t1	723	556.043	0	0
scaffold_60.g1489.t1	1500	1332.99	0	0
scaffold_60.g1490.t1	852	685.028	368.18	8.77037
scaffold_60.g1491.t1	981	813.994	491.777	9.85857
scaffold_60.g1492.t1	1545	1377.99	1096.35	12.9828
scaffold_60.g1492.t2	1563	1395.99	630.776	7.37324
scaffold_60.g1493.t1	639	472.055	439.33	15.1867
scaffold_60.g1494.t1	894	726.994	212	4.75852
scaffold_60.g1495.t1	627	460.055	13.3899	0.474934
scaffold_60.g1496.t1	2130	1962.99	1.43684e-06	1.19442e-08
scaffold_60.g1497.t1	2262	2094.99	17.1384	0.133491
scaffold_60.g1498.t1	2283	2115.99	3888.05	29.9836
scaffold_60.g1499.t1	777	610.028	0	0
scaffold_61.g1500.t1	390	224.738	398	28.8984
scaffold_61.g1501.t1	339	175.468	2078.28	193.274
scaffold_61.g1502.t1	339	175.468	4020.72	373.915
scaffold_61.g1503.t1	321	158.413	483	49.7536
scaffold_61.g1504.t1	624	457.067	1504	53.6951
scaffold_61.g1505.t1	1386	1218.99	1929	25.8224
scaffold_61.g1506.t1	846	679.028	721	17.3266
scaffold_61.g1507.t1	1098	930.994	444.672	7.79399
scaffold_61.g1508.t1	1137	969.994	915.328	15.3984
scaffold_61.g1509.t1	6912	6744.99	1209.82	2.92689
scaffold_61.g1509.t2	6756	6588.99	873.177	2.16247
scaffold_61.g1510.t1	273	114.52	1	0.14249
scaffold_61.g1511.t1	339	175.468	6	0.557982
scaffold_61.g1512.t1	477	310.472	1661	87.3
scaffold_61.g1513.t1	1269	1101.99	1917	28.3863
scaffold_61.g1514.t1	876	708.994	2618	60.2551
scaffold_61.g1515.t1	972	804.994	652	13.2167
scaffold_61.g1516.t1	1650	1482.99	5774.82	63.5427
scaffold_61.g1516.t2	1626	1458.99	4081.18	45.6456
scaffold_61.g1517.t1	321	158.413	1940	199.838
scaffold_61.g1518.t1	1749	1581.99	1583	16.3284
scaffold_61.g1519.t1	1356	1188.99	9004	123.573
scaffold_61.g1520.t1	1026	858.994	3142	59.6874
scaffold_61.g1521.t1	495	328.368	1095	54.4151
scaffold_61.g1522.t1	1068	900.994	2203	39.8987
scaffold_61.g1523.t1	1350	1182.99	2401	33.1189
scaffold_61.g1524.t1	342	178.329	1	0.0915049
scaffold_61.g1525.t1	747	580.028	1	0.0281331
scaffold_61.g1526.t1	6075	5907.99	476.338	1.31565
scaffold_61.g1526.t2	6051	5883.99	637.056	1.76674
scaffold_61.g1526.t3	6069	5901.99	1218.61	3.36923
scaffold_61.g1527.t1	1719	1551.99	3183	33.4667
scaffold_61.g1528.t1	351	186.941	1069	93.3122
scaffold_61.g1529.t1	372	207.241	767	60.393
scaffold_61.g1530.t1	1590	1422.99	773	8.86427
scaffold_61.g1531.t1	390	224.738	5	0.363045
scaffold_61.g1532.t1	363	198.491	3	0.246631
scaffold_61.g1533.t1	1974	1806.99	119.038	1.07497
scaffold_61.g1534.t1	4371	4203.99	1171.71	4.54803
scaffold_61.g1534.t2	4350	4182.99	2120.09	8.27054
scaffold_61.g1534.t3	4317	4149.99	3187.2	12.5322
scaffold_61.g1535.t1	1437	1269.99	1416	18.194
scaffold_61.g1536.t1	1371	1203.99	147.043	1.99291
scaffold_61.g1537.t1	1503	1335.99	1175	14.3516
scaffold_61.g1538.t1	672	505.055	2800	90.466
scaffold_61.g1539.t1	1068	900.994	1763	31.9299
scaffold_61.g1540.t1	2730	2562.99	1520	9.67749
scaffold_61.g1541.t1	2664	2496.99	43.1981	0.282302
scaffold_61.g1541.t2	2667	2499.99	396.802	2.59001
scaffold_61.g1542.t1	2280	2112.99	1858	14.3488
scaffold_61.g1543.t1	1563	1395.99	3249	37.9781
scaffold_61.g1544.t1	843	676.028	8750	211.208
scaffold_61.g1545.t1	5112	4944.99	3984	13.1468
scaffold_61.g1546.t1	657	490.055	1646.69	54.8318
scaffold_61.g1546.t2	696	529.043	1798.31	55.4678
scaffold_61.g1547.t1	660	493.055	1621	53.648
scaffold_61.g1548.t1	405	239.379	493	33.6069
scaffold_61.g1549.t1	5880	5712.99	6999.27	19.992
scaffold_61.g1549.t2	6006	5838.99	496.746	1.38823
scaffold_61.g1549.t3	6003	5835.99	1681.05	4.70038
scaffold_61.g1550.t1	1338	1170.99	2974	41.4432
scaffold_61.g1551.t1	465	298.532	1135	62.0399
scaffold_61.g1552.t1	249	93.6778	1	0.174193
scaffold_61.g1553.t1	1200	1032.99	2554.15	40.3474
scaffold_61.g1554.t1	678	511.055	1820	58.1126
scaffold_61.g1555.t1	747	580.028	1414	39.7802
scaffold_61.g1556.t1	738	571.028	779	22.2611
scaffold_61.g1557.t1	900	732.994	11138	247.955
scaffold_61.g1558.t1	3018	2850.99	28103	160.851
scaffold_61.g1559.t1	1200	1032.99	51	0.805636
scaffold_61.g1560.t1	14910	14743	19230	21.2843
scaffold_61.g1561.t1	486	319.417	38	1.9413
scaffold_61.g1562.t1	1530	1362.99	2398	28.7093
scaffold_61.g1563.t1	1809	1641.99	305	3.03106
scaffold_61.g1564.t1	468	301.525	5910	319.839
scaffold_61.g1565.t1	534	367.205	4427	196.729
scaffold_61.g1566.t1	423	257.075	483	30.6588
scaffold_61.g1567.t1	1056	888.994	1144	20.9988
scaffold_61.g1568.t1	1137	969.994	2984	50.1992
scaffold_61.g1569.t1	1425	1257.99	1193.99	15.4878
scaffold_61.g1570.t1	234	81.1858	46	9.2458
scaffold_61.g1571.t1	1419	1251.99	2343	30.5377
scaffold_61.g1572.t1	1005	837.994	849	16.5323
scaffold_61.g1573.t1	1428	1260.99	1503	19.4497
scaffold_61.g1574.t1	1449	1281.99	780.146	9.93017
scaffold_61.g1575.t1	1449	1281.99	300.854	3.82945
scaffold_61.g1576.t1	1326	1158.99	193	2.71733
scaffold_61.g1577.t1	1068	900.994	969	17.5497
scaffold_61.g1578.t1	210	62.3533	1	0.261702
scaffold_61.g1579.t1	1173	1005.99	1738	28.1917
scaffold_61.g1580.t1	1104	936.994	8122	141.447
scaffold_61.g1581.t1	1824	1656.99	2417.42	23.8067
scaffold_61.g1581.t2	1797	1629.99	1742.58	17.4451
scaffold_61.g1582.t1	2250	2082.99	551	4.31648
scaffold_61.g1583.t1	1713	1545.99	406	4.28534
scaffold_61.g1584.t1	531	364.214	3	0.13441
scaffold_61.g1585.t1	546	379.149	4	0.172154
scaffold_61.g1586.t1	1083	915.994	299.859	5.34184
scaffold_61.g1587.t1	1446	1278.99	6	0.0765507
scaffold_61.g1587.t2	1512	1344.99	0	0
scaffold_61.g1588.t1	1083	915.994	1101.18	19.617
scaffold_61.g1589.t1	1077	909.994	573.962	10.2923
scaffold_61.g1590.t1	2106	1938.99	239	2.01135
scaffold_61.g1591.t1	1812	1644.99	8298	82.3144
scaffold_61.g1592.t1	1830	1662.99	3889	38.1605
scaffold_61.g1593.t1	396	230.561	2291	162.146
scaffold_61.g1594.t1	408	242.336	0	0
scaffold_61.g1595.t1	2202	2034.99	5578	44.7283
scaffold_61.g1596.t1	1305	1137.99	6	0.0860355
scaffold_61.g1597.t1	312	149.926	7	0.761883
scaffold_61.g1598.t1	1113	945.994	1903	32.8259
scaffold_61.g1599.t1	1671	1503.99	1053	11.4248
scaffold_61.g1600.t1	801	634.028	1208.97	31.1153
scaffold_61.g1600.t2	804	637.028	1237.03	31.6875
scaffold_61.g1601.t1	702	535.043	16	0.487976
scaffold_61.g1602.t1	2433	2265.99	6490.35	46.7386
scaffold_61.g1602.t2	2391	2223.99	3870.65	28.3999
scaffold_61.g1603.t1	972	804.994	897	18.183
scaffold_61.g1604.t1	315	152.718	454	48.5102
scaffold_61.g1605.t1	654	487.055	1285	43.0518
scaffold_61.g1606.t1	1188	1020.99	1963	31.3736
scaffold_61.g1607.t1	2742	2574.99	1714	10.8618
scaffold_61.g1608.t1	903	735.994	432	9.57803
scaffold_61.g1609.t1	1770	1602.99	77	0.783836
scaffold_61.g1610.t1	492	325.384	37	1.85555
scaffold_61.g1611.t1	729	562.043	2	0.0580667
scaffold_61.g1612.t1	867	699.994	111	2.58759
scaffold_61.g1613.t1	372	207.241	3	0.236218
scaffold_61.g1614.t1	456	289.62	29	1.63394
scaffold_61.g1615.t1	381	215.965	1	0.0755586
scaffold_61.g1616.t1	435	268.884	8	0.485503
scaffold_61.g1617.t1	681	514.055	13	0.412667
scaffold_61.g1618.t1	678	511.055	17	0.54281
scaffold_61.g1619.t1	1791	1623.99	84	0.844037
scaffold_61.g1620.t1	1071	903.994	13	0.234663
scaffold_61.g1621.t1	1320	1152.99	7	0.099069
scaffold_61.g1622.t1	621	454.067	1	0.0359374
scaffold_61.g1623.t1	2664	2496.99	21	0.137236
scaffold_61.g1624.t1	846	679.028	5	0.120157
scaffold_61.g1625.t1	687	520.043	4	0.125513
scaffold_61.g1626.t1	591	424.1	2	0.0769536
scaffold_61.g1627.t1	1023	855.994	2	0.0381264
scaffold_61.g1628.t1	354	189.842	97	8.33771
scaffold_61.g1629.t1	786	619.028	5	0.131803
scaffold_61.g1630.t1	1188	1020.99	39	0.623316
scaffold_61.g1631.t1	882	714.994	3	0.0684677
scaffold_61.g1632.t1	1032	864.994	186	3.50886
scaffold_61.g1633.t1	768	601.028	1	0.0271501
scaffold_61.g1634.t1	1083	915.994	9	0.160331
scaffold_61.g1635.t1	2310	2142.99	153	1.16503
scaffold_61.g1636.t1	1254	1086.99	5	0.0750602
scaffold_61.g1637.t1	1023	855.994	6	0.114379
scaffold_61.g1638.t1	1287	1119.99	10	0.145697
scaffold_61.g1639.t1	1005	837.994	3	0.058418
scaffold_61.g1640.t1	2001	1833.99	14	0.124565
scaffold_61.g1641.t1	693	526.043	10	0.310203
scaffold_61.g1642.t1	999	831.994	10	0.196131
scaffold_61.g1643.t1	792	625.028	18	0.469937
scaffold_61.g1644.t1	510	343.267	106	5.03896
scaffold_61.g1645.t1	1425	1257.99	7	0.0908001
scaffold_61.g1646.t1	744	577.028	14	0.395911
scaffold_61.g1647.t1	2508	2340.99	20	0.139411
scaffold_61.g1648.t1	1212	1044.99	13	0.203
scaffold_61.g1649.t1	690	523.043	268	8.36112
scaffold_61.g1650.t1	963	795.994	112	2.29602
scaffold_61.g1651.t1	525	358.223	7	0.318868
scaffold_61.g1652.t1	309	147.154	183	20.293
scaffold_61.g1653.t1	1677	1509.99	91	0.983406
scaffold_61.g1654.t1	648	481.055	5	0.169606
scaffold_61.g1655.t1	1284	1116.99	78	1.13949
scaffold_61.g1656.t1	1050	882.994	43	0.794653
scaffold_61.g1657.t1	1284	1116.99	20	0.292177
scaffold_61.g1658.t1	960	792.994	31	0.637909
scaffold_61.g1659.t1	2049	1881.99	91	0.789023
scaffold_61.g1660.t1	204	57.9661	2	0.563018
scaffold_61.g1661.t1	450	283.642	3	0.172591
scaffold_61.g1662.t1	471	304.487	2	0.107183
scaffold_61.g1663.t1	1446	1278.99	14	0.178618
scaffold_61.g1664.t1	1470	1302.99	49	0.613649
scaffold_61.g1665.t1	876	708.994	76	1.74919
scaffold_61.g1666.t1	1554	1386.99	134	1.57651
scaffold_61.g1667.t1	540	373.168	5	0.218641
scaffold_61.g1668.t1	813	646.028	33	0.833545
scaffold_61.g1669.t1	741	574.028	60	1.70563
scaffold_61.g1670.t1	1026	858.994	20	0.379933
scaffold_61.g1671.t1	1047	879.994	6	0.11126
scaffold_61.g1672.t1	396	230.561	16	1.1324
scaffold_61.g1673.t1	351	186.941	7	0.611025
scaffold_61.g1674.t1	678	511.055	10	0.3193
scaffold_61.g1675.t1	1206	1038.99	14	0.219878
scaffold_61.g1676.t1	717	550.043	12	0.356001
scaffold_61.g1677.t1	2412	2244.99	836	6.07656
scaffold_62.g1678.t1	270	111.948	205	29.8815
scaffold_62.g1679.t1	699	532.043	2.61222	0.080118
scaffold_62.g1680.t1	1599	1431.99	7117.43	81.1052
scaffold_62.g1681.t1	1800	1632.99	672	6.71508
scaffold_62.g1682.t1	999	831.994	1628	31.9301
scaffold_62.g1683.t1	1557	1389.99	1328	15.5902
scaffold_62.g1684.t1	1377	1209.99	129	1.7397
scaffold_62.g1685.t1	1545	1377.99	2876	34.0571
scaffold_62.g1686.t1	1311	1143.99	1693	24.149
scaffold_62.g1687.t1	3774	3606.99	6214	28.112
scaffold_62.g1688.t1	312	149.926	0	0
scaffold_62.g1689.t1	2967	2799.99	2396.55	13.9668
scaffold_62.g1690.t1	762	595.028	26	0.713021
scaffold_62.g1691.t1	3171	3003.99	1362.55	7.40153
scaffold_62.g1691.t2	3129	2961.99	1652.97	9.10642
scaffold_62.g1691.t3	2136	1968.99	71.951	0.596292
scaffold_62.g1691.t4	945	777.994	145.524	3.05229
scaffold_62.g1692.t1	1386	1218.99	437	5.84987
scaffold_62.g1693.t1	462	295.555	0	0
scaffold_62.g1694.t1	1410	1242.99	5291	69.4601
scaffold_62.g1695.t1	474	307.479	11	0.583772
scaffold_62.g1696.t1	276	117.15	124	17.2721
scaffold_62.g1697.t1	2559	2391.99	7882	53.7704
scaffold_62.g1698.t1	2460	2292.99	4393	31.2626
scaffold_62.g1699.t1	282	122.458	1133	150.977
scaffold_62.g1700.t1	2184	2016.99	740	5.98679
scaffold_62.g1701.t1	528	361.214	58.4743	2.6416
scaffold_62.g1702.t1	315	152.718	10	1.06851
scaffold_62.g1703.t1	228	76.38	6	1.28185
scaffold_62.g1704.t1	2742	2574.99	39	0.247147
scaffold_62.g1705.t1	321	158.413	58	5.97455
scaffold_62.g1706.t1	1248	1080.99	1401.38	21.1543
scaffold_62.g1706.t2	747	580.028	68.6206	1.93051
scaffold_62.g1707.t1	429	262.964	1.27027	0.0788255
scaffold_62.g1708.t1	1527	1359.99	1334	16.0061
scaffold_62.g1709.t1	669	502.055	1841	59.8368
scaffold_62.g1710.t1	720	553.043	4705	138.825
scaffold_62.g1711.t1	2289	2121.99	2173	16.7102
scaffold_62.g1712.t1	606	439.078	2912	108.222
scaffold_62.g1713.t1	315	152.718	295	31.521
scaffold_62.g1714.t1	969	801.994	4068	82.7707
scaffold_62.g1715.t1	552	385.14	1053	44.6146
scaffold_62.g1716.t1	222	71.5767	7278	1659.23
scaffold_62.g1717.t1	666	499.055	2548	83.3139
scaffold_62.g1718.t1	1002	834.994	29626.5	578.98
scaffold_62.g1719.t1	576	409.11	8152	325.155
scaffold_62.g1720.t1	2745	2577.99	2728	17.2675
scaffold_62.g1721.t1	1047	879.994	924	17.134
scaffold_62.g1722.t1	633	466.055	353	12.3596
scaffold_62.g1723.t1	2241	2073.99	3112	24.4849
scaffold_62.g1724.t1	249	93.6778	1	0.174193
scaffold_62.g1725.t1	567	400.12	2252	91.8427
scaffold_62.g1726.t1	246	91.1684	0	0
scaffold_62.g1727.t1	501	334.343	17	0.829703
scaffold_62.g1728.t1	1620	1452.99	36	0.404301
scaffold_62.g1729.t1	255	98.8288	0	0
scaffold_62.g1730.t1	396	230.561	19	1.34473
scaffold_62.g1731.t1	1332	1164.99	128	1.79289
scaffold_62.g1732.t1	1482	1314.99	24	0.29782
scaffold_62.g1733.t1	840	673.028	0	0
scaffold_62.g1734.t1	1161	993.994	395	6.48455
scaffold_62.g1735.t1	1044	876.994	985	18.3276
scaffold_62.g1736.t1	657	490.055	440	14.6512
scaffold_62.g1737.t1	1326	1158.99	2217.91	31.227
scaffold_62.g1738.t1	483	316.425	1072	55.2829
scaffold_62.g1739.t1	444	277.74	144	8.46039
scaffold_62.g1740.t1	870	702.994	47	1.09097
scaffold_62.g1741.t1	612	445.078	13	0.476622
scaffold_62.g1742.t1	207	60.1663	80.7678	21.9054
scaffold_62.g1743.t1	294	133.334	477.845	58.4806
scaffold_62.g1744.t1	999	831.994	202.244	3.96664
scaffold_62.g1745.t1	207	60.1663	65.4476	17.7504
scaffold_62.g1746.t1	453	286.627	132	7.51489
scaffold_62.g1747.t1	564	397.12	32	1.31491
scaffold_62.g1748.t1	2304	2136.99	1951	14.8977
scaffold_62.g1749.t1	1710	1542.99	2161	22.8537
scaffold_62.g1750.t1	1632	1464.99	861	9.59034
scaffold_62.g1751.t1	681	514.055	3	0.0952309
scaffold_62.g1752.t1	312	149.926	1	0.10884
scaffold_62.g1753.t1	1299	1131.99	1737	25.0393
scaffold_62.g1754.t1	1443	1275.99	34.3937	0.439842
scaffold_62.g1755.t1	1449	1281.99	16.6063	0.211375
scaffold_62.g1756.t1	549	382.14	38.3771	1.63876
scaffold_62.g1757.t1	747	580.028	34.8933	0.981655
scaffold_62.g1757.t2	675	508.055	53.7297	1.72572
scaffold_62.g1758.t1	1173	1005.99	411	6.66673
scaffold_62.g1759.t1	243	88.626	6	1.10473
scaffold_62.g1760.t1	378	213.045	1.4	0.107232
scaffold_62.g1761.t1	243	88.626	6	1.10473
scaffold_62.g1762.t1	372	207.241	0	0
scaffold_62.g1763.t1	270	111.948	0	0
scaffold_62.g1764.t1	327	164.044	0	0
scaffold_62.g1765.t1	426	260.023	5	0.31378
scaffold_62.g1766.t1	1392	1224.99	4	0.0532835
scaffold_62.g1767.t1	1581	1413.99	0	0
scaffold_62.g1768.t1	498	331.352	1.03621	0.0510299
scaffold_63.g1769.t1	11316	11149	101.639	0.148762
scaffold_63.g1770.t1	570	403.12	0	0
scaffold_63.g1771.t1	1170	1002.99	2	0.0325386
scaffold_63.g1772.t1	1386	1218.99	9	0.120478
scaffold_63.g1773.t1	489	322.401	3	0.151842
scaffold_63.g1774.t1	2121	1953.99	185.334	1.54774
scaffold_63.g1774.t2	2280	2112.99	850.694	6.56964
scaffold_63.g1774.t3	2277	2109.99	173.254	1.33989
scaffold_63.g1774.t4	2160	1992.99	908.718	7.44029
scaffold_63.g1775.t1	345	181.188	0	0
scaffold_63.g1776.t1	1704	1536.99	7787	82.6732
scaffold_63.g1777.t1	654	487.055	993	33.2688
scaffold_63.g1778.t1	333	169.756	104	9.99712
scaffold_63.g1779.t1	2043	1875.99	1150	10.0031
scaffold_63.g1780.t1	600	433.078	422.41	15.916
scaffold_63.g1781.t1	693	526.043	1535.67	47.6371
scaffold_63.g1782.t1	2772	2604.99	4460.26	27.9396
scaffold_63.g1782.t2	2775	2607.99	18.1402	0.113501
scaffold_63.g1782.t3	2709	2541.99	5895.6	37.846
scaffold_63.g1783.t1	951	783.994	20.6678	0.430179
scaffold_63.g1783.t2	954	786.994	94.3322	1.95594
scaffold_63.g1784.t1	1119	951.994	82	1.40555
scaffold_63.g1785.t1	222	71.5767	0	0
scaffold_63.g1786.t1	1752	1584.99	1271	13.0853
scaffold_63.g1787.t1	4149	3981.99	242	0.991702
scaffold_63.g1788.t1	22482	22315	25628.4	18.7409
scaffold_63.g1788.t2	22503	22336	8307.61	6.06929
scaffold_63.g1789.t1	1824	1656.99	1854	18.2581
scaffold_63.g1790.t1	1008	840.994	4	0.0776129
scaffold_63.g1791.t1	2115	1947.99	10	0.0837682
scaffold_63.g1792.t1	945	777.994	13658	286.469
scaffold_63.g1793.t1	804	637.028	1339	34.2995
scaffold_63.g1794.t1	315	152.718	0	0
[truncated: 19,648 more rows]
